# Supplementary material for: Synthesis of spiropyrans and arylquinones via Ru(ii)-catalyzed condition-controlled coupling of 3-aryl-2H-benzoxazinones with benzoquinones
Source: Royal Society of Chemistry journal article supplement (doi:10.1039/d3cc03395c), 2023-01-01

*Supporting Information*

**Synthesis of Spiropyrans and Arylquinones via Ru(II)-Catalyzed  
Conditions-Controlled Coupling of 3-Aryl-2H-benzoxazinones with  
Benzoquinones**

Mengying Zhang <sup>†,a</sup>, Yuhao He <sup>†,a</sup>, Song Li <sup>†,a</sup>, Yuehua Geng <sup>a</sup>, Xiangyang Liu <sup>a</sup>, Xifa Yang<sup>a,\*</sup>

<sup>a</sup> *College of Plant Protection, Henan Agricultural University, Zhengzhou, 450002, China*

\* yangxifachem@163.com

Contents

|    |                                             |     |
|----|---------------------------------------------|-----|
| 1. | General Information -----                   | S2  |
| 2. | Scale-up Synthesis and derivatization ----- | S3  |
| 3. | Mechanistic Studies -----                   | S5  |
| 4. | Characterization Data -----                 | S9  |
| 5. | References-----                             | S21 |
| 6. | NMR Spectra -----                           | S23 |

## 1. General Information

Unless otherwise noted, all the reactions were carried out in an argon-filled glove box. Anhydrous solvents were purified and dried by standard procedures. All chemicals were obtained from commercial sources and were used as received unless otherwise noted. Benzoxazines,<sup>1</sup> benzoquinones<sup>2</sup> were prepared by following literature reports. <sup>1</sup>H and <sup>13</sup>C NMR spectra were recorded on a Bruker AV 400 spectrometer (400 MHz for <sup>1</sup>H, 101 MHz for <sup>13</sup>C). All coupling constants were reported in Hz. The residual solvent signals were used as references for <sup>1</sup>H and <sup>13</sup>C NMR spectra and the chemical shifts were converted to the TMS scale (CDCl<sub>3</sub>: δ <sup>1</sup>H = 7.26 ppm, δ <sup>13</sup>C = 77.16 ppm). HRMS data were obtained using a TOF mode. Column chromatography was performed on silica gel (200-300 mesh) using ethyl acetate (EA)/petroleum ether (PE).

### 1.1 General Procedure for Synthesis of 3.

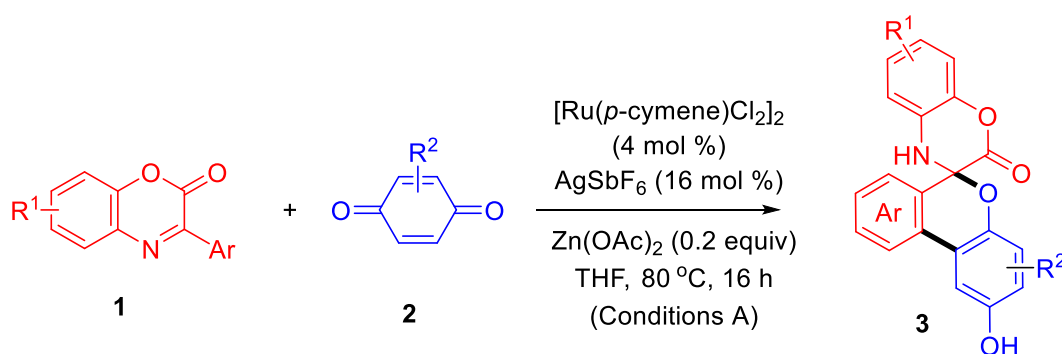

Benzoxazines (0.20 mmol), benzoquinones (0.30 mmol), [RuCl<sub>2</sub>(*p*-cymene)]<sub>2</sub> (4 mol %), AgSbF<sub>6</sub> (16 mol %), Zn(OAc)<sub>2</sub> (0.04 mmol), and THF (3.0 mL) were charged into a pressure tube. The reaction mixture was stirred at 80 °C for 16 hours under the nitrogen atmosphere. After the solvent was removed under reduced pressure, the residue was purified by silica gel chromatography using PE/EA (9:1) to afford compound 3.

### 1.2 General Procedure for Synthesis of 4.

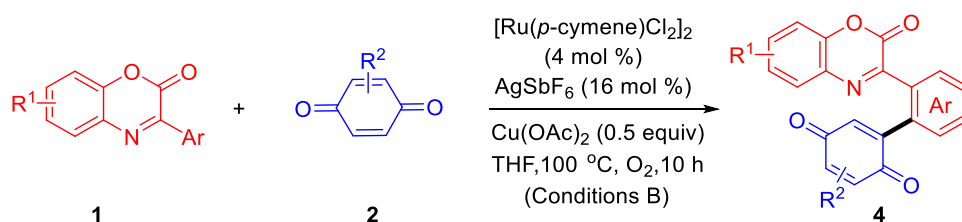

Benzoxazines (0.20 mmol), benzoquinones (0.44 mmol), [RuCl<sub>2</sub>(*p*-cymene)]<sub>2</sub> (4 mol %), AgSbF<sub>6</sub> (16 mol %), Cu(OAc)<sub>2</sub> (0.1 mmol), and THF (3.0 mL) were charged into a pressure tube. The reaction mixture was stirred at 100 °C for 10 hours under the oxygen atmosphere. After the solvent was removed under reduced pressure, the residue was purified by silica gel chromatography using PE/EA (12:1) to afford compound 4.

### 1.3 Optimization of Reaction Conditions.<sup>a,b</sup> (Table S1)

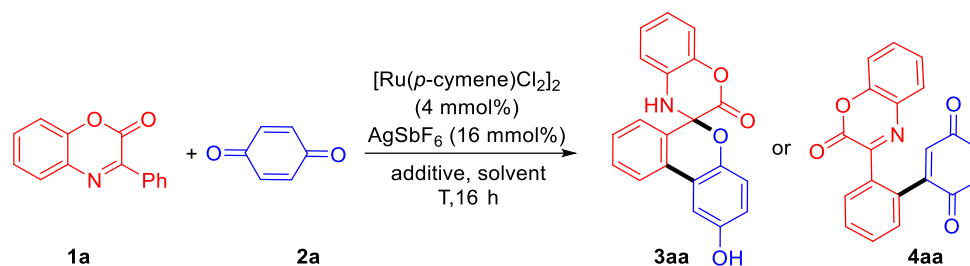

| entry                   | additive (equiv)                      | solvent    | T(°C)      | yield (%) <sup>a,b</sup> |              |
|-------------------------|---------------------------------------|------------|------------|--------------------------|--------------|
|                         |                                       |            |            | 3aa                      | 4aa          |
| 1                       | K <sub>2</sub> CO <sub>3</sub> (2.0)  | DCE        | 30         | 20                       | 8            |
| 2                       | K <sub>2</sub> CO <sub>3</sub> (2.0)  | MeCN       | 30         | ND                       |              |
| 3                       | K <sub>2</sub> CO <sub>3</sub> (2.0)  | DCM        | 30         | 13                       | 7            |
| 4                       | K <sub>2</sub> CO <sub>3</sub> (2.0)  | MeOH       | 30         | ND                       |              |
| 5                       | K <sub>2</sub> CO <sub>3</sub> (2.0)  | THF        | 30         | 30                       | 13           |
| 6                       | LiOAc (2.0)                           | THF        | 30         | ND                       |              |
| 7                       | NaOAc (2.0)                           | THF        | 30         | 10                       | 7            |
| 8                       | MesCOOH (2.0)                         | THF        | 30         | 30                       | 13           |
| 9                       | HOAc (2.0)                            | THF        | 30         | 10                       | 10           |
| 10                      | Zn(OAc) <sub>2</sub> (0.2)            | THF        | 30         | 35                       | 4            |
| 11                      | Zn(OAc) <sub>2</sub> (0.2)            | THF        | 60         | 50                       | 4            |
| <b>12</b>               | <b>Zn(OAc)<sub>2</sub> (0.2)</b>      | <b>THF</b> | <b>80</b>  | <b>85</b>                | <b>trace</b> |
| 13                      | Cu(OAc) <sub>2</sub> (0.2)            | THF        | 80         | 67                       | 20           |
| 14                      | Zn(OAc) <sub>2</sub> (0.5)            | THF        | 80         | 60                       | trace        |
| 15                      | Ag <sub>2</sub> O (2.0)               | THF        | 80         | ND                       |              |
| 16                      | Cu(OAc) <sub>2</sub> (2.0)            | THF        | 80         | 52                       | 10           |
| 17                      | Ag <sub>2</sub> CO <sub>3</sub> (2.0) | THF        | 80         | trace                    | 15           |
| 18 <sup>c</sup>         | Cu(OAc) <sub>2</sub> (2.0)            | THF        | 80         | trace                    | 23           |
| 19 <sup>c,d</sup>       | Cu(OAc) <sub>2</sub> (2.0)            | THF        | 80         | trace                    | 52           |
| <b>20<sup>c,d</sup></b> | <b>Cu(OAc)<sub>2</sub> (2.0)</b>      | <b>THF</b> | <b>100</b> | <b>trace</b>             | <b>55</b>    |
| <b>21<sup>c,d</sup></b> | <b>Cu(OAc)<sub>2</sub> (0.5)</b>      | <b>THF</b> | <b>100</b> | <b>trace</b>             | <b>55</b>    |

<sup>a</sup>Reaction conditions: **1a** (0.2 mmol), **2a** (0.3 mmol), [RuCl<sub>2</sub>(*p*-cymene)]<sub>2</sub> (4 mol %), AgSbF<sub>6</sub> (16 mol %), additive, solvent (3.0 mL) under N<sub>2</sub> for 16 hours. <sup>b</sup>Isolated yield after column chromatography. <sup>c</sup>under O<sub>2</sub>. <sup>d</sup>**2a** (0.44 mmol) was used.

## 2. Scale-up Synthesis and derivatization of the product

### 2.1 Scale-up Synthesis

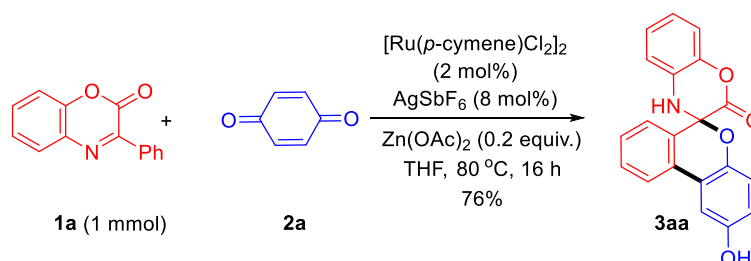

Benzoxazinones (1.0 mmol), benzoquinone (3.0 mmol), [RuCl<sub>2</sub>(*p*-cymene)]<sub>2</sub> (0.02 mmol, 2 mol %), AgSbF<sub>6</sub> (0.08 mmol, 8 mol %), Zn(OAc)<sub>2</sub> (0.2 mmol), and THF (10 mL) were charged into a pressure tube. The reaction mixture was stirred at 80 °C for 16 hours under the nitrogen atmosphere. After the

solvent was removed under reduced pressure, the residue was purified by silica gel chromatography using PE/EA (9:1) to afford compound **3aa** in 76% yield (0.2516 g).

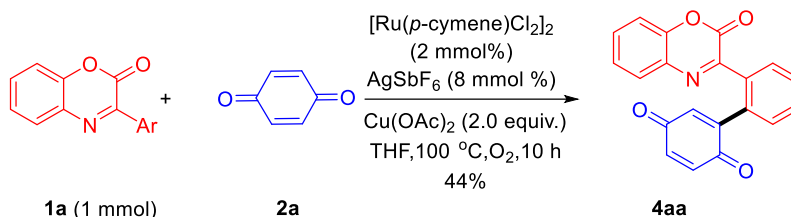

Benzoxazines (1.0 mmol), benzoquinone (2.2 mmol),  $[\text{RuCl}_2(p\text{-cymene})]_2$  (0.02 mmol, 2 mol %),  $\text{AgSbF}_6$  (0.08 mmol, 8 mol %),  $\text{Cu(OAc)}_2$  (2.0 mmol), and THF (10 mL) were charged into a pressure tube. The reaction mixture was stirred at 100 °C for 10 hours under the oxygen atmosphere. After the solvent was removed under reduced pressure, the residue was purified by silica gel chromatography using PE/EA (12:1) to afford compound **4aa** in 44% yield (0.1448 g).

## 2.2 derivatization of the 4aa

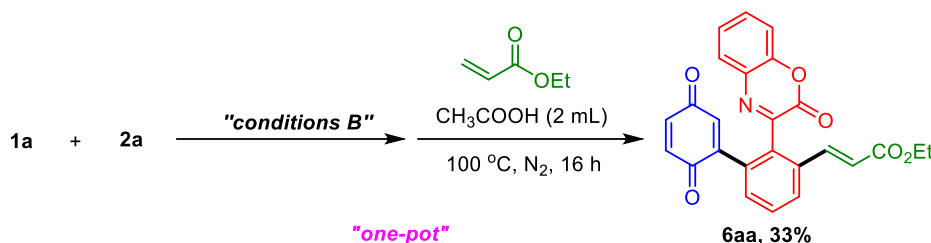

Benzoxazinones (0.20 mmol), benzoquinones (0.44 mmol),  $[\text{RuCl}_2(p\text{-cymene})]_2$  (4 mol%),  $\text{AgSbF}_6$  (16 mol %),  $\text{Cu(OAc)}_2$  (0.4 mmol), and THF (3.0 mL) were charged into a pressure tube. The reaction mixture was stirred at 100 °C for 10 hours under the oxygen atmosphere.<sup>3</sup> After the reaction vessel was cooled to room temperature, the solvent was removed by decompression concentration, then Ethyl acrylate (2.0 equiv) and  $\text{CH}_3\text{COOH}$  (2 mL) were charged into the pressure tube, and the reaction mixture was stirred at 100 °C for 16 h under the nitrogen atmosphere. And then quenched with water, the mixture was diluted with DCM. The organic phase was separated and washed with brine and then dried over anhydrous  $\text{MgSO}_4$ . The organic phase was removed under reduced pressure and the residue was purified by silica gel chromatography with PE/EA (5:1) to afford the desired product **6aa** in 33% yield (28.2 mg).

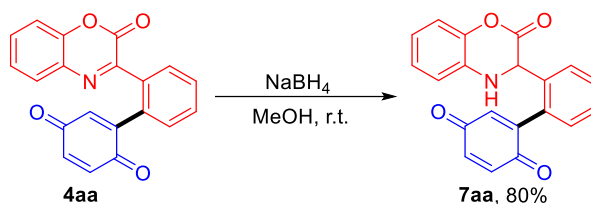

**4aa** (65.8 mg, 0.2 mmol, 1.0 equiv.),  $\text{NaBH}_4$  (15.1 mg, 0.4 mmol, 2.0 equiv.) and MeOH (4.0 mL) were charged into a pressure tube. The reaction mixture was stirred at room temperature for 16 h, and then quenched with water. After a half of solvent was evaporated *in vacuo*, the mixture was diluted with EtOAc (15 mL), washed with brine, and then dried over anhydrous  $\text{MgSO}_4$ , and solvent was removed under reduced pressure, the obtained residue was purified by column chromatography using PE/EA (10:1) as eluent to afford the desired product **7aa** in 80 % yield (52.9 mg).

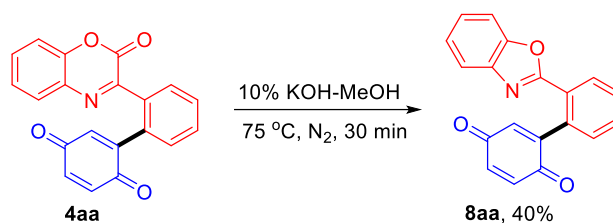

In a glovebox, **4aa** (65.8 mg, 0.2 mmol) were refluxed in 10% KOH-MeOH solution (2.0 mL) for 30 min.<sup>4</sup> After the reaction was cooled to the room temperature, the solvent was removed under reduced pressure, the residue was purified by silica gel chromatography using PE/EA (3:1) to afford the desired product **8aa** in 40% yield (24 mg).

### 3. Mechanistic Studies

#### 3.1 Synthesis of ruthenium complexes **11**.

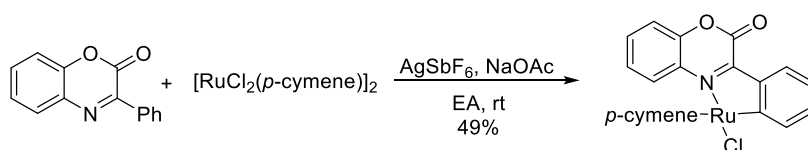

Benzoxazines **1a** (0.11 mmol, 2.2 equiv),  $[RuCl_2(p\text{-cymene})]_2$  (0.05 mmol, 1.0 equiv),  $AgSbF_6$  (0.2 mmol, 4.0 equiv),  $NaOAc$  (0.44 mmol, 4.4 equiv), and  $EtOAc$  (1.0 mL) were charged into a pressure tube. The reaction mixture was stirred at room temperature for 24 h in the nitrogen atmosphere. After the solvent was removed under reduced pressure, the residue was dissolved with dichloromethane and recrystallized to get the pure product **11a** in 49 % yield (24.4 mg).

#### 3.2 H/D exchange under conditions A

**1a** (0.20 mmol),  $[RuCl_2(p\text{-cymene})]_2$  (4 mol %),  $AgSbF_6$  (16 mol %), 0.04 mmol  $Zn(OAc)_2$ , 0.2 mL  $D_2O$ , and THF (3 mL) were charged into a pressure tube, and the mixture was heated at 80 °C for 16 h, no H/D exchange was observed on the basis of  $^1H$  NMR analysis, indicating that the C-H activation was largely irreversible in the catalytic system.

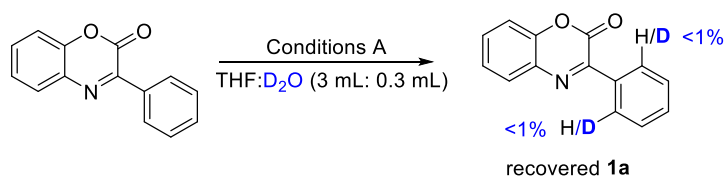

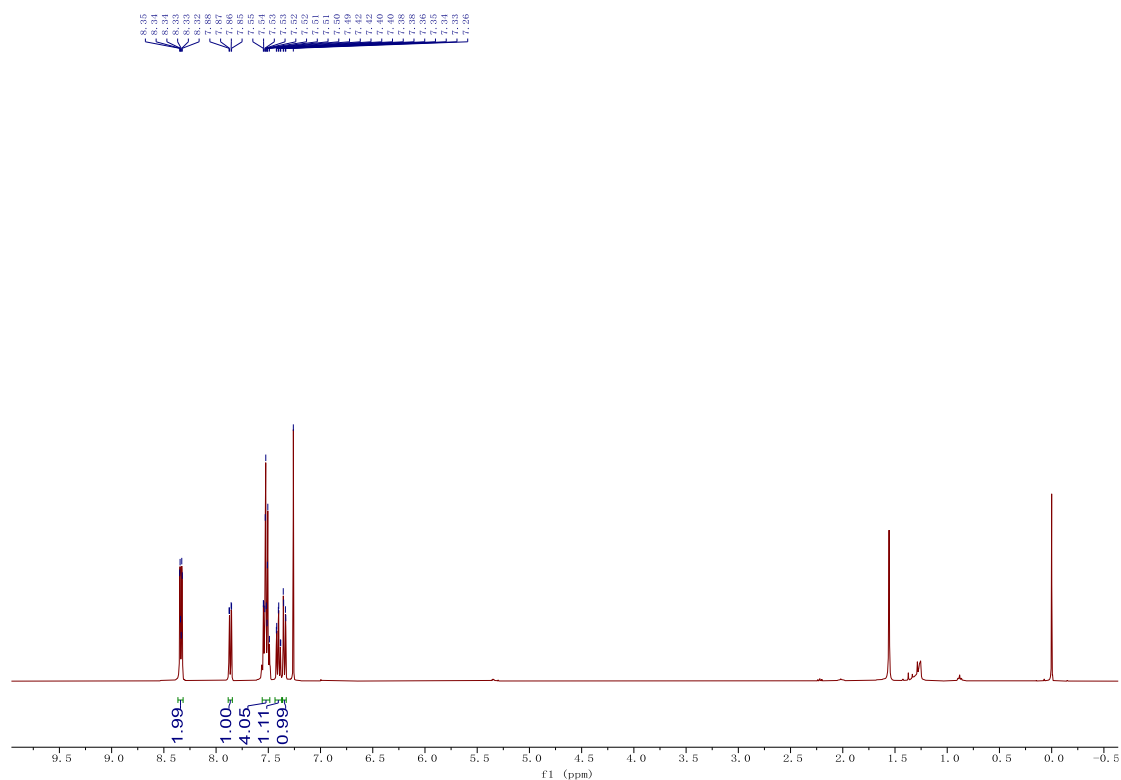

### 3.3 KIE Experiments

Two independent reactions with **1a** or deuterated substrate **1a-d<sub>5</sub>** under the standard conditions were performed. **1a** (0.1 mmol) or **1a-d<sub>5</sub>** (0.1 mmol), **2a** (0.15 mmol), AgSbF<sub>6</sub> (16 mol %), Zn(OAc)<sub>2</sub> (0.02 mmol), [RuCl<sub>2</sub>(*p*-cymene)]<sub>2</sub> (4 mol %), and THF (3.0 mL) were stirred side-by-side at 80 °C for 3 h under nitrogen. Both reactions were quenched and these two mixtures were rapidly combined, and the volatiles were removed under reduced pressure. The residue was purified by silica gel chromatography with 25 mg of **3aa** and *d*-**3aa** were recovered. KIE value ( $k_H/k_D = 2.1:1$ ) was determined on the basis of <sup>1</sup>H NMR analysis, suggesting the C-H activation is probably involved in the rate-determining step.

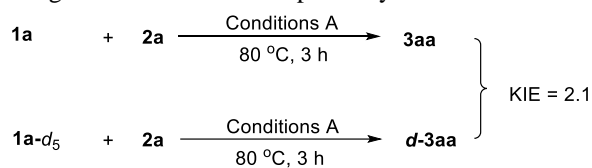

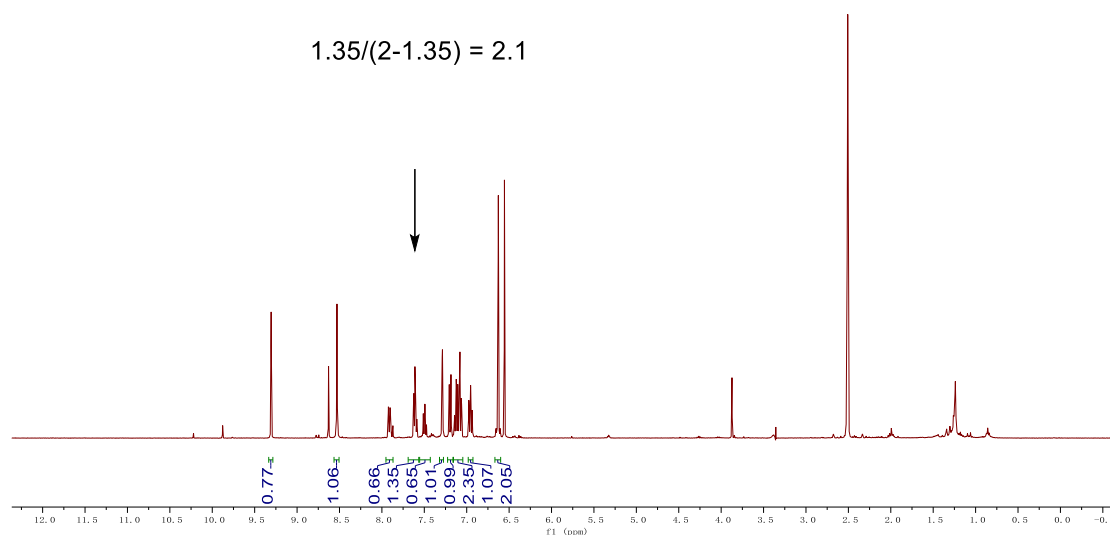

### 3.4 Intermolecular competition experiment

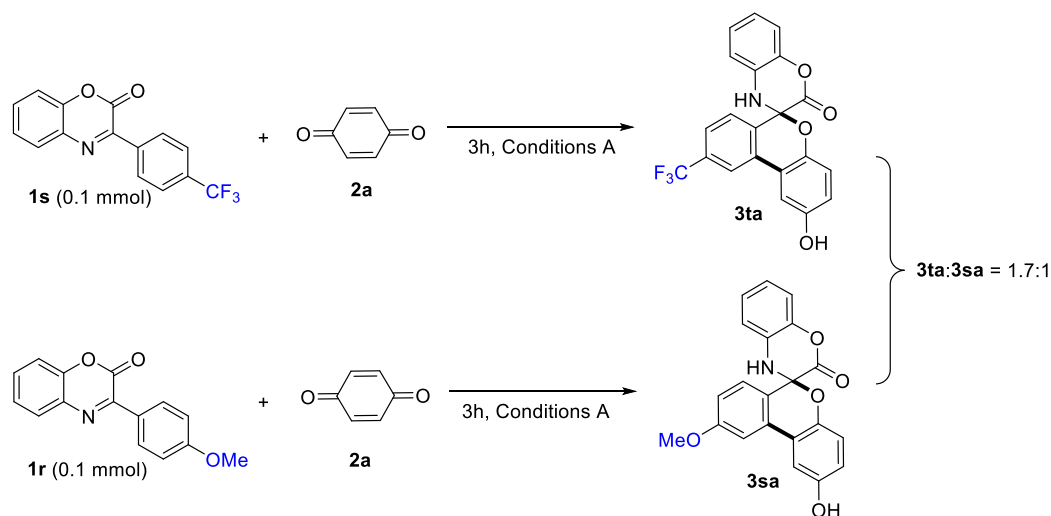

Two independent reactions with **1s** or **1t** under the standard conditions were performed. **1s** (0.1 mmol) or **1t** (0.1 mmol), **2a** (0.15 mmol), AgSbF<sub>6</sub> (16 mol %), Zn(OAc)<sub>2</sub> (0.02 mmol), [RuCl<sub>2</sub>(*p*-cymene)]<sub>2</sub> (4 mol %), and THF (3.0 mL) were stirred side-by-side at 80 °C for 3 hours under nitrogen. Both reactions were quenched and these two mixtures were rapidly combined, and the volatiles were removed under reduced pressure. The residue was purified by silica gel chromatography with 35 mg of **3sa** and **3ta** were recovered. KIE value ( $k_{tsa}/k_{3sa} = 1.7:1$ ) was determined on the basis of <sup>1</sup>H NMR analysis.

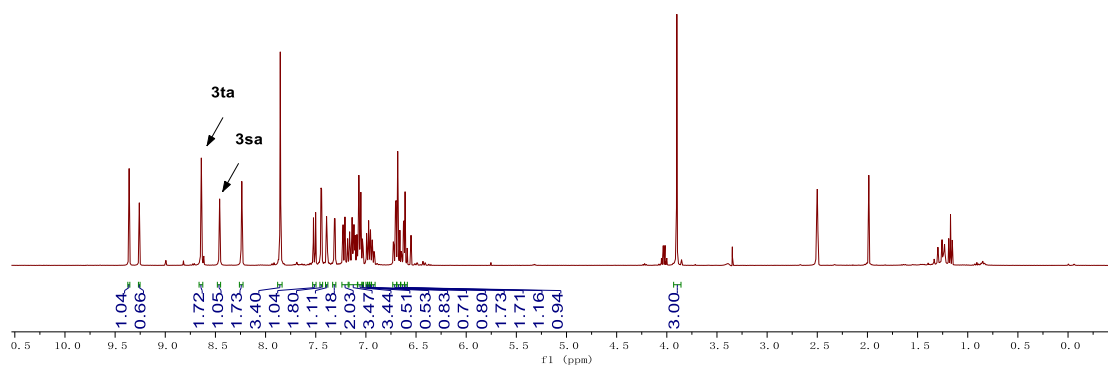

### 3.5 Interconvertible experiment

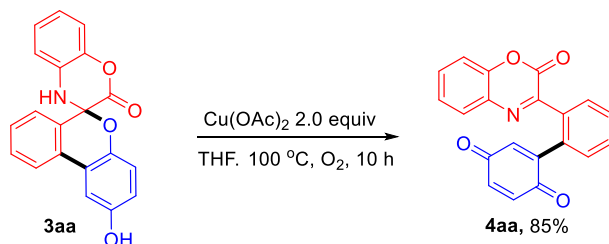

**3aa** (66.2 mg, 0.2 mmol), [RuCl<sub>2</sub>(*p*-cymene)]<sub>2</sub> (4 mol%), AgSbF<sub>6</sub> (16 mol%), Cu(OAc)<sub>2</sub> (0.4 mmol), and THF (3.0 mL) were charged into a pressure tube. The reaction mixture was stirred at 100 °C for 10 hours under the oxygen atmosphere. After the solvent was removed under reduced pressure, the residue was purified by silica gel chromatography using PE/EA (12:1) to afford compound **4aa** (85%, 55.6 mg).

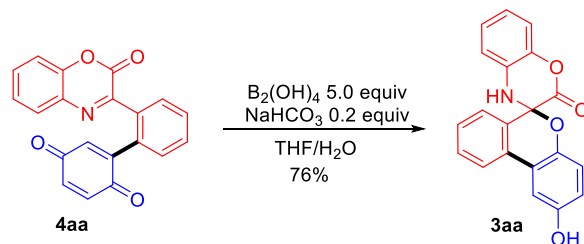

**4aa** (65.8 mg, 0.2 mmol, 1.0 equiv.), B<sub>2</sub>(OH)<sub>4</sub> (89.6 mg, 1 mmol, 5.0 equiv), NaHCO<sub>3</sub> (3.4 mg, 0.04 mmol, 0.2 equiv), H<sub>2</sub>O (0.3 mL) and THF (0.6 mL) were charged into a pressure tube. The reaction mixture was stirred at 60 °C for 6 hours.<sup>5</sup> Then extracted with EtOAc and H<sub>2</sub>O, the organic phase was removed under reduced pressure, the residue was purified by silica gel chromatography using PE/EA (3:1) to afford the desired product **3aa** in 76% yield. (50.3 mg).



#### 4. Characterization Data

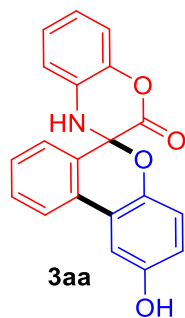

White solid, 56.3 mg, 85 % yield, mp: 206 – 207 °C. **<sup>1</sup>H NMR** (400 MHz, DMSO-*d*<sub>6</sub>)  $\delta$  9.29 (s, 1H), 8.52 (s, 1H), 7.90 (d, *J* = 7.6 Hz, 1H), 7.60 (t, *J* = 7.0 Hz, 2H), 7.53 – 7.45 (m, 1H), 7.28 (s, 1H), 7.19 (dd, *J* = 8.1, 1.3 Hz, 1H), 7.14 – 7.05 (m, 2H), 6.99 – 6.91 (m, 1H), 6.64 – 6.61 (m, 2H). **<sup>13</sup>C NMR** (101 MHz, DMSO-*d*<sub>6</sub>)  $\delta$  159.5, 152.9, 142.5, 140.2, 130.7, 130.3, 130.2, 129.2, 128.3, 126.5, 125.1, 122.3, 121.8, 120.2, 117.9, 116.6, 115.9, 115.8, 109.4, 84.8. **HRMS** [M+H]<sup>+</sup> calculated for C<sub>20</sub>H<sub>14</sub>NO<sub>4</sub><sup>+</sup> = 332.0917, found: 332.0914.

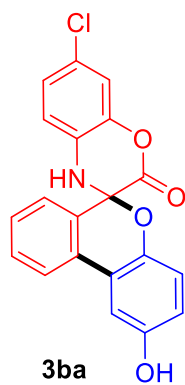

White solid, 57.1 mg, 78 % yield, mp: 206 – 209 °C. **<sup>1</sup>H NMR** (400 MHz, DMSO-*d*<sub>6</sub>)  $\delta$  9.32 (s, 1H), 8.69 (s, 1H), 7.92 (d, *J* = 7.6 Hz, 1H), 7.63 – 7.59 (m, 2H), 7.53 – 7.45 (m, 1H), 7.38 (d, *J* = 2.3 Hz, 1H), 7.29 (d, *J* = 2.1 Hz, 1H), 7.19 (dd, *J* = 8.5, 2.3 Hz, 1H), 7.07 (d, *J* = 8.4 Hz, 1H), 6.67 – 6.62 (m, 2H). **<sup>13</sup>C NMR** (101 MHz, DMSO-*d*<sub>6</sub>)  $\delta$  159.0, 153.1, 142.3, 140.5, 130.7, 130.4, 129.4, 128.8, 128.4, 126.5, 125.0, 123.5, 122.3, 121.8, 118.0, 117.0, 116.7, 116.0, 109.5, 84.4. **HRMS** [M+H]<sup>+</sup> calculated for C<sub>20</sub>H<sub>13</sub>ClNO<sub>4</sub><sup>+</sup> = 366.0528, found: 366.0541.

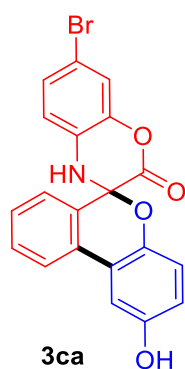

White solid, 65.6 mg, 80 % yield, mp: 197 – 200 °C. **<sup>1</sup>H NMR** (400 MHz, DMSO-*d*<sub>6</sub>)  $\delta$  9.33 (s, 1H), 8.71 (s, 1H), 7.92 (d, *J* = 7.8 Hz, 1H), 7.63 – 7.57 (m, 2H), 7.53 – 7.45 (m, 2H), 7.32 – 7.29 (m, 2H), 7.03 (d, *J* = 8.4 Hz, 1H), 6.68 – 6.66 (m, 2H). **<sup>13</sup>C NMR** (101 MHz, DMSO-*d*<sub>6</sub>)  $\delta$  159.0, 153.1, 142.4, 140.8, 130.7, 130.5, 129.8, 128.8, 128.4, 127.8, 126.5, 122.4, 121.8, 118.7, 118.0, 117.5, 116.8, 110.7, 109.5, 84.5. **HRMS** [M+H]<sup>+</sup> calculated for C<sub>20</sub>H<sub>13</sub>BrNO<sub>4</sub><sup>+</sup> = 410.0022, found: 410.0035.

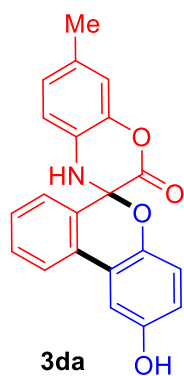

**3da** White solid, 50.37 mg, 73% yield, mp: 195 – 196 °C. <sup>1</sup>H NMR (400 MHz, DMSO-*d*<sub>6</sub>)

$\delta$  9.31 (s, 1H), 8.38 (s, 1H), 7.91 – 7.89 (m, 1H), 7.61 – 7.58 (m, 2H), 7.50 – 7.46 (m, 1H), 7.28 (s, 1H), 7.02 – 6.91 (m, 3H), 6.67– 6.65 (m, 2H), 2.28 (s, 3H). <sup>13</sup>C NMR (101 MHz, DMSO-*d*<sub>6</sub>)  $\delta$  159.7, 152.9, 142.6, 140.1, 130.8, 130.2, 129.5, 129.4, 128.3, 127.6, 126.4, 125.6, 122.2, 121.9, 117.9, 116.6, 116.1, 115.7, 109.4, 84.9, 20.2. HRMS [M+H]<sup>+</sup> calculated for C<sub>21</sub>H<sub>16</sub>NO<sub>4</sub><sup>+</sup> = 346.1074, found: 346.1061.

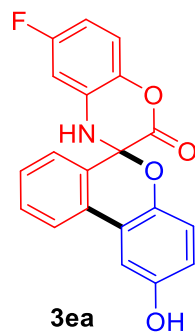

**3ea** White solid, 53.2 mg, 76 % yield, mp: 238 – 240 °C. <sup>1</sup>H NMR (400 MHz, DMSO-*d*<sub>6</sub>)

$\delta$  9.34 (s, 1H), 8.76 (s, 1H), 7.92 (s, 1H), 7.61 – 7.59 (m, 2H), 7.51 – 7.49 (m, 1H), 7.29 – 7.20 (m, 2H), 6.84 – 6.78 (m, 2H), 6.65 – 6.63 (m, 2H). <sup>13</sup>C NMR (101 MHz, DMSO-*d*<sub>6</sub>)  $\delta$  159.2, 159.0 (d, *J* = 239.4 Hz), 153.0 (d, *J* = 14.3 Hz), 142.3, 136.6, 131.5 (d, *J* = 8.5 Hz), 130.6, 130.4, 128.8 (d, *J* = 4.7 Hz), 128.3, 126.4, 122.3, 121.7, 117.9, 117.2 (d, *J* = 10.1 Hz), 116.7 (d, *J* = 9.1 Hz), 109.4 (d, *J* = 7.7 Hz), 106.4 (d, *J* = 24.1 Hz), 102.4 (d, *J* = 28.0 Hz), 84.1 (d, *J* = 7.4 Hz). HRMS [M+H]<sup>+</sup> calculated for C<sub>20</sub>H<sub>13</sub>FNO<sub>4</sub><sup>+</sup> = 350.0823, found: 350.0831.

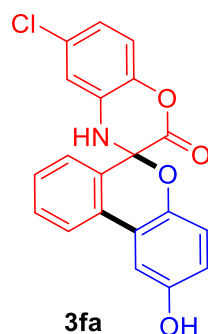

**3fa** White solid, 57.1 mg, 78 % yield, mp: 222 – 224 °C. <sup>1</sup>H NMR (400 MHz, DMSO-*d*<sub>6</sub>)

$\delta$  9.33 (s, 1H), 8.74 (s, 1H), 7.92 (d, *J* = 7.8 Hz, 1H), 7.66 – 7.57 (m, 2H), 7.52 – 7.48 (m, 1H), 7.29 – 7.28 (m, 1H), 7.25 (d, *J* = 8.6 Hz, 1H), 7.06 (d, *J* = 2.4 Hz, 1H), 6.99 (dd, *J* = 8.6, 2.5 Hz, 1H), 6.65 – 6.64 (m, 2H). <sup>13</sup>C NMR (101 MHz, DMSO-*d*<sub>6</sub>)  $\delta$  159.0, 153.1, 142.2, 139.1, 131.6, 131.5, 130.6, 130.5, 128.8, 128.4, 126.5, 122.3, 121.7, 119.8, 118.0, 117.5, 116.7, 115.2, 109.4, 84.2. HRMS [M+H]<sup>+</sup> calculated for C<sub>20</sub>H<sub>13</sub>ClNO<sub>4</sub><sup>+</sup> = 366.0528, found: 366.0537.

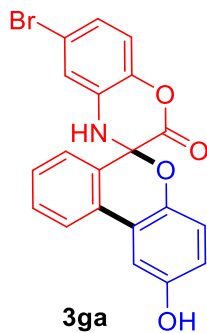

White solid, 69.7 mg, 85 % yield, mp: 222 – 223 °C. **<sup>1</sup>H NMR** (400 MHz, DMSO-*d*<sub>6</sub>) δ 9.33 (s, 1H), 8.73 (s, 1H), 7.92 (d, *J* = 7.8 Hz, 1H), 7.63 – 7.48 (m, 2H), 7.52 – 7.48 (m, 1H), 7.29 (s, 1H), 7.21 – 7.18 (m, 2H), 7.13 – 7.10 (m, 1H), 6.66 – 6.66 (m, 2H). **<sup>13</sup>C NMR** (101 MHz, DMSO-*d*<sub>6</sub>) δ 159.0, 153.1, 142.2, 139.5, 131.9, 130.6, 130.5, 128.8, 128.4, 126.5, 122.7, 122.4, 121.7, 118.0, 118.0, 117.9, 116.7, 116.7, 109.5, 84.2. **HRMS** [M+H]<sup>+</sup> calculated for C<sub>20</sub>H<sub>13</sub>BrNO<sub>4</sub><sup>+</sup> = 410.0022 found: 410.0032.

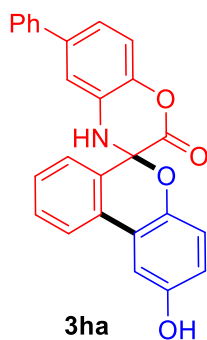

White solid, 62.8 mg, 77 % yield, mp: 228 – 230 °C. **<sup>1</sup>H NMR** (400 MHz, DMSO-*d*<sub>6</sub>) δ 9.31 (s, 1H), 8.65 (s, 1H), 7.92 (d, *J* = 8.0 Hz, 1H), 7.66 – 7.58 (m, 4H), 7.55 – 7.43 (m, 3H), 7.39 – 7.35 (d, *J* = 7.3 Hz, 1H), 7.32 – 7.28 (m, 3H), 7.24 (dd, *J* = 2.1 Hz, 1H), 6.70 – 6.60 (m, 2H). **<sup>13</sup>C NMR** (101 MHz, DMSO-*d*<sub>6</sub>) δ 159.4, 142.5, 139.8, 139.6, 137.4, 130.8, 130.5, 130.4, 130.4, 129.0, 128.4, 127.5, 126.5, 122.3, 121.8, 118.7, 117.9, 116.6, 116.5, 116.4, 113.9, 113.8, 109.4, 84.8. **HRMS** [M+H]<sup>+</sup> calculated for C<sub>26</sub>H<sub>18</sub>NO<sub>4</sub><sup>+</sup> = 408.1230, found: 408.1236.

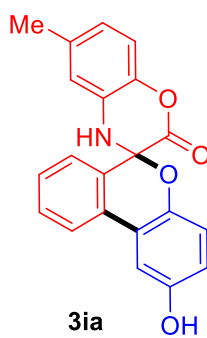

White solid, 47.7 mg, 69 % yield, mp: 234 – 235 °C. **<sup>1</sup>H NMR** (400 MHz, DMSO-*d*<sub>6</sub>) δ 9.30 (s, 1H), 8.44 (s, 1H), 7.91 (d, *J* = 8.1 Hz, 1H), 7.61 – 7.58 (m, 2H), 7.50 – 7.47 (m, 1H), 7.29 (d, *J* = 2.3 Hz, 1H), 7.07 (d, *J* = 8.1 Hz, 1H), 6.86 (d, *J* = 2.0 Hz, 1H), 6.75 (dd, *J* = 8.3, 2.0 Hz, 1H), 6.65–6.61 (m, 2H), 2.27 (s, 3H). **<sup>13</sup>C NMR** (101 MHz, DMSO-*d*<sub>6</sub>) δ 159.6, 152.9, 142.6, 138.2, 134.4, 130.8, 130.3, 129.8, 129.4, 128.3, 126.5, 122.3, 121.8, 120.7, 117.9, 116.6, 116.1, 115.6, 109.4, 84.9, 20.7. **HRMS** [M+H]<sup>+</sup> calculated for C<sub>21</sub>H<sub>16</sub>NO<sub>4</sub><sup>+</sup> = 346.1074, found: 346.1084.

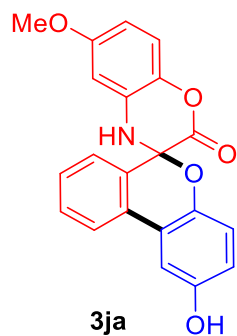

White solid, 52.1 mg, 72 % yield, mp: 249 – 250 °C. **<sup>1</sup>H NMR** (400 MHz, DMSO-*d*<sub>6</sub>) δ 9.30 (s, 1H), 8.49 (s, 1H), 7.91 (dd, *J* = 7.8, 1.9 Hz, 1H), 7.60 (t, *J* = 7.4 Hz, 2H), 7.52 – 7.44 (m, 1H), 7.28 (d, *J* = 1.9 Hz, 1H), 7.12 (dd, *J* = 8.9, 1.9 Hz, 1H), 6.71 – 6.48 (m, 4H), 3.73 (d, *J* = 1.9 Hz, 3H). **<sup>13</sup>C NMR** (101 MHz, DMSO-*d*<sub>6</sub>) δ 159.6, 156.6, 152.9, 142.5, 134.4, 130.9, 130.8, 130.3, 129.3, 128.3, 126.4, 122.3, 121.8, 117.9, 116.6, 116.4, 109.4, 105.2, 101.2, 84.7, 55.3. **HRMS** [M+H]<sup>+</sup> calculated for C<sub>21</sub>H<sub>16</sub>NO<sub>5</sub><sup>+</sup> = 362.1023, found: 362.1023.

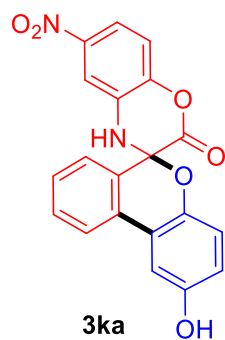

White solid, 62.6 mg, 83 % yield, mp: 245 – 247 °C. **<sup>1</sup>H NMR** (400 MHz, DMSO-*d*<sub>6</sub>) δ 9.32 (s, 1H), 8.74 (s, 1H), 7.92 (d, *J* = 7.7 Hz, 1H), 7.65 – 7.56 (m, 2H), 7.49 (t, *J* = 7.5 Hz, 1H), 7.29 (s, 1H), 7.27 – 7.22 (m, 1H), 6.83 (dd, *J* = 9.5, 3.0 Hz, 1H), 6.77 (td, *J* = 8.7, 2.9 Hz, 1H), 6.64 (d, *J* = 1.5 Hz, 2H). **<sup>13</sup>C NMR** (101 MHz, DMSO-*d*<sub>6</sub>) δ 159.2, 153.1, 142.3, 136.6, 131.6, 130.7, 130.4, 128.9, 128.4, 126.4, 122.3, 121.7, 118.0, 116.7, 109.5, 106.5, 106.3, 102.6, 102.3, 84.2. **HRMS** [M+H]<sup>+</sup> calculated for C<sub>20</sub>H<sub>13</sub>N<sub>2</sub>O<sub>6</sub><sup>+</sup> = 377.0768, found: 377.0846.

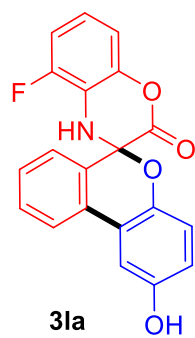

White solid, 56.0 mg, 80 % yield, mp: 246 – 248 °C. **<sup>1</sup>H NMR** (400 MHz, DMSO-*d*<sub>6</sub>) δ 9.33 (s, 1H), 8.75 (s, 1H), 7.92 (d, *J* = 7.8 Hz, 1H), 7.74 – 7.56 (m, 2H), 7.49 (t, *J* = 7.6 Hz, 1H), 7.30 (s, 1H), 7.28 – 7.20 (m, 1H), 6.87 – 6.81 (m, 1H), 6.81 – 6.73 (m, 1H), 6.65 (s, 2H). **<sup>13</sup>C NMR** (101 MHz, DMSO-*d*<sub>6</sub>) δ 159.2, 159.3 (d, *J* = 239.3 Hz), 153.0, 142.3, 136.6 (d, *J* = 2.1 Hz), 131.5 (d, *J* = 11.8 Hz), 130.6, 130.4, 128.9, 128.4, 126.4, 122.3, 121.7, 117.9, 117.2 (d, *J* = 10.2 Hz), 116.7, 109.4, 106.4 (d, *J* = 24.0 Hz), 102.5 (d, *J* = 27.6 Hz), 84.2. **HRMS** [M+H]<sup>+</sup> calculated for C<sub>20</sub>H<sub>13</sub>FNO<sub>4</sub><sup>+</sup> = 350.0823, found: 350.0826.

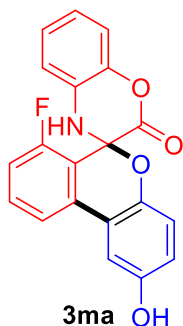

White solid, 27.9 mg, 40 % yield, mp:175 – 177 °C. **<sup>1</sup>H NMR** (400 MHz, DMSO-*d*<sub>6</sub>)  $\delta$  9.36 (s, 1H), 8.48 (s, 1H), 7.83 (d, *J* = 8.0 Hz, 1H), 7.66 – 7.54 (m, 1H), 7.39 – 7.26 (m, 2H), 7.22 (d, *J* = 8.1 Hz, 1H), 7.11 – 7.03 (m, 1H), 6.93 (t, *J* = 7.8 Hz, 1H), 6.85 (d, *J* = 7.8 Hz, 1H), 6.73 (d, *J* = 8.8 Hz, 1H), 6.65 (d, *J* = 8.6 Hz, 1H). **<sup>13</sup>C NMR** (101 MHz, DMSO-*d*<sub>6</sub>)  $\delta$  159.5, 158.7 (d, *J* = 248.1 Hz), 152.9, 141.3, 140.0, 131.9 (d, *J* = 9.2 Hz), 131.5, 131.5, 128.7, 125.5, 119.4, 119.4 (d, *J* = 140.1 Hz), 118.0, 117.8, 116.9 (d, *J* = 13.1 Hz), 116.2, 115.4, 115.1, 109.7, 82.3 (d, *J* = 2.5 Hz). **HRMS** [M+H]<sup>+</sup> calculated for C<sub>20</sub>H<sub>13</sub>O<sub>4</sub>NF<sup>+</sup> = 350.0823, found: 350.0835.

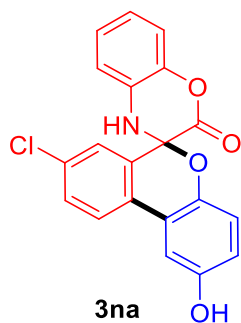

White solid, 35.1 mg, 48 % yield, mp: 217 – 219 °C. **<sup>1</sup>H NMR** (400 MHz, DMSO-*d*<sub>6</sub>)  $\delta$  9.36 (s, 1H), 8.60 (s, 1H), 7.99 – 7.92 (m, 1H), 7.69 – 7.63 (m, 2H), 7.28 (d, *J* = 2.2 Hz, 1H), 7.20 (dd, *J* = 8.1, 1.3 Hz, 1H), 7.15 – 7.11 (m, 1H), 7.06 (dd, *J* = 7.9, 1.7 Hz, 1H), 6.98 – 6.94 (m, 1H), 6.68 – 6.61 (m, 2H). **<sup>13</sup>C NMR** (101 MHz, DMSO-*d*<sub>6</sub>)  $\delta$  159.0, 153.1, 142.4, 140.1, 132.7, 131.0, 130.3, 129.9, 129.8, 126.4, 125.2, 124.5, 121.0, 120.3, 118.1, 117.1, 115.9, 115.9, 109.5, 84.4. **HRMS** [M+H]<sup>+</sup> calculated for C<sub>20</sub>H<sub>13</sub>ClNO<sub>4</sub><sup>+</sup> = 366.0528, found: 366.0531.

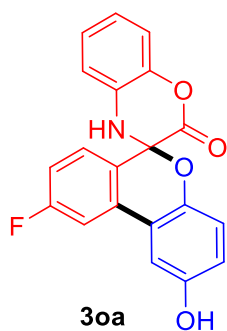

White solid, 44.8 mg, 64 % yield, mp: 237 – 238 °C. **<sup>1</sup>H NMR** (400 MHz, DMSO-*d*<sub>6</sub>)  $\delta$  9.35 (s, 1H), 8.56 (s, 1H), 7.79 (dd, *J* = 10.2, 2.6 Hz, 1H), 7.70 – 7.62 (m, 1H), 7.39 – 7.27 (m, 2H), 7.20 (d, *J* = 8.0 Hz, 1H), 7.16 – 7.03 (m, 2H), 6.99 – 6.91 (m, 1H), 6.70 – 6.60 (m, 2H). **<sup>13</sup>C NMR** (101 MHz, DMSO-*d*<sub>6</sub>)  $\delta$  163.5 (d, *J* = 245.8 Hz), 159.4, 153.0, 142.8, 140.2, 133.6 (d, *J* = 8.8 Hz), 130.0, 129.2 (d, *J* = 8.9 Hz), 125.5 (d, *J* = 2.9 Hz), 125.2, 121.1, 121.1, 120.3, 118.0, 117.5, 115.9, 115.1 (d, *J* = 22.1 Hz), 110.0, 109.2 (d, *J* = 23.4 Hz), 84.7. **HRMS** [M+H]<sup>+</sup> calculated for C<sub>20</sub>H<sub>13</sub>FNO<sub>4</sub><sup>+</sup> = 350.0823, found: 350.0829.

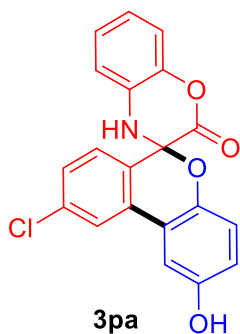

White solid, 52.7 mg, 72 % yield, mp: 238 – 240 °C. **<sup>1</sup>H NMR** (400 MHz, DMSO-*d*<sub>6</sub>) δ 9.34 (s, 1H), 8.58 (s, 1H), 7.99 (d, *J* = 2.1 Hz, 1H), 7.63 (d, *J* = 8.4 Hz, 1H), 7.54 (dd, *J* = 8.4, 2.1 Hz, 1H), 7.33 (d, *J* = 2.6 Hz, 1H), 7.20 (dd, *J* = 8.1, 1.3 Hz, 1H), 7.14 – 7.10 (m, 1H), 7.06 (dd, *J* = 7.9, 1.7 Hz, 1H), 6.98 – 6.93 (m, 1H), 6.70 – 6.61 (m, 2H). **<sup>13</sup>C NMR** (101 MHz, DMSO-*d*<sub>6</sub>) δ 159.3, 153.1, 142.7, 140.1, 135.4, 133.0, 129.9, 128.7, 128.0, 128.0, 125.2, 122.1, 120.7, 120.3, 118.1, 117.5, 115.9, 109.9, 84.6. **HRMS** [M+H]<sup>+</sup> calculated for C<sub>20</sub>H<sub>13</sub>ClNO<sub>4</sub><sup>+</sup> = 366.0528, found: 366.0536.

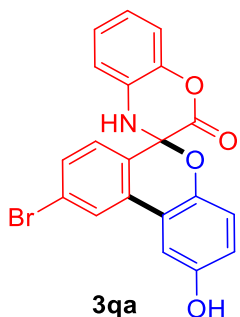

White solid, 58.2 mg, 71 % yield, mp: 233 – 234 °C. **<sup>1</sup>H NMR** (400 MHz, DMSO-*d*<sub>6</sub>) δ 9.33 (s, 1H), 8.57 (s, 1H), 8.11 (d, *J* = 2.0 Hz, 1H), 7.69 – 7.67 (m, 1H), 7.56 – 7.54 (m, 1H), 7.33 (d, *J* = 2.7 Hz, 1H), 7.20 (d, *J* = 8.0 Hz, 1H), 7.14 – 7.11 (m, 1H), 7.06 (dd, *J* = 7.9, 1.6 Hz, 1H), 6.98 – 6.93 (m, 1H), 6.72 – 6.60 (m, 2H). **<sup>13</sup>C NMR** (101 MHz, DMSO-*d*<sub>6</sub>) δ 159.2, 153.1, 142.7, 140.1, 133.2, 131.0, 129.9, 128.9, 128.3, 125.2, 125.0, 124.1, 120.6, 120.3, 118.1, 117.5, 115.9, 109.8, 84.6. **HRMS** [M+H]<sup>+</sup> calculated for C<sub>20</sub>H<sub>13</sub>BrNO<sub>4</sub><sup>+</sup> = 410.0022, found: 410.0025.

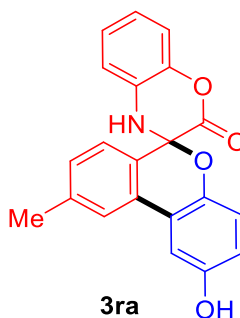

White solid, 51.2 mg, 74 % yield, mp: 226 – 228 °C. **<sup>1</sup>H NMR** (400 MHz, DMSO-*d*<sub>6</sub>) δ 9.25 (s, 1H), 8.47 (s, 1H), 7.72 (s, 1H), 7.48 (d, *J* = 7.9 Hz, 1H), 7.32 – 7.21 (m, 2H), 7.18 (d, *J* = 8.1 Hz, 1H), 7.15 – 7.03 (m, 2H), 6.95 – 6.92 (m, 1H), 6.64 – 6.59 (s, 2H), 2.44 (s, 3H). **<sup>13</sup>C NMR** (101 MHz, DMSO-*d*<sub>6</sub>) δ 159.6, 152.9, 142.7, 140.2, 139.8, 130.6, 130.2, 128.9, 126.5, 126.4, 125.1, 122.6, 121.9, 120.1, 117.8, 116.5, 115.9, 115.8, 109.4, 84.8, 21.0. **HRMS** [M+H]<sup>+</sup> calculated for C<sub>21</sub>H<sub>16</sub>NO<sub>4</sub><sup>+</sup> = 346.1074, found: 346.1071.

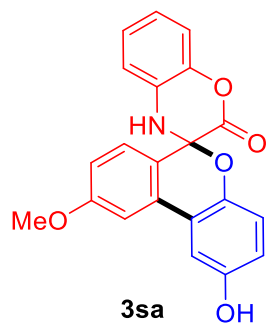

White solid, 42.7 mg, 59 % yield, mp: 220 – 222 °C. **<sup>1</sup>H NMR** (400 MHz, DMSO-*d*<sub>6</sub>) δ 9.28 (s, 1H), 8.46 (s, 1H), 7.51 (d, *J* = 8.6 Hz, 1H), 7.39 (d, *J* = 2.6 Hz, 1H), 7.31 (d, *J* = 2.6 Hz, 1H), 7.17 (dd, *J* = 8.0, 1.3 Hz, 1H), 7.13 – 7.02 (m, 3H), 6.96 – 6.91 (m, 1H), 6.67 – 6.57 (m, 2H), 3.89 (s, 3H). **<sup>13</sup>C NMR** (101 MHz, DMSO-*d*<sub>6</sub>) δ 160.7, 159.8, 152.9, 142.9, 140.2, 132.4, 130.2, 128.0, 125.1, 121.8, 121.7, 120.1, 117.8, 116.8, 115.9, 115.8, 114.2, 109.7, 107.1, 84.8, 55.5. **HRMS** [M+H]<sup>+</sup> calculated for C<sub>21</sub>H<sub>16</sub>NO<sub>5</sub><sup>+</sup> = 362.1023, found: 362.1028.

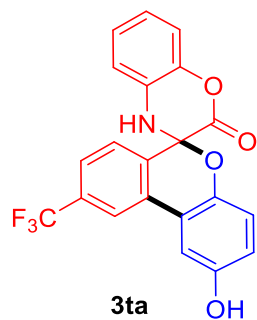

White solid, 49.5 mg, 62% yield, mp: 156 – 157 °C. **<sup>1</sup>H NMR** (400 MHz, DMSO-*d*<sub>6</sub>) δ 9.37 (s, 1H), 8.65 (s, 1H), 8.24 (s, 1H), 7.88 – 7.84 (m, 2H), 7.45 (d, *J* = 2.6 Hz, 1H), 7.22 (dd, *J* = 8.2, 1.3 Hz, 1H), 7.16 – 7.12 (m, 1H), 7.06 (dd, *J* = 7.9, 1.6 Hz, 1H), 6.99 – 6.95 (m, 1H), 6.75 – 6.64 (m, 2H). **<sup>13</sup>C NMR** (101 MHz, DMSO-*d*<sub>6</sub>) δ 159.1, 153.2, 141.4 (d, *J* = 248.0 Hz), 133.0, 132.1, 131.0 (d, *J* = 32.1 Hz), 129.7, 128.0, 125.3, 125.3, 124.8, 122.6, 120.6, 120.4, 119.2, 119.1, 118.2, 117.8, 116.0 (d, *J* = 6.9 Hz), 110.0, 84.6. **HRMS** [M+H]<sup>+</sup> calculated for C<sub>21</sub>H<sub>13</sub>F<sub>3</sub>NO<sub>4</sub><sup>+</sup> = 400.0791, found: 400.0800.

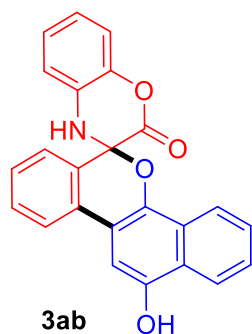

White solid, 40.5 mg, 53 % yield, mp: 210 – 212 °C. **<sup>1</sup>H NMR** (400 MHz, DMSO-*d*<sub>6</sub>) δ 10.07 (s, 1H), 8.68 (s, 1H), 8.08 (d, *J* = 8.3 Hz, 1H), 7.88 (d, *J* = 7.9 Hz, 1H), , 7.71 – 7.63 (m, 2H), 7.57 – 7.49 (m, 1H), 7.46 – 7.39 (m, 2H), 7.38 – 7.33 (m, 1H), 7.31 (s, 1H), 7.26 (d, *J* = 7.9 Hz, 1H), 7.17 – 7.07 (m, 2H), 7.38 – 7.33 (m, 1H). **<sup>13</sup>C NMR** (101 MHz, DMSO-*d*<sub>6</sub>) δ 159.7, 148.6, 140.5, 137.3, 131.0, 130.5, 130.2, 128.9, 128.2, 126.7, 126.6, 125.8, 125.6, 125.5, 125.2, 122.4, 122.2, 120.6, 120.4, 116.2, 116.1, 115.7, 101.9, 85.1. **HRMS** [M-H]<sup>-</sup> calculated for C<sub>24</sub>H<sub>14</sub>NO<sub>4</sub><sup>-</sup> = 380.0928, found: 380.0926.

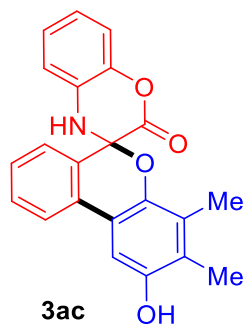

White solid, 52.6 mg, 73 % yield, mp: 217 – 218 °C. **<sup>1</sup>H NMR** (400 MHz, DMSO-*d*<sub>6</sub>) δ 9.13 (s, 1H), 8.46 (s, 1H), 7.80 – 7.73 (m, 1H), 7.64 – 7.55 (m, 2H), 7.48 – 7.44 (m, 1H), 7.20 (dd, *J* = 8.0, 1.3 Hz, 1H), 7.16 – 7.04 (m, 3H), 6.99 – 6.94 (m, 1H), 2.01 (s, 3H), 1.68 (s, 3H). **<sup>13</sup>C NMR** (101 MHz, DMSO-*d*<sub>6</sub>) δ 160.0, 150.5, 140.6, 140.1, 131.4, 130.5, 130.2, 129.1, 127.7, 126.2, 126.2, 125.0, 125.0, 121.9, 120.4, 118.9, 116.1, 115.5, 106.2, 84.4, 12.1, 11.0. **HRMS** [M+H]<sup>+</sup> calculated for C<sub>22</sub>H<sub>18</sub>NO<sub>4</sub><sup>+</sup> = 360.1230, found: 360.1225.

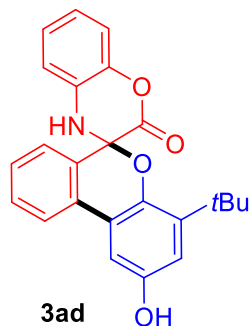

White solid, 32.5 mg, 42% yield, mp: 217 – 220 °C. **<sup>1</sup>H NMR** (400 MHz, DMSO-*d*<sub>6</sub>) δ 9.13 (s, 1H), 8.52 (s, 1H), 7.86 (d, *J* = 7.8 Hz, 1H), 7.63 – 7.54 (m, 2H), 7.49 – 7.45 (m, 1H), 7.15 – 7.06 (m, 4H), 6.96 – 6.62 (m, 1H), 6.66 (d, *J* = 2.8 Hz, 1H), 0.98 (s, 9H). **<sup>13</sup>C NMR** (101 MHz, DMSO-*d*<sub>6</sub>) δ 159.6, 151.9, 141.2, 140.2, 139.3, 131.2, 130.6, 130.2, 128.8, 128.1, 126.1, 125.2, 122.6, 121.9, 120.2, 115.9, 115.9, 114.8, 107.2, 84.5, 34.0, 29.4. **HRMS** [M+H]<sup>+</sup> calculated for C<sub>24</sub>H<sub>22</sub>NO<sub>4</sub><sup>+</sup> = 388.1543, found: 388.1550.

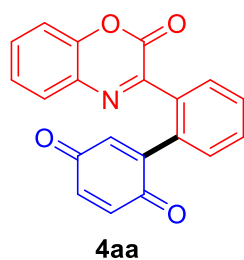

Yellow solid, 36.3 mg, 55 % yield, mp: 156 – 157 °C. **<sup>1</sup>H NMR** (400 MHz, CDCl<sub>3</sub>) δ 8.14 – 8.05 (m, 1H), 7.66 – 7.56 (m, 3H), 7.53 – 7.49 (m, 1H), 7.45 – 7.40 (m, 1H), 7.35 – 7.30 (m, 2H), 6.84 (d, *J* = 2.5 Hz, 1H), 6.77 (dd, *J* = 10.1, 2.5 Hz, 1H), 6.67 (d, *J* = 10.1 Hz, 1H). **<sup>13</sup>C NMR** (101 MHz, CDCl<sub>3</sub>) δ 187.5, 186.2, 152.7, 152.3, 148.8, 146.6, 136.7, 136.6, 133.9, 133.3, 132.9, 131.7, 131.2, 131.0, 130.8, 130.8, 129.8, 129.1, 125.8, 116.6. **HRMS** [M+H]<sup>+</sup> calculated for C<sub>20</sub>H<sub>12</sub>NO<sub>4</sub><sup>+</sup> = 330.0761, found: 330.0758.



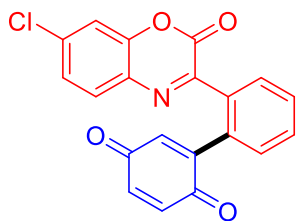

**4ba**

Yellow solid, 34.2 mg, 47 % yield, mp: 180 – 183 °C.  $^1\text{H NMR}$  (400 MHz,  $\text{CDCl}_3$ )  $\delta$  8.11 – 8.02 (m, 1H), 7.67 – 7.57 (m, 2H), 7.51 (d,  $J = 8.4$  Hz, 1H), 7.47 – 7.39 (m, 1H), 7.35 – 7.26 (m, 2H), 6.84 (d,  $J = 2.6$  Hz, 1H), 6.78 (dd,  $J = 10.1, 2.6$  Hz, 1H), 6.66 (d,  $J = 10.0$  Hz, 1H).  $^{13}\text{C NMR}$  (101 MHz,  $\text{CDCl}_3$ )  $\delta$  187.5, 186.2, 152.6, 151.5, 148.5, 146.9, 137.5, 136.6, 133.7, 133.2, 133.1, 131.2, 130.8, 130.8, 129.8, 129.8, 126.4, 116.9 (two signals was missing due to overlap). **HRMS**  $[\text{M}+\text{H}]^+$  calculated for  $\text{C}_{20}\text{H}_{11}\text{ClNO}_4^+$  = 364.0371, found: 364.0367.

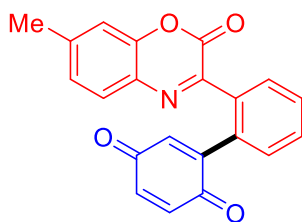

**4da**

Yellow solid, 39.9 mg, 58 % yield, mp: 156 – 157 °C.  $^1\text{H NMR}$  (400 MHz,  $\text{CDCl}_3$ )  $\delta$  8.10 – 8.05 (m, 1H), 7.62 – 7.54 (m, 2H), 7.45 (d,  $J = 8.1$  Hz, 1H), 7.41 – 7.39 (m, 1H), 7.16 – 7.10 (m, 1H), 7.09 (s, 1H), 6.80 (d,  $J = 2.6$  Hz, 1H), 6.75 (dd,  $J = 10.1, 2.5$  Hz, 1H), 6.65 (d,  $J = 10.1$  Hz, 1H), 2.46 (s, 3H).  $^{13}\text{C NMR}$  (101 MHz,  $\text{CDCl}_3$ )  $\delta$  187.5, 186.1, 152.4, 151.3, 148.8, 146.4, 143.2, 136.7, 136.5, 134.0, 133.2, 132.8, 130.7, 130.7, 129.7, 129.2, 128.6, 126.9, 116.6, 21.9. **HRMS**  $[\text{M}+\text{H}]^+$  calculated for  $\text{C}_{21}\text{H}_{14}\text{NO}_4^+$  = 344.0917, found: 344.0920.

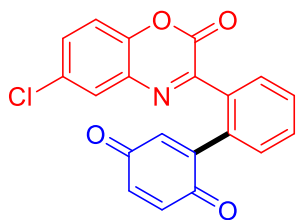

**4fa**

Yellow solid, 34.9 mg, 48 % yield, mp: 118 – 120 °C.  $^1\text{H NMR}$  (400 MHz,  $\text{CDCl}_3$ )  $\delta$  8.08 – 8.02 (m, 1H), 7.63 – 7.61 (m, 2H), 7.57 (d,  $J = 2.5$  Hz, 1H), 7.47 – 7.42 (m, 2H), 7.26 (d,  $J = 8.6$  Hz, 1H), 6.85 (d,  $J = 2.6$  Hz, 1H), 6.80 (dd,  $J = 10.1, 2.6$  Hz, 1H), 6.67 (d,  $J = 10.0$  Hz, 1H).  $^{13}\text{C NMR}$  (101 MHz,  $\text{CDCl}_3$ )  $\delta$  187.5, 186.2, 153.9, 151.7, 148.4, 145.2, 136.7, 136.6, 133.6, 133.2, 133.2, 131.7, 131.6, 131.3, 130.9, 130.9, 130.9, 129.8, 128.4, 117.8. **HRMS**  $[\text{M}+\text{H}]^+$  calculated for  $\text{C}_{20}\text{H}_{11}\text{ClNO}_4^+$  = 364.0371, found: 364.0380.

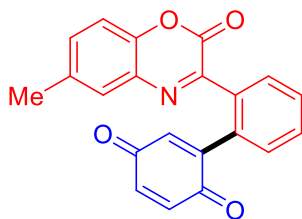

**4ia**

Yellow solid, 29.6 mg, 43 % yield, mp: 120 – 121 °C.  $^1\text{H NMR}$  (400 MHz,  $\text{CDCl}_3$ )  $\delta$  8.11 – 8.03 (m, 1H), 7.63 – 7.56 (m, 2H), 7.45 – 7.39 (m, 1H), 7.37 (s, 1H), 7.34 – 7.27 (m,

1H), 7.19 (d,  $J = 8.4$  Hz, 1H), 6.83 (d,  $J = 2.5$  Hz, 1H), 6.77 (dd,  $J = 10.1, 2.5$  Hz, 1H), 6.67 (d,  $J = 9.9$  Hz, 1H), 2.41 (s, 3H).  $^{13}\text{C}$  NMR (101 MHz,  $\text{CDCl}_3$ )  $\delta$  187.6, 186.1, 152.6, 152.5, 148.7, 144.5, 136.7, 136.5, 135.8, 134.1, 133.2, 132.9, 132.7, 131.0, 130.8, 130.8, 130.7, 129.8, 128.9, 116.2, 20.9. HRMS  $[\text{M}+\text{H}]^+$  calculated for  $\text{C}_{21}\text{H}_{14}\text{NO}_4^+$  = 344.0917, found: 344.0919.

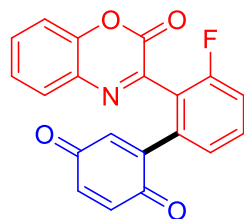

**4ma**

Yellow solid, 34.1 mg, 49 % yield, mp: 147 – 148 °C.  $^1\text{H}$  NMR (400 MHz,  $\text{CDCl}_3$ )  $\delta$  7.62 – 7.52 (m, 3H), 7.38 – 7.29 (m, 3H), 7.29 – 7.21 (m, 1H), 6.94 – 6.90 (m, 1H), 6.75 – 6.71 (m, 1H), 6.59 (dd,  $J = 10.1, 2.0$  Hz, 1H).  $^{13}\text{C}$  NMR (101 MHz,  $\text{CDCl}_3$ )  $\delta$  187.1, 185.9, 161.0 (d,  $J = 251.8$  Hz), 151.5, 151.1, 146.8, 146.0 (d,  $J = 2.5$  Hz), 136.5, 135.1, 134.9 (d,  $J = 3.3$  Hz), 132.2, 132.2, 132.1, 130.9, 129.3, 126.2 (d,  $J = 3.2$  Hz), 125.7, 122.8 (d,  $J = 16.3$  Hz), 117.8 (d,  $J = 22.0$  Hz), 116.8. HRMS  $[\text{M}+\text{H}]^+$  calculated for  $\text{C}_{20}\text{H}_{11}\text{FNO}_4^+$  = 348.0667, found: 348.0670.

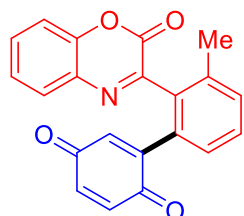

**4ua**

Yellow solid, 44.1 mg, 64 % yield, mp: 156 – 157 °C.  $^1\text{H}$  NMR (400 MHz,  $\text{CDCl}_3$ )  $\delta$  7.65 (d,  $J = 7.7$  Hz, 1H), 7.56 – 7.51 (m, 1H), 7.51 – 7.45 (m, 2H), 7.37 – 7.32 (m, 2H), 7.24 (dd,  $J = 7.5, 1.4$  Hz, 1H), 6.81 (d,  $J = 2.5$  Hz, 1H), 6.67 (dd,  $J = 10.1, 2.6$  Hz, 1H), 6.57 (d,  $J = 10.1$  Hz, 1H), 2.38 (s, 3H).  $^{13}\text{C}$  NMR (101 MHz,  $\text{CDCl}_3$ )  $\delta$  187.6, 186.0, 161.6, 152.4, 151.4, 149.6, 146.4, 136.9, 136.6, 135.5, 133.0, 132.2, 131.2, 131.2, 128.8, 126.2, 125.7, 116.9, 116.5, 114.6, 55.8. HRMS  $[\text{M}+\text{H}]^+$  calculated for  $\text{C}_{21}\text{H}_{14}\text{NO}_4^+$  = 344.0917, found: 344.0920.

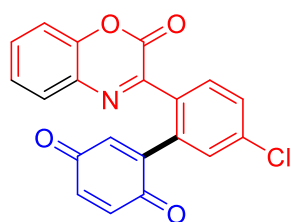

**4oa**

Yellow solid, 38.6 mg, 53 % yield, mp: 176 – 178 °C.  $^1\text{H}$  NMR (400 MHz,  $\text{CDCl}_3$ )  $\delta$  8.09 (d,  $J = 8.4$  Hz, 1H), 7.60 – 7.50 (m, 3H), 7.41 (d,  $J = 2.2$  Hz, 1H), 7.37 – 7.29 (m, 2H), 6.84 – 6.78 (m, 2H), 6.69 (d,  $J = 9.8$  Hz, 1H).  $^{13}\text{C}$  NMR (101 MHz,  $\text{CDCl}_3$ )  $\delta$  187.2, 185.7, 152.1, 151.4, 147.8, 146.6, 137.2, 136.7, 136.7, 135.1, 133.0, 132.3, 132.2, 132.0, 131.1, 130.7, 129.8, 129.1, 125.9, 116.7. HRMS  $[\text{M}+\text{H}]^+$  calculated for  $\text{C}_{20}\text{H}_{11}\text{ClNO}_4^+$  = 364.0371, found: 364.0365.

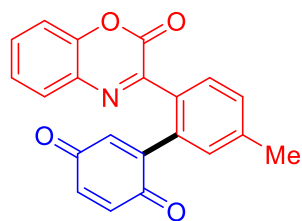

**4qa**

Yellow solid, 33.7 mg, 49 % yield, mp: 172 – 174 °C. <sup>1</sup>H NMR (400 MHz, CDCl<sub>3</sub>) δ 8.04 (d, *J* = 8.1 Hz, 1H), 7.56 (dd, *J* = 7.9, 1.6 Hz, 1H), 7.51 – 7.47 (m, 1H), 7.41 (dd, *J* = 8.1, 1.8 Hz, 1H), 7.36 – 7.27 (m, 2H), 7.22 (d, *J* = 1.8 Hz, 1H), 6.83 – 6.74 (m, 2H), 6.67 (d, *J* = 9.9 Hz, 1H), 2.47 (s, 3H). <sup>13</sup>C NMR (101 MHz, CDCl<sub>3</sub>) δ 187.6, 186.3, 152.3, 152.3, 149.2, 146.5, 141.6, 136.8, 136.6, 133.4, 132.5, 131.5, 131.2, 131.1, 130.9, 130.5, 129.0, 125.7, 116.5, 21.6. HRMS [M+H]<sup>+</sup> calculated for C<sub>21</sub>H<sub>14</sub>NO<sub>4</sub><sup>+</sup> = 344.0917, found: 344.0915.

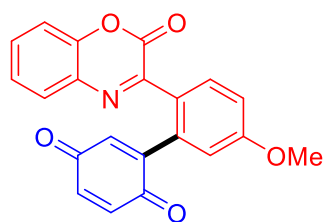

**4sa**

Yellow solid, 34.6 mg, 48 % yield, mp: 156 – 157 °C. <sup>1</sup>H NMR (400 MHz, CDCl<sub>3</sub>) δ 8.21 (d, *J* = 8.8 Hz, 1H), 7.52 (dd, *J* = 7.9, 1.6 Hz, 1H), 7.50 – 7.45 (m, 1H), 7.56 – 7.43 (m, 2H), 7.35 – 7.25 (m, 2H), 7.10 (dd, *J* = 8.8, 2.7 Hz, 1H), 6.91 (d, *J* = 2.6 Hz, 1H), 6.81 – 6.76 (m, 2H), 6.74 – 6.67 (m, 1H), 3.91 (s, 3H). <sup>13</sup>C NMR (101 MHz, CDCl<sub>3</sub>) δ 187.3, 186.4, 155.1, 152.1, 147.5, 146.8, 138.1, 136.5, 136.4, 135.0, 133.5, 133.3, 132.5, 131.8, 130.8, 130.1, 129.3, 128.1, 125.8, 116.8, 20.5. HRMS [M+H]<sup>+</sup> calculated for C<sub>21</sub>H<sub>14</sub>NO<sub>5</sub><sup>+</sup> = 360.0866, found: 360.0873.

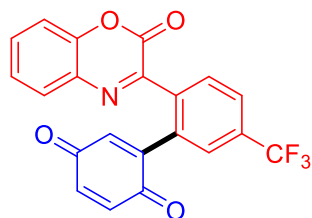

**4ta**

Yellow solid, 34.1 mg, 43 % yield, mp: 156 – 157 °C. <sup>1</sup>H NMR (400 MHz, CDCl<sub>3</sub>) δ 8.22 (d, *J* = 8.2 Hz, 1H), 7.86 (dd, *J* = 8.4, 1.8 Hz, 1H), 7.68 (d, *J* = 1.8 Hz, 1H), 7.61 (dd, *J* = 7.9, 1.6 Hz, 1H), 7.58 – 7.53 (m, 1H), 7.41 – 7.31 (m, 2H), 6.88 (d, *J* = 2.5 Hz, 1H), 6.80 (dd, *J* = 10.1, 2.5 Hz, 1H), 6.69 (d, *J* = 10.1 Hz, 1H). <sup>13</sup>C NMR (101 MHz, CDCl<sub>3</sub>) δ 187.1, 185.6, 152.0, 151.5, 147.4, 146.7, 137.1 (d, *J* = 1.5 Hz), 136.8, 136.6, 134.0, 133.5, 132.8 (q, *J* = 33.2 Hz), 132.4, 131.4, 131.1, 129.4, 127.6 (d, *J* = 3.9 Hz), 126.5 (d, *J* = 3.7 Hz), 126.1, 123.5 (q, *J* = 272.8 Hz), 116.8. HRMS [M+H]<sup>+</sup> calculated for C<sub>21</sub>H<sub>11</sub>F<sub>3</sub>NO<sub>4</sub><sup>+</sup> = 398.0635, found: 398.0623.

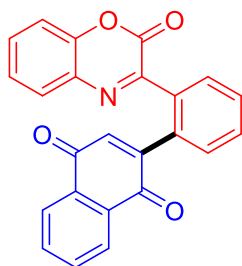

**4ab**

Yellow solid, 31.8 mg, 42 % yield, mp:108–111 °C.  $^1\text{H NMR}$  (400 MHz, DMSO- $d_6$ )  $\delta$  8.08 – 8.03 (m, 1H), 8.00 (d,  $J = 7.7$  Hz, 1H), 7.89 – 7.79 (m, 1H), 7.76 – 7.73 (m, 2H), 7.70 – 7.65 (m, 2H), 7.63 – 7.59 (m, 1H), 7.54 – 7.47 (m, 1H), 7.42 – 7.40 (m, 1H), 7.26 – 7.15 (m, 2H), 7.11 (s, 1H).  $^{13}\text{C NMR}$  (101 MHz, DMSO- $d_6$ )  $\delta$  184.4, 184.1, 153.1, 152.0, 149.8, 146.1, 135.1, 134.3, 134.2, 133.7, 133.6, 131.6, 131.4, 131.3, 130.6, 130.5, 130.4, 128.9, 128.1, 126.2, 125.6, 125.4, 116.1. **HRMS**  $[\text{M}+\text{Na}]^+$  calculated for  $\text{C}_{24}\text{H}_{13}\text{O}_4\text{NNa}^+$  = 402.0737, found: 402.0747.

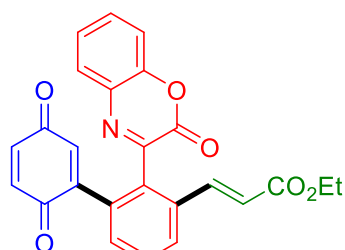

**6aa**

Yellow solid, 28.2 mg, 33 % yield, mp: 123 – 126 °C.  $^1\text{H NMR}$  (400 MHz,  $\text{CDCl}_3$ )  $\delta$  7.82 (d,  $J = 7.9$ , 1H), 7.71 – 7.64 (m, 2H), 7.64 – 7.58 (m, 1H), 7.57 – 7.53 (m, 1H), 7.42 (d,  $J = 7.6$  Hz, 1H), 7.40 – 7.32 (m, 2H), 6.78 (d,  $J = 2.5$  Hz, 1H), 6.69 (dd,  $J = 10.1, 2.5$  Hz, 1H), 6.60 (d,  $J = 10.1$  Hz, 1H), 6.41 (d,  $J = 15.7$  Hz, 1H), 4.19 (q,  $J = 7.1$  Hz, 2H), 1.27 (t,  $J = 7.1$  Hz, 3H).  $^{13}\text{C NMR}$  (101 MHz,  $\text{CDCl}_3$ )  $\delta$  187.0, 186.0, 166.3, 153.3, 152.2, 146.8, 146.8, 141.6, 136.5, 136.4, 135.5, 135.0, 134.1, 133.5, 132.3, 131.7, 130.9, 130.4, 129.5, 128.6, 126.0, 122.1, 116.9, 60.8, 14.3. **HRMS**  $[\text{M}+\text{Na}]^+$  calculated for  $\text{C}_{25}\text{H}_{17}\text{O}_6\text{NNa}^+$  = 450.0948, found: 450.0941.

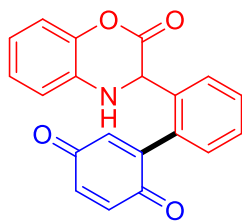

**7aa**

Yellow solid, 52.9 mg, 80 % yield, mp: 175 – 177 °C.  $^1\text{H NMR}$  (400 MHz, DMSO- $d_6$ )  $\delta$  11.45 (s, 1H), 9.38 (s, 1H), 7.98 (d,  $J = 8.0$  Hz, 1H), 7.64 – 7.57 (m, 1H), 7.47 – 7.44 (m, 2H), 7.39 (d,  $J = 2.3$  Hz, 1H), 7.13 – 7.04 (m, 2H), 6.98 – 6.92 (m, 1H), 6.85 (d,  $J = 8.0$  Hz, 1H), 6.72 – 6.67 (m, 2H).  $^{13}\text{C NMR}$  (101 MHz, DMSO- $d_6$ )  $\delta$  152.2, 144.1, 139.9, 132.4, 131.7, 130.0, 129.2, 128.3, 127.6, 122.0, 121.8, 121.2, 119.5, 118.2, 116.9, 116.4, 114.9, 109.1, 87.0, 84.9. **HRMS**  $[\text{M}+\text{Na}]^+$  calculated for  $\text{C}_{20}\text{H}_{13}\text{O}_4\text{NNa}^+$  = 354.0737, found: 354.0739.

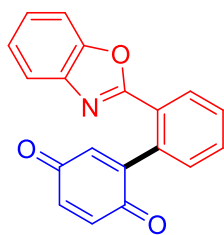

**8aa**

Red solid, 24 mg, 40 % yield, mp: 95 –97 °C.  $^1\text{H NMR}$  (400 MHz, Acetone- $d_6$ )  $\delta$  7.96 (d,  $J = 7.5$  Hz, 1H), 7.44 – 7.40 (m, 1H), 7.18 – 7.14 (m, 1H), 7.06 – 7.00 (m, 3H), 6.99 – 6.92 (m, 3H), 6.90 (d,  $J = 7.7$  Hz, 1H), 6.70 (d,  $J = 8.7$  Hz, 1H).  $^{13}\text{C NMR}$  (101 MHz, Acetone- $d_6$ )  $\delta$  169.0, 151.9, 148.2, 147.0, 144.2, 137.7, 135.6, 133.3, 131.9, 127.6, 127.1, 126.9, 125.1, 125.1, 123.5, 121.8, 120.8, 118.5, 117.3. **HRMS**  $[\text{M}+\text{H}]^+$  calculated for  $\text{C}_{19}\text{H}_{12}\text{O}_3\text{N}^+$  = 302.0812, found: 302.0810.

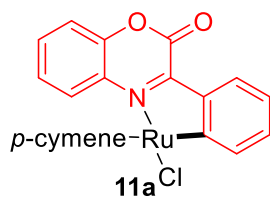

**11a**

Red solid, 49 % yield,  $^1\text{H NMR}$  (400 MHz,  $\text{CDCl}_3$ )  $\delta$  8.92 (dd,  $J = 8.2, 1.6$  Hz, 1H), 8.85 (dd,  $J = 8.0, 1.5$  Hz, 1H), 8.26 (dd,  $J = 7.6, 1.2$  Hz, 1H), 7.56 – 7.51 (m, 1H), 7.50 – 7.46 (m, 1H), 7.36 (dd,  $J = 8.0, 1.6$  Hz, 1H), 7.23 (dd,  $J = 7.5, 1.5$  Hz, 1H), 7.17 – 7.12 (m, 1H), 5.76 (dd,  $J = 6.2, 1.4$  Hz, 1H), 5.70 (dd,  $J = 6.1, 1.4$  Hz, 1H), 5.30 – 5.26 (m, 2H), 2.29 – 2.22 (m, 1H), 2.13 (s, 1H), 0.94 (d,  $J = 6.9$  Hz, 3H), 0.84 (d,  $J = 6.9$  Hz, 3H).  $^{13}\text{C NMR}$  (101 MHz,  $\text{CDCl}_3$ )  $\delta$  195.5 ( $\text{C}_q$ ), 158.4 ( $\text{C}_q$ ), 150.2 ( $\text{C}_q$ ), 144.2 ( $\text{C}_q$ ), 142.7 ( $\text{C}_q$ ), 139.3 (CH), 133.9 ( $\text{C}_q$ ), 133.8 (CH), 131.0 (CH), 130.6 (CH), 128.7 (CH), 125.2 (CH), 123.5 (CH), 116.5 (CH), 103.9 ( $\text{C}_q$ ), 102.8 ( $\text{C}_q$ ), 95.6 (CH), 92.4 (CH), 85.3 (CH), 85.2 (CH), 31.1 (CH), 22.7 ( $\text{CH}_3$ ), 21.7 ( $\text{CH}_3$ ), 18.9 ( $\text{CH}_3$ ). **HRMS**  $[\text{M}+\text{Na}]^+$  calculated for  $\text{C}_{24}\text{H}_{22}\text{ClNNaO}_2\text{Ru}^+$  = 516.0275, found: 516.0281.

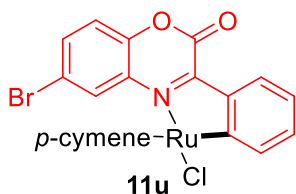

**11u**

Rufous solid, 19 % yield,  $^1\text{H NMR}$  (400 MHz,  $\text{CDCl}_3$ )  $\delta$  9.08 (s, 1H), 8.85 (d,  $J = 8.0$  Hz, 1H), 8.28 (d,  $J = 7.7$  Hz, 1H), 7.62 (d,  $J = 8.7$  Hz, 1H), 7.28 – 7.24 (m, 2H), 7.15 (t,  $J = 7.6$  Hz, 1H), 5.83 (d,  $J = 6.1$  Hz, 1H), 5.77 (d,  $J = 6.1$  Hz, 1H), 5.21 (d,  $J = 6.2$  Hz, 1H), 5.11 (d,  $J = 6.1$  Hz, 1H), 2.36 – 2.20 (m, 1H), 2.19 (s, 3H), 1.63 (s, 3H), 1.01 (d,  $J = 6.8$  Hz, 3H), 0.76 (d,  $J = 6.8$  Hz, 3H).  $^{13}\text{C NMR}$  (101 MHz,  $\text{CDCl}_3$ )  $\delta$  197.0 ( $\text{C}_q$ ), 158.7 ( $\text{C}_q$ ), 149.6 ( $\text{C}_q$ ), 143.2 ( $\text{C}_q$ ), 142.5 ( $\text{C}_q$ ), 139.5 (CH), 134.7 ( $\text{C}_q$ ), 134.1 (CH), 133.0 (CH), 131.4 (CH), 131.3 (CH), 123.6 (CH), 117.9 (CH), 117.6 ( $\text{C}_q$ ), 105.3 ( $\text{C}_q$ ), 104.7 ( $\text{C}_q$ ), 97.1 (CH), 92.6 (CH), 85.1 (CH), 82.2 (CH), 31.2 (CH), 23.3 ( $\text{CH}_3$ ), 21.1 ( $\text{CH}_3$ ), 18.9 ( $\text{CH}_3$ ). **HRMS**  $[\text{M}+\text{K}]^+$  calculated for  $\text{C}_{24}\text{H}_{21}\text{BrClKNO}_4\text{Ru}^+$  = 609.9119, found: 609.9178.

## 5. References

- Zhang, Y.; Huang, T.; Li, X.; Zhang, M.; Song, Y.; Huang, K.; Su, W. *RSC Adv.* **2020**, *10*, 22216-22221.
- Moriarty, R. M.; Prakash, O. *Org. React.* **2001**, *57*, 327-415.
- Schischko, A.; Kaplaneris, N.; Rogge, T.; Sirvinskaite, G.; Son, J.; Ackermann, L. *Nat Commun.* **2019**, *10*, 3553-3561.

4. Saitz, C.; Rodríguez, H.; Márquez, A.; Canete, A.; Jullian, C.; Zanocco, A. Rodriguez, H. *Synth. Commun.* **2001**, *31*, 135-140.
5. Peng, H.; Li, T.; Tian, D.; Yang, H.; Xu, G.; Tang W. *Org. Biomol. Chem.* **2021**, *19*, 4327-4337.

## 6. NMR Spectra

### $^1\text{H}$ and $^{13}\text{C}$ NMR Spectra of compound **3aa**

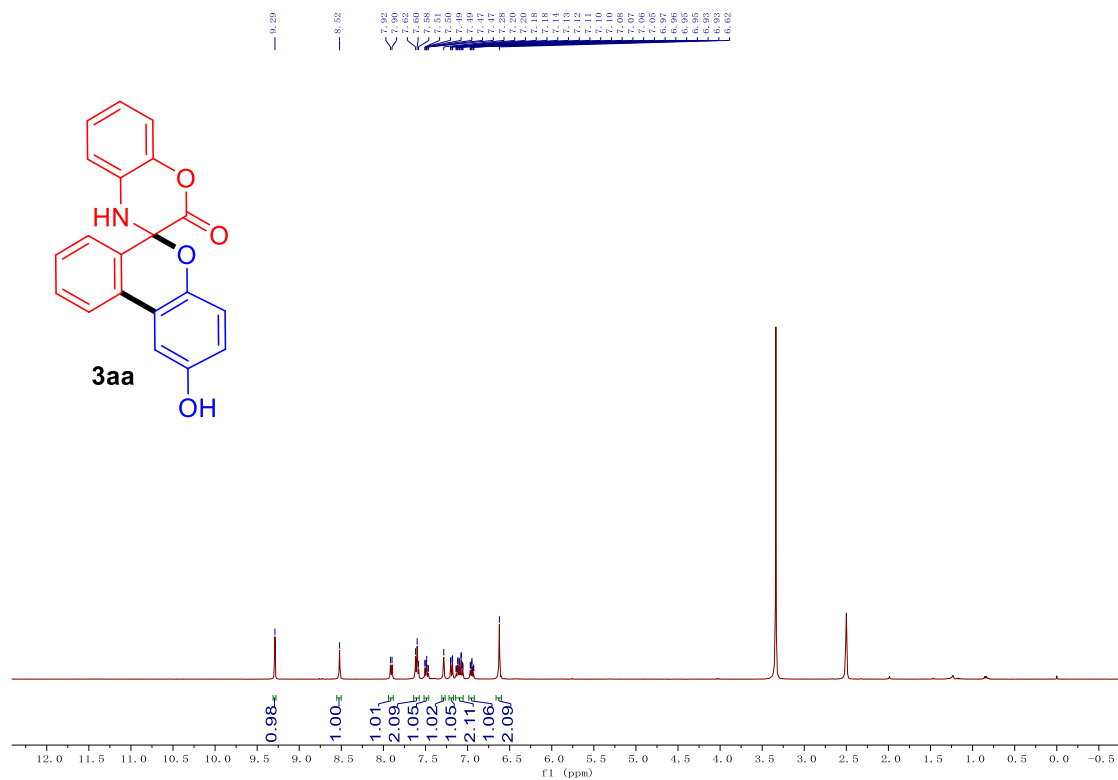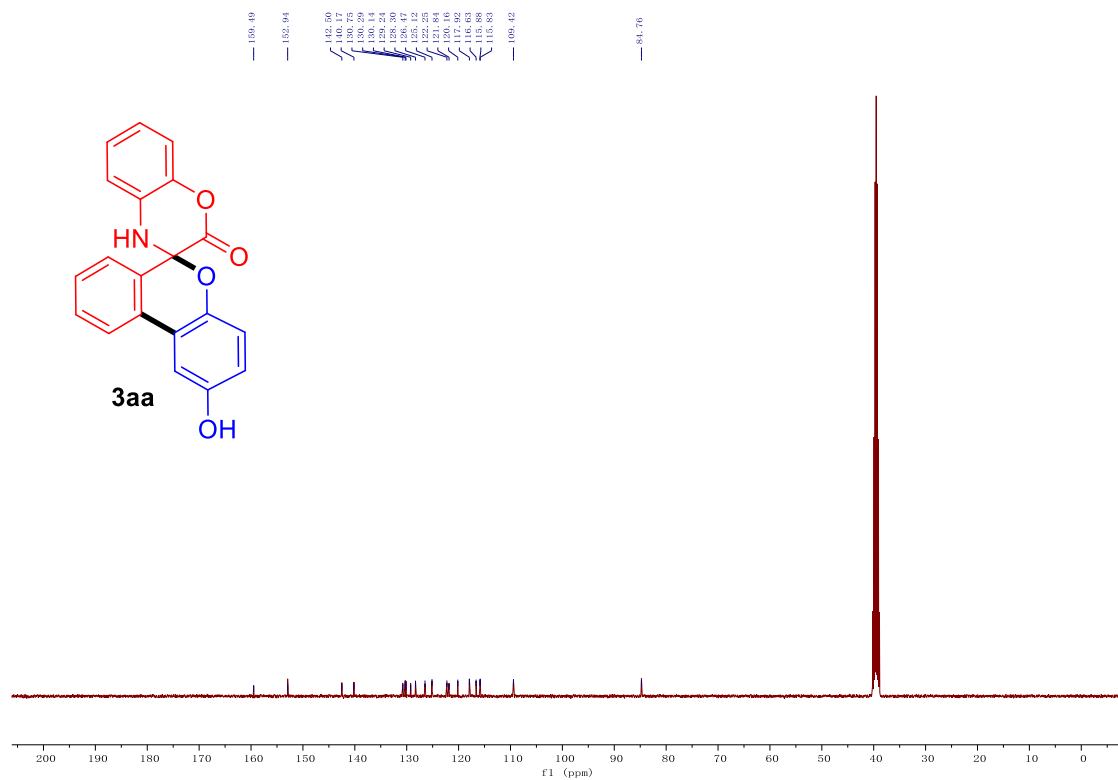

<sup>1</sup>H and <sup>13</sup>C NMR Spectra of compound **3ba**

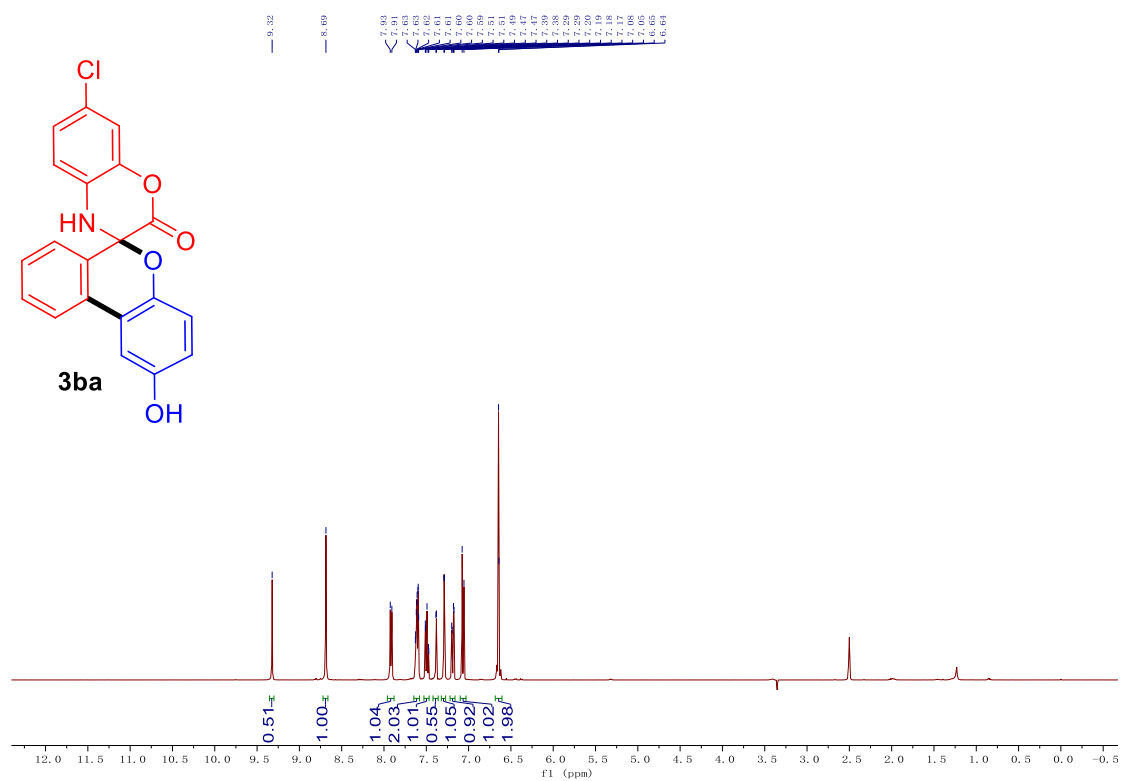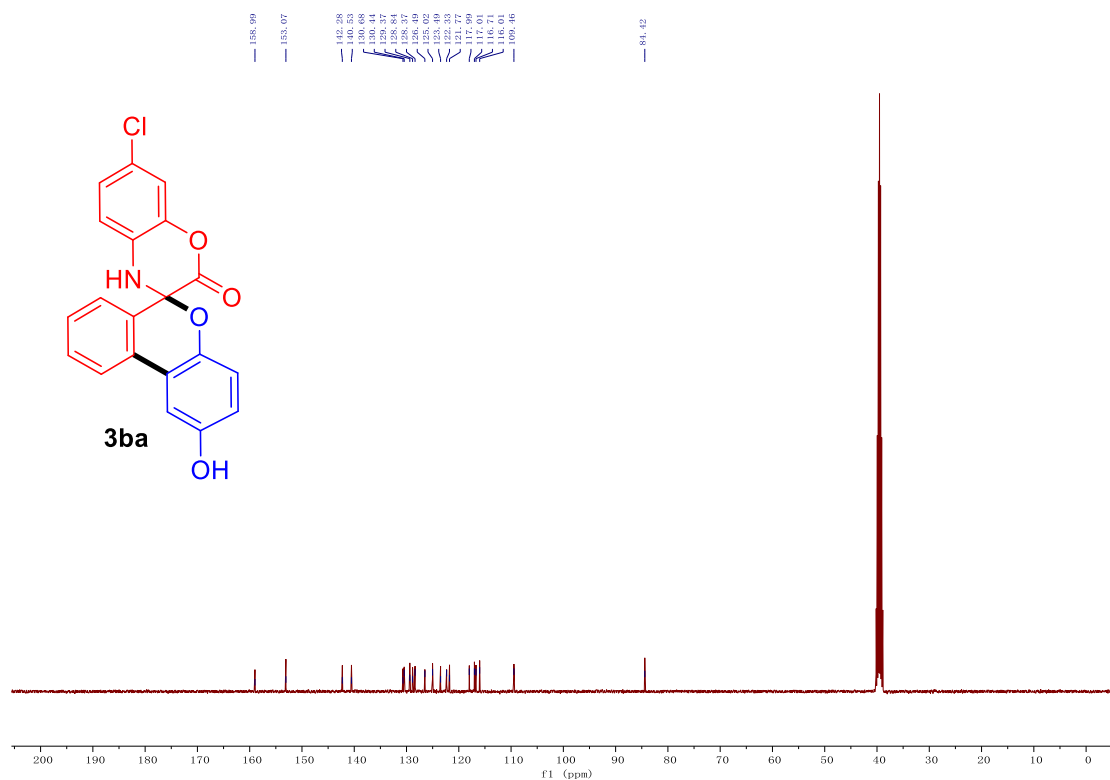



<sup>1</sup>H and <sup>13</sup>C NMR Spectra of compound **3ca**

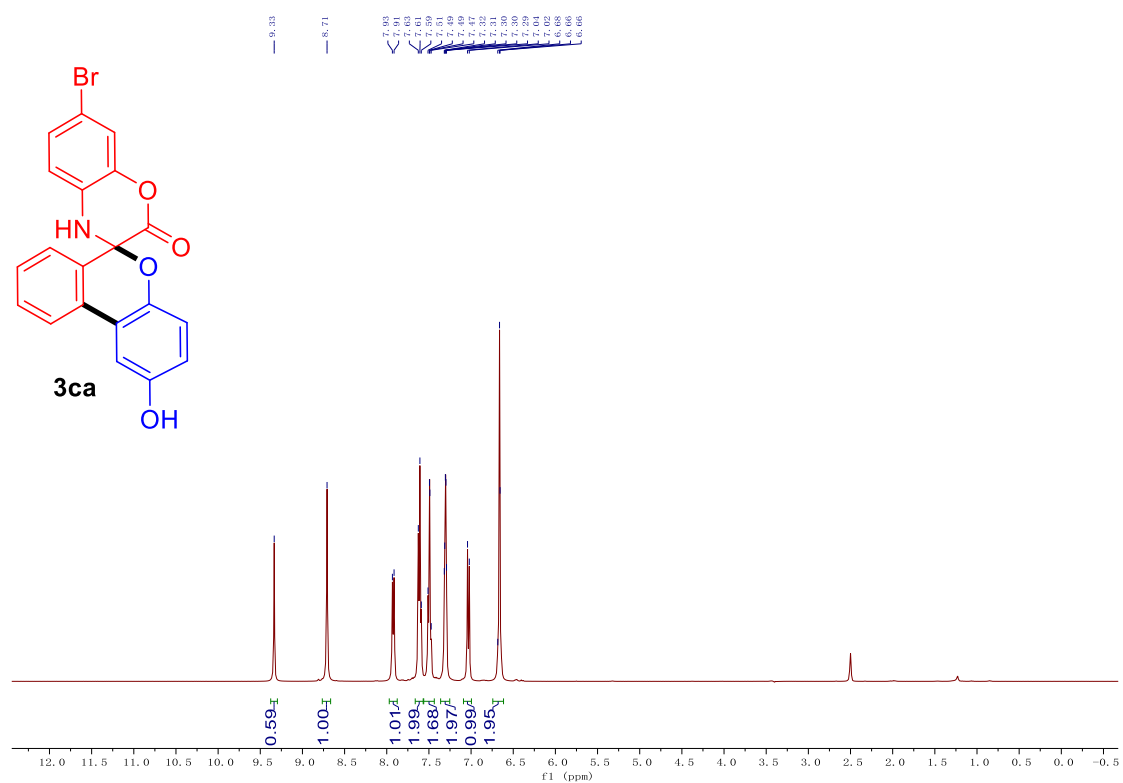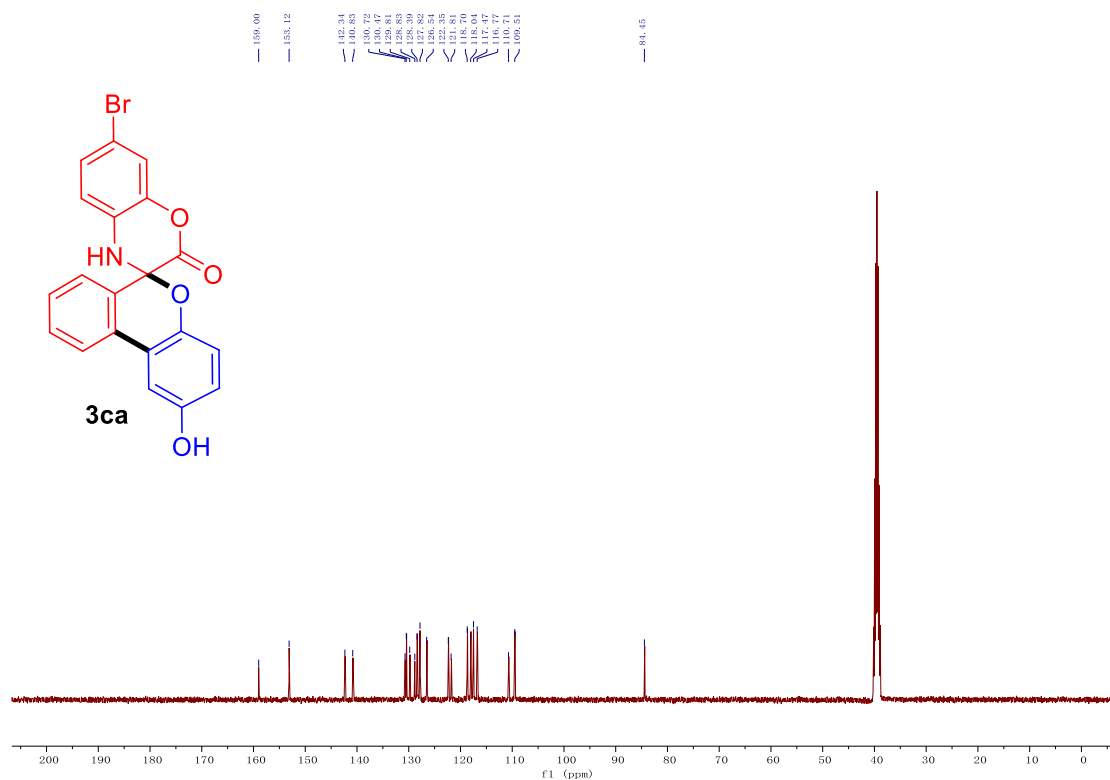

$^1\text{H}$  and  $^{13}\text{C}$  NMR Spectra of compound **3da**

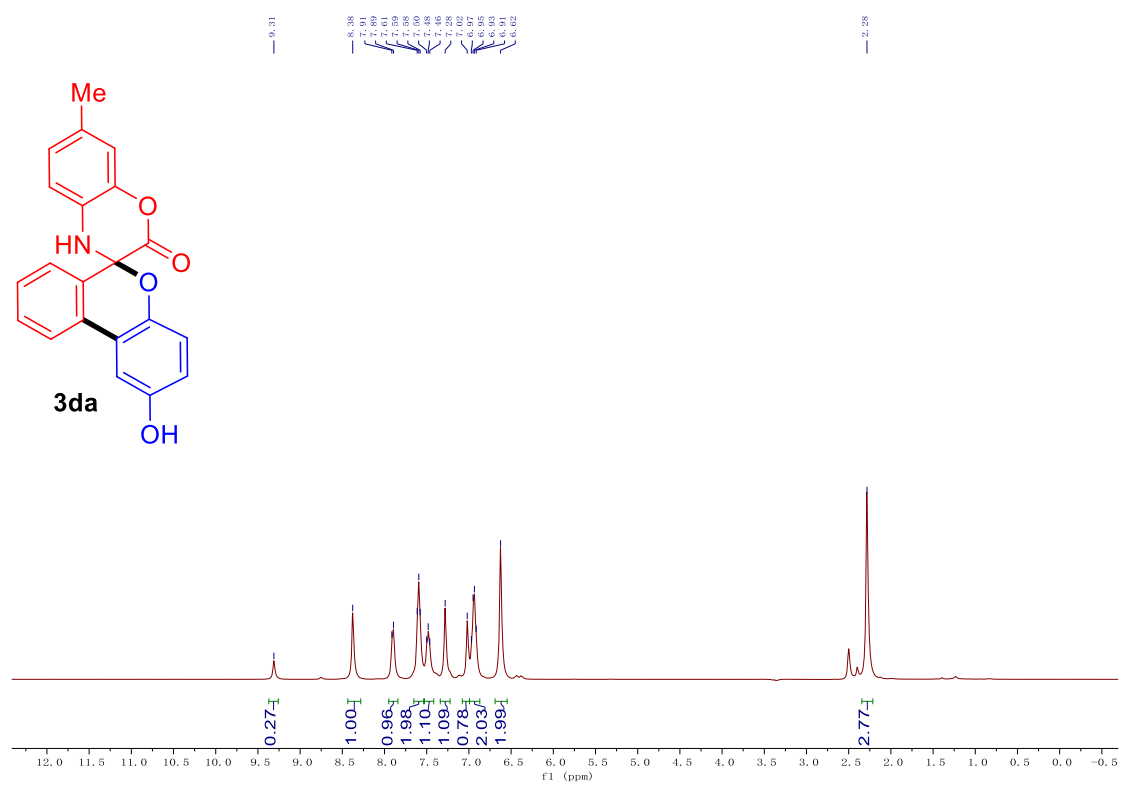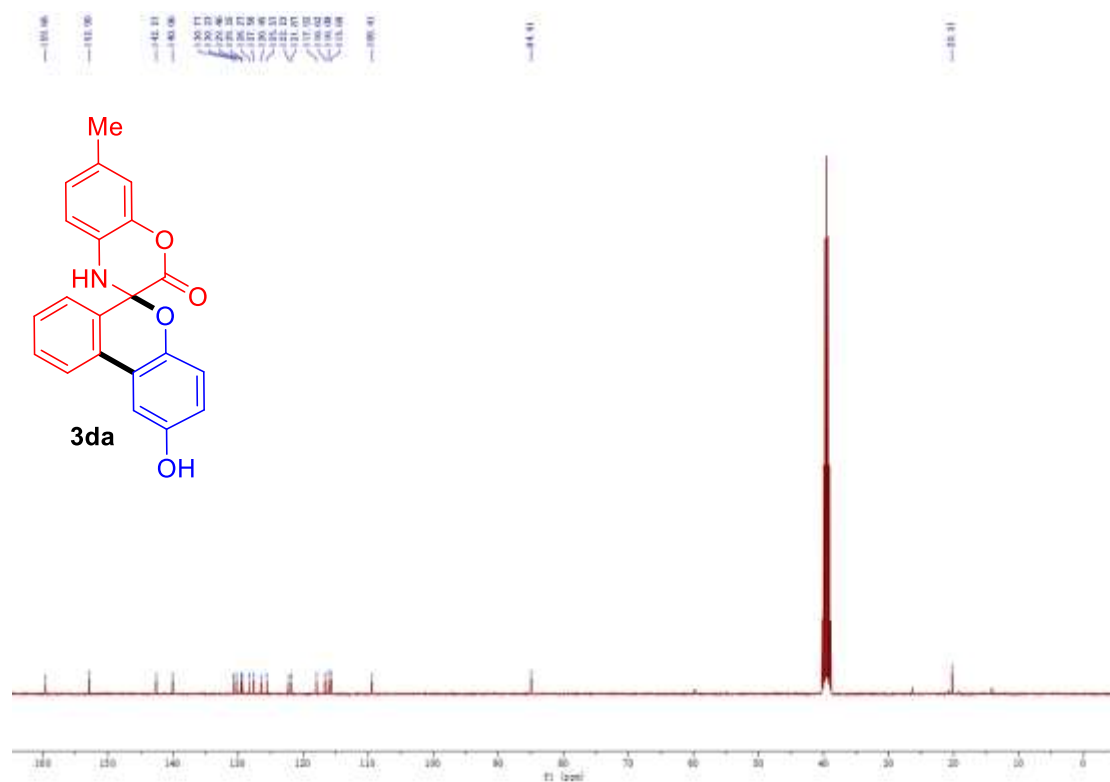

<sup>1</sup>H and <sup>13</sup>C NMR Spectra of compound **3ea**

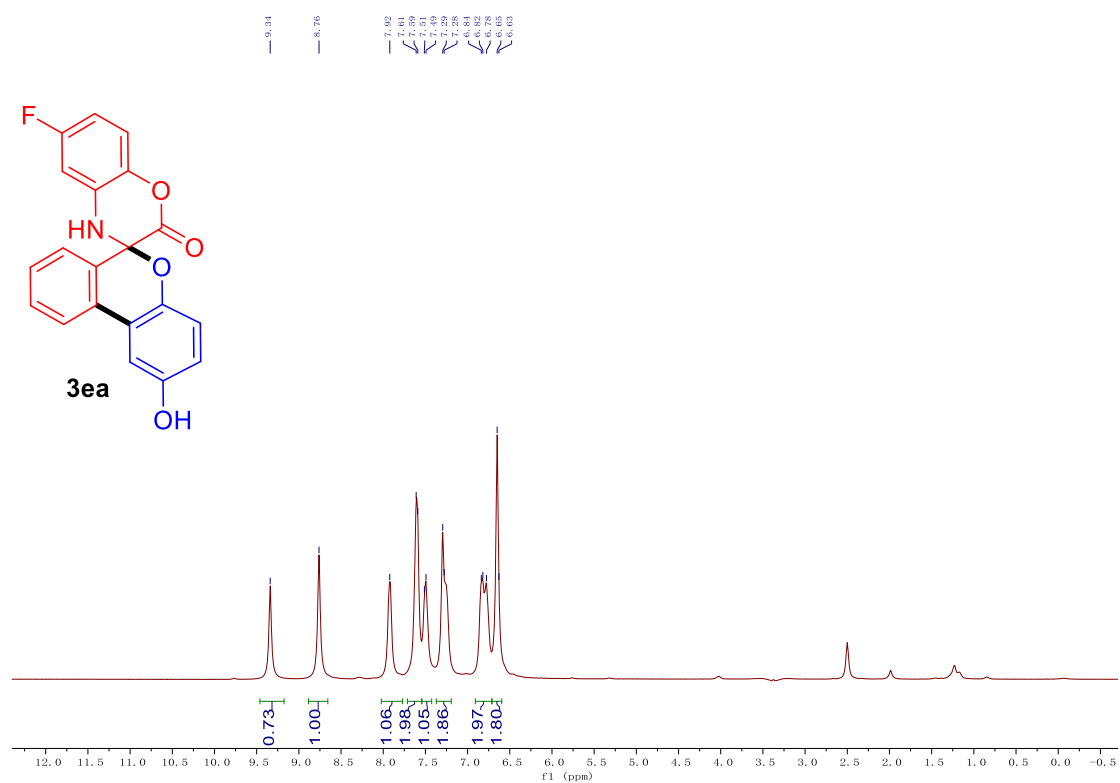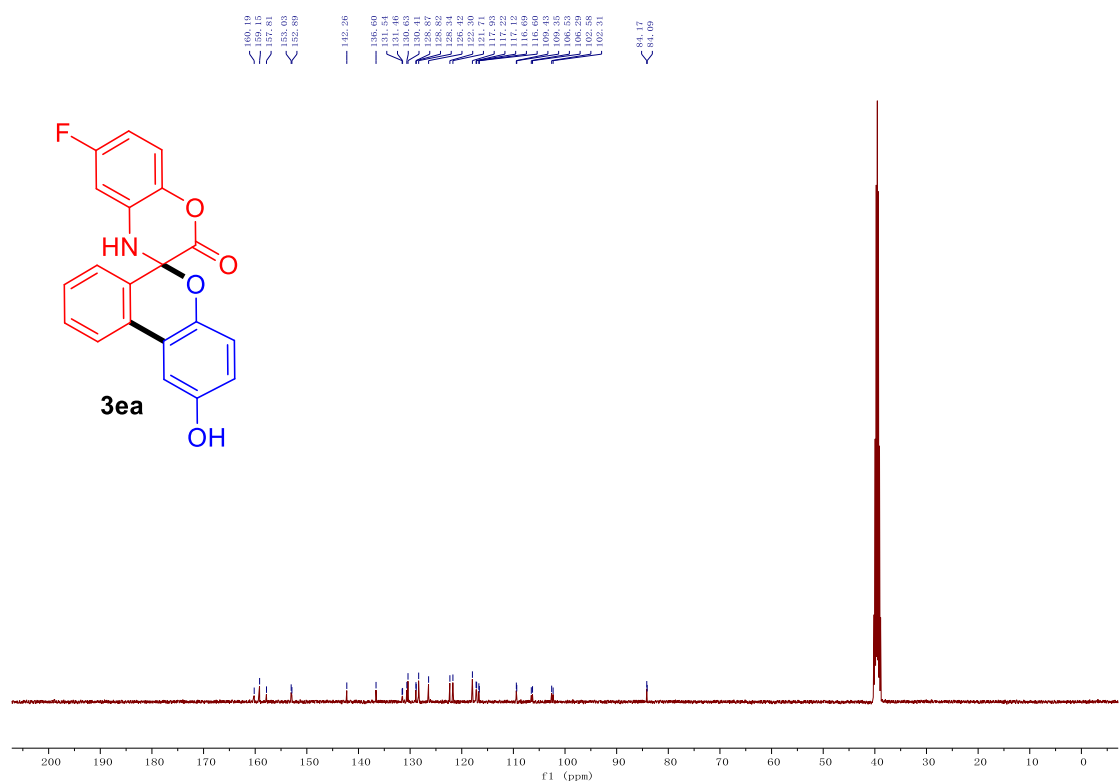

# <sup>1</sup>H and <sup>13</sup>C NMR Spectra of compound **3fa**

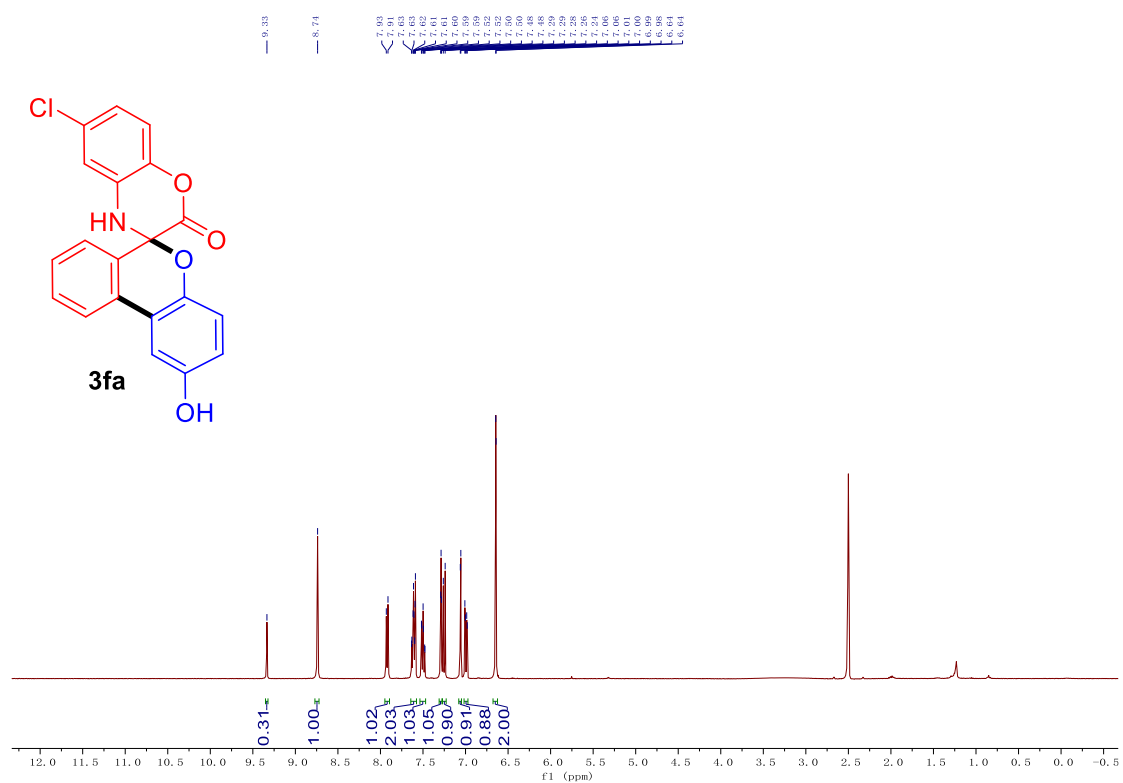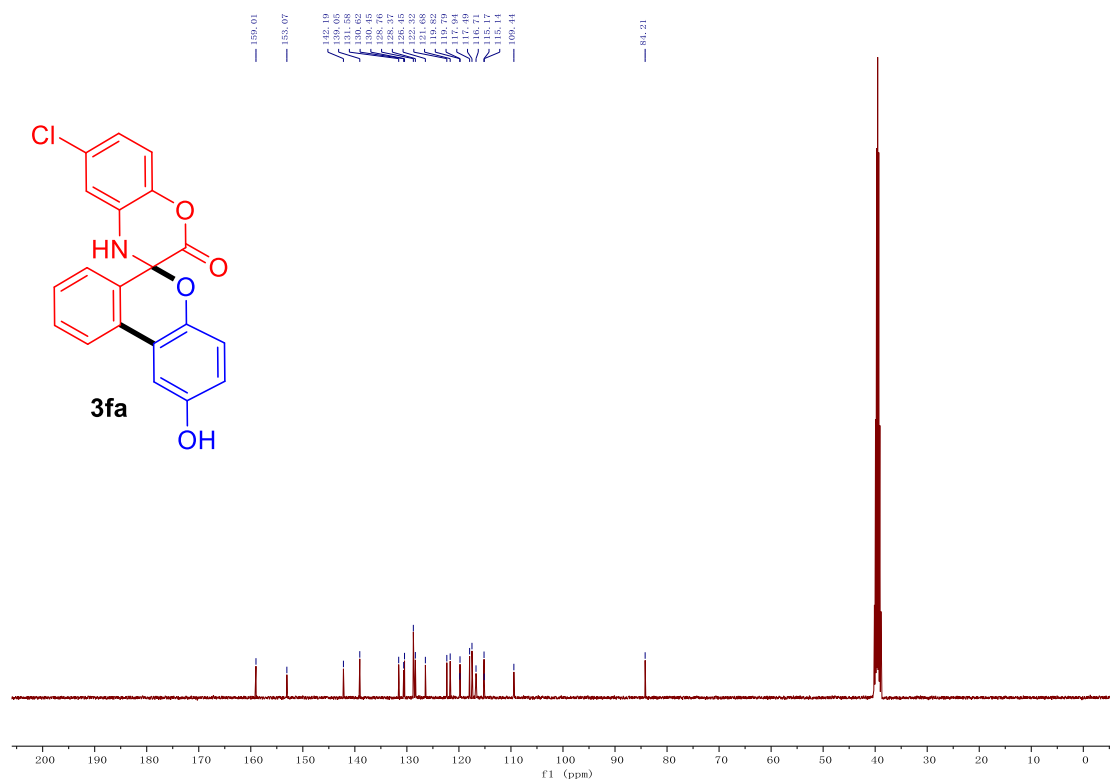

# <sup>1</sup>H and <sup>13</sup>C NMR Spectra of compound **3ga**

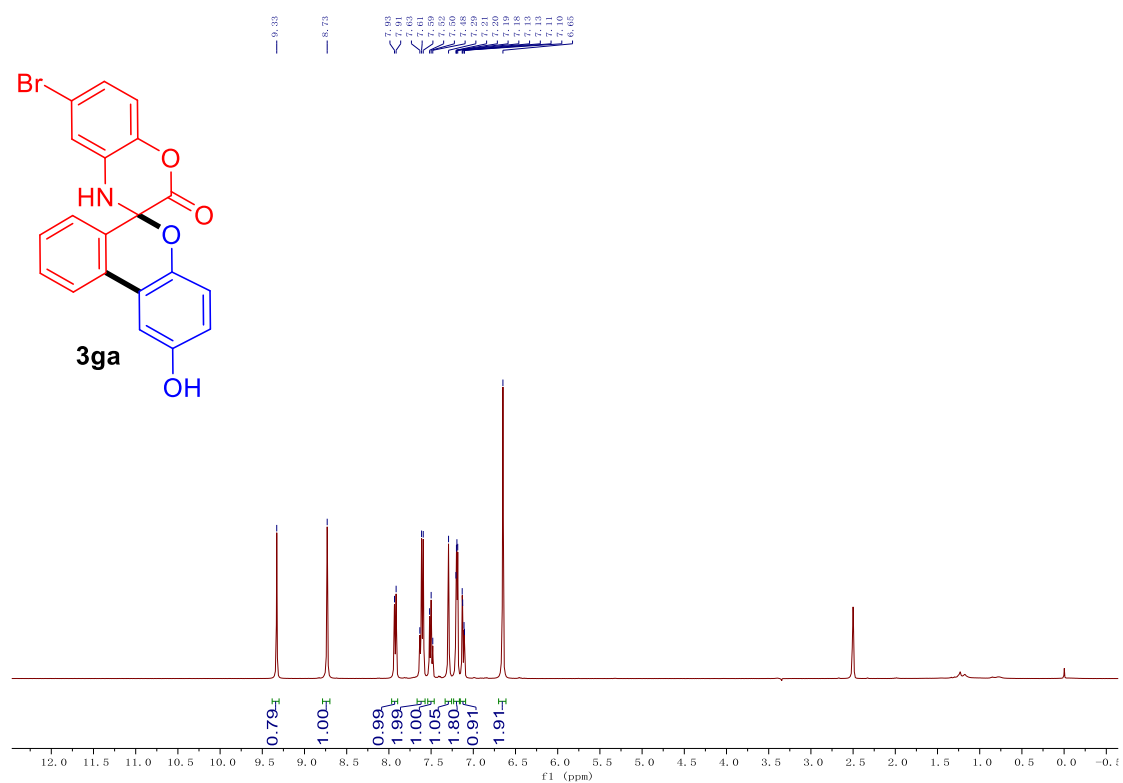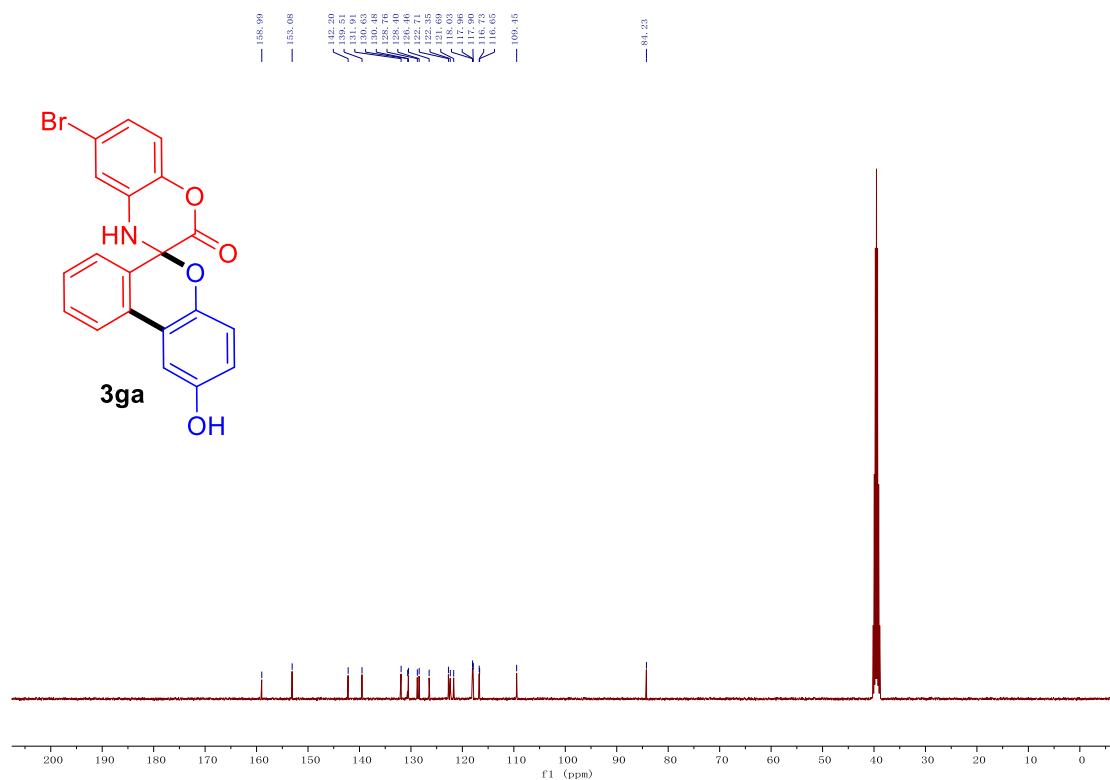

<sup>1</sup>H and <sup>13</sup>C NMR Spectra of compound **3ha**

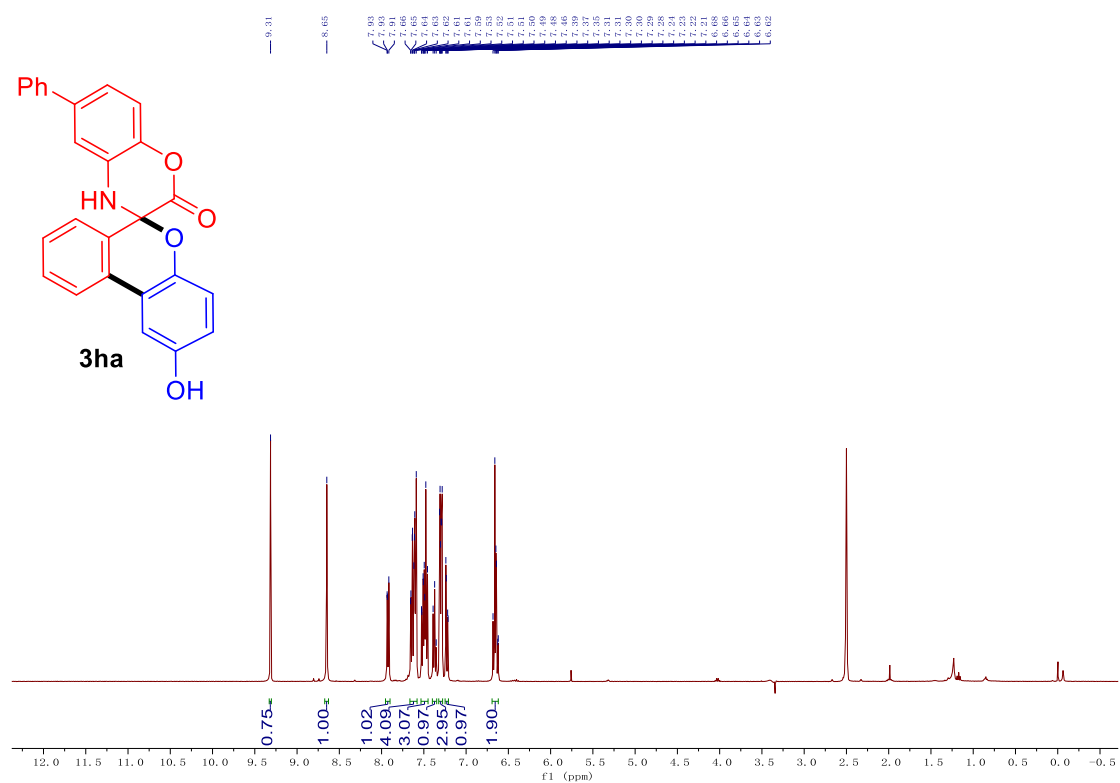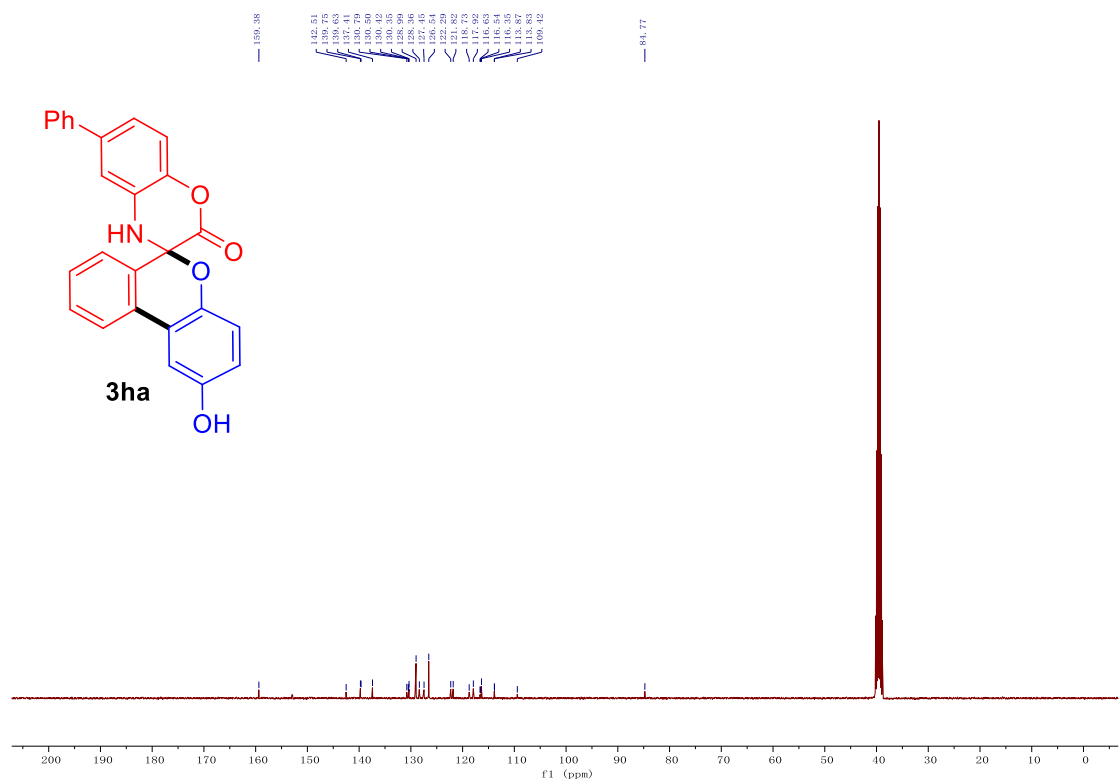

<sup>1</sup>H and <sup>13</sup>C NMR Spectra of compound **3ia**

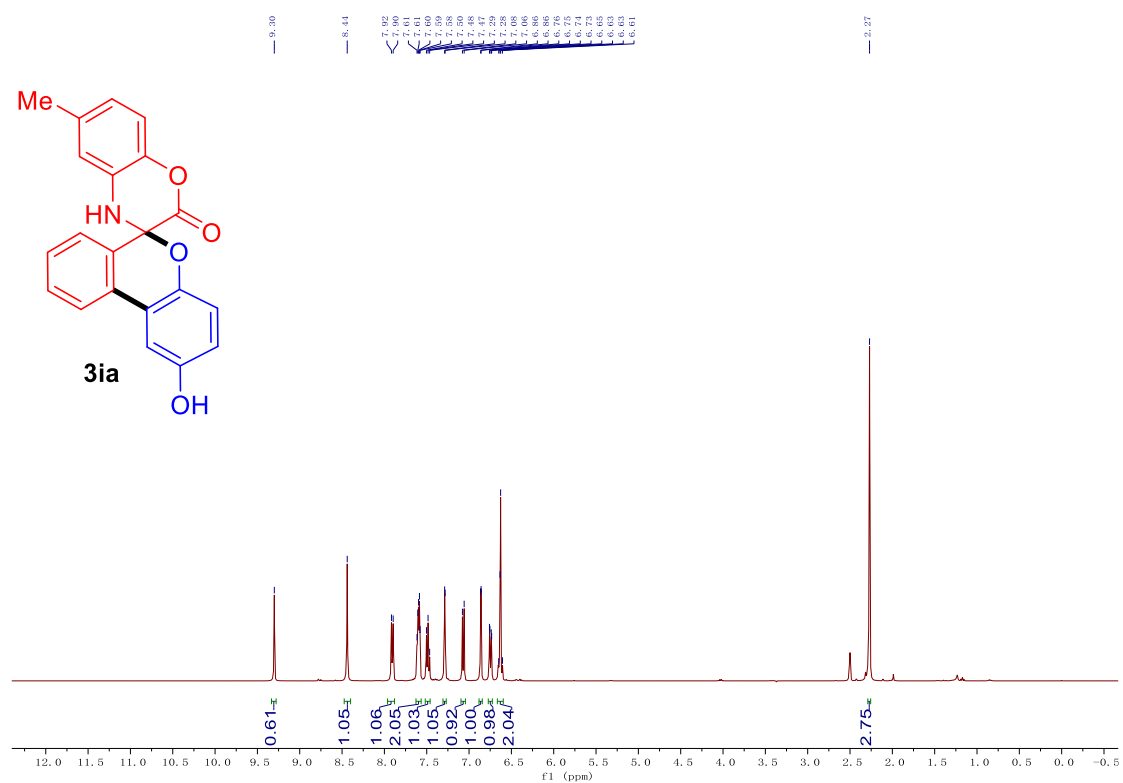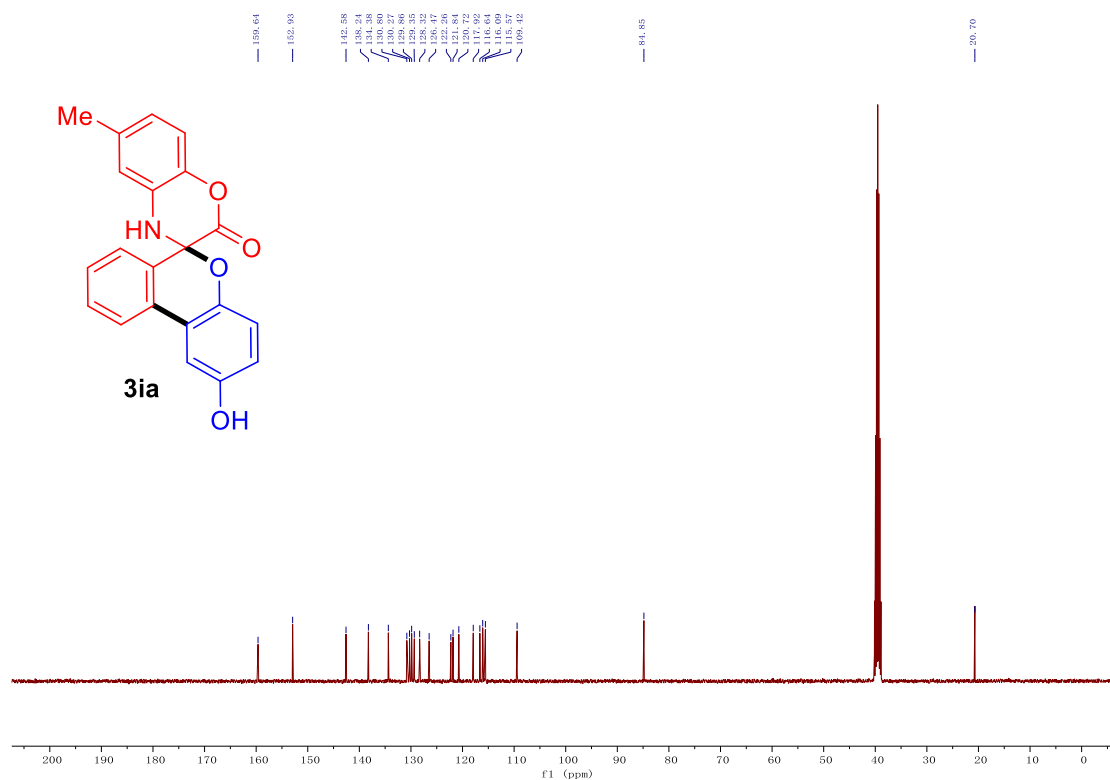

<sup>1</sup>H and <sup>13</sup>C NMR Spectra of compound **3ja**

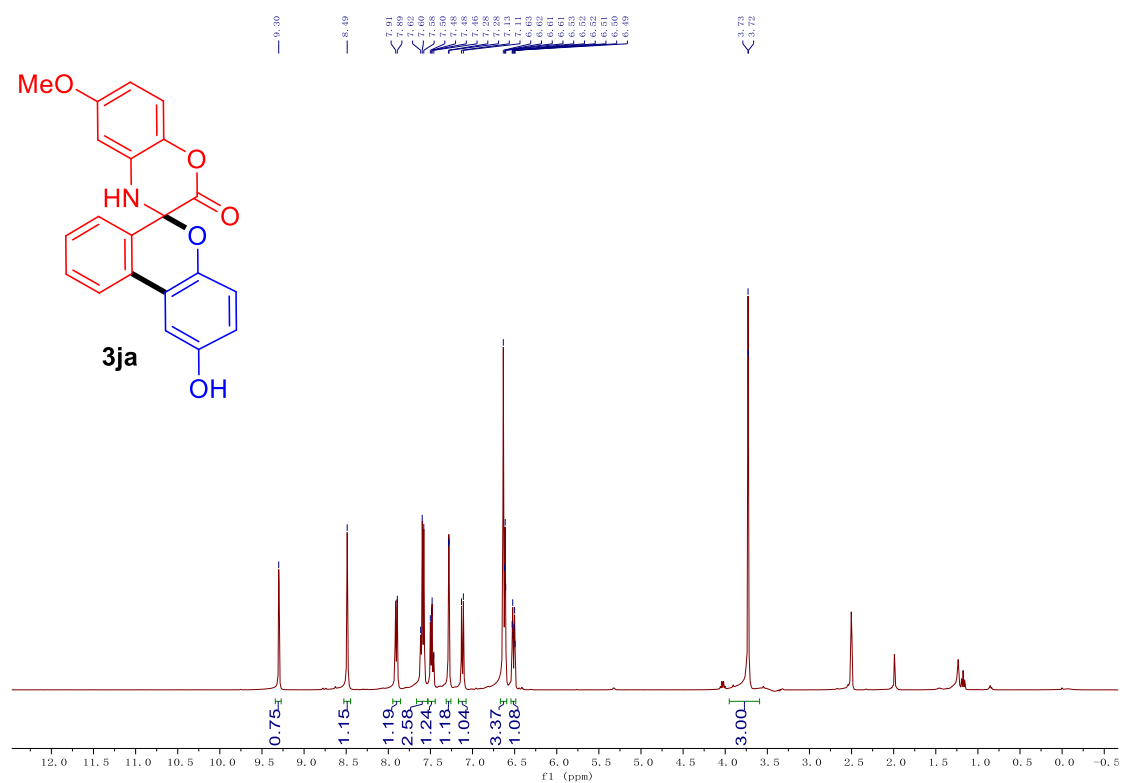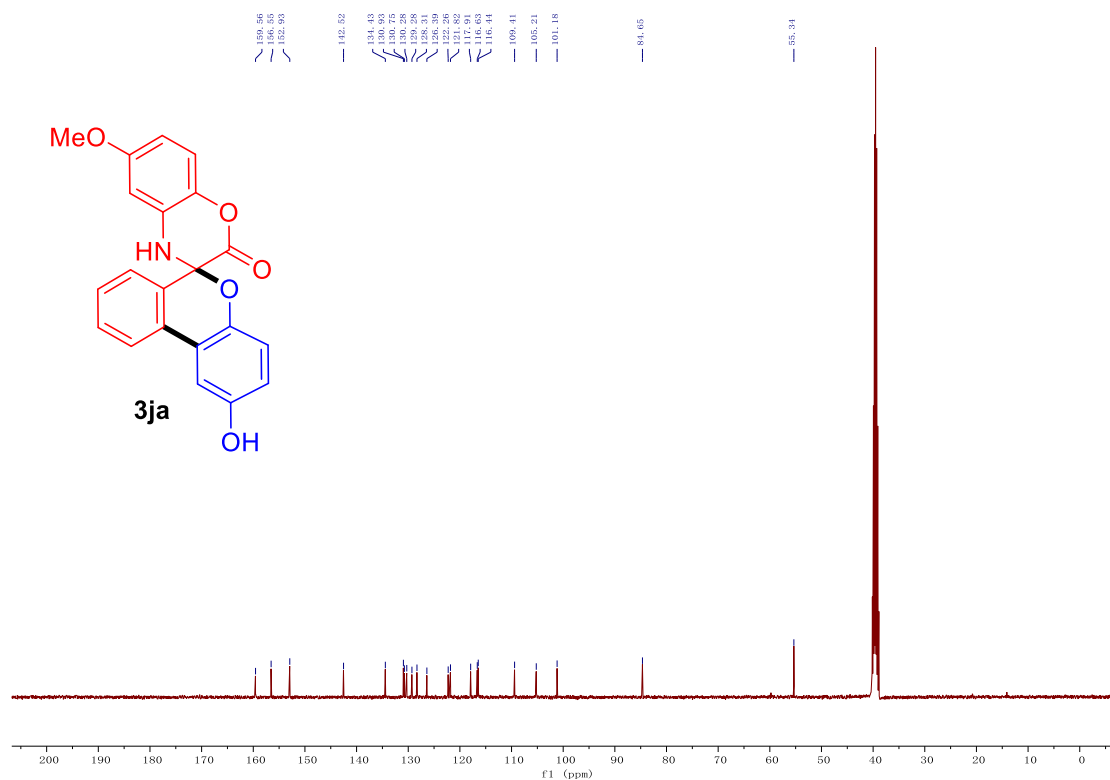





<sup>1</sup>H and <sup>13</sup>C NMR Spectra of compound **3la**

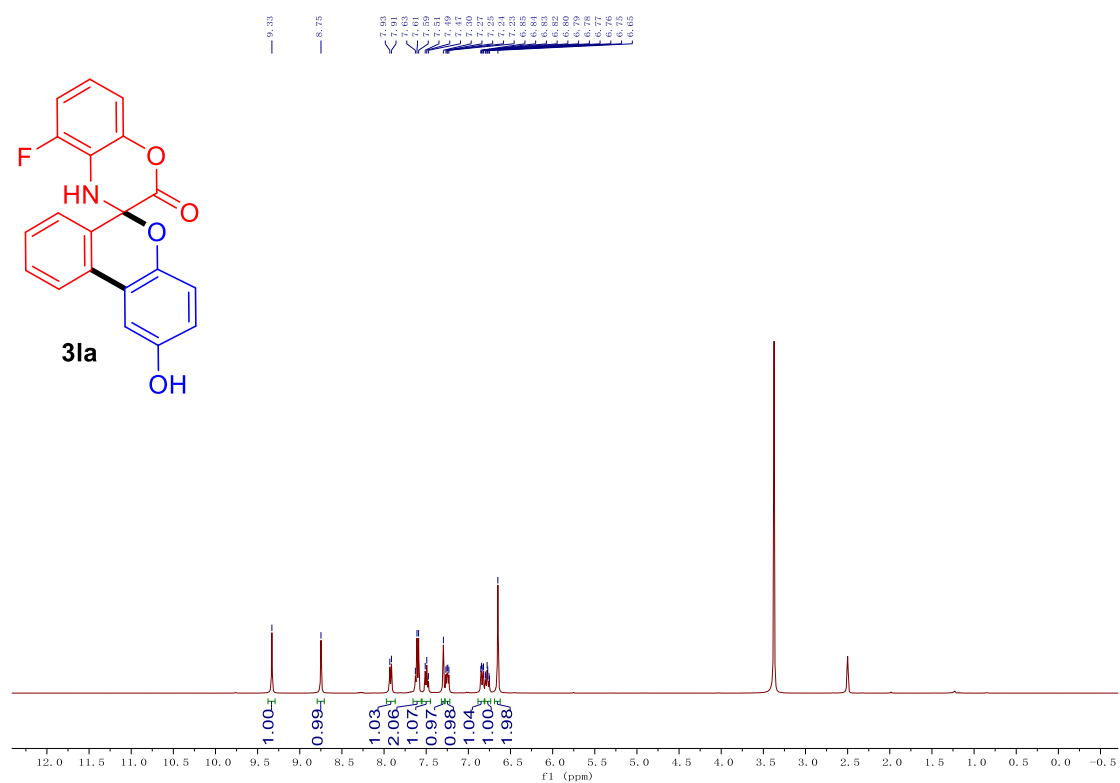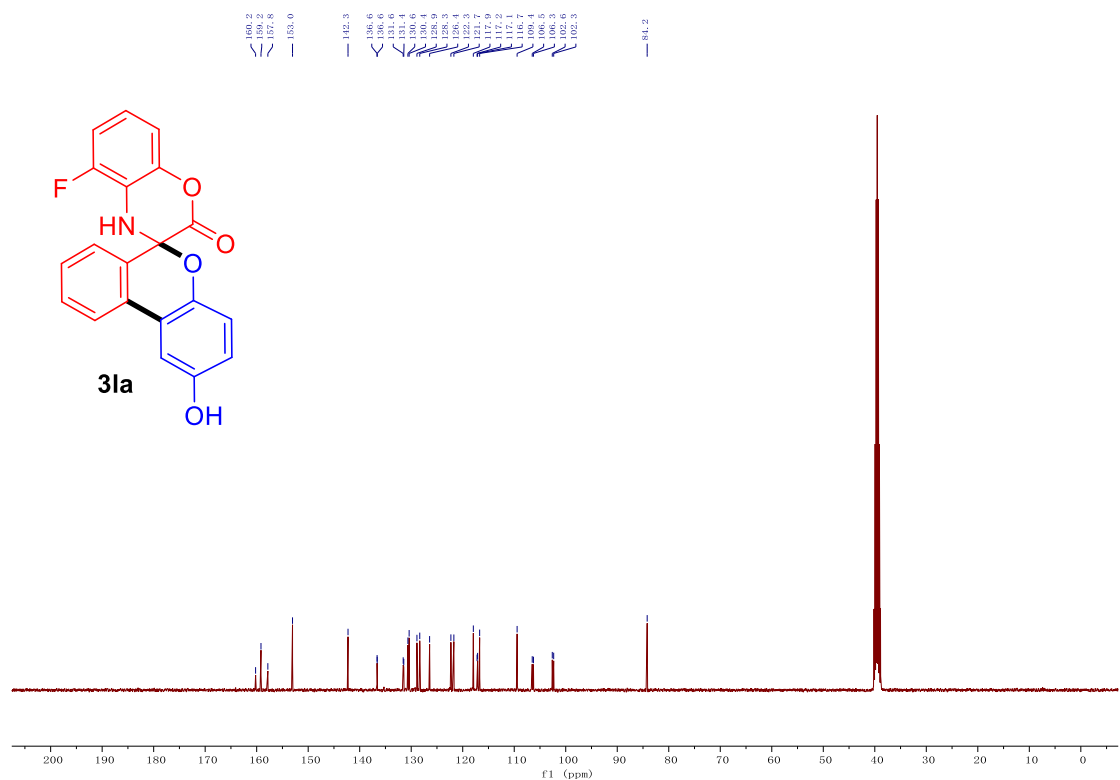

<sup>1</sup>H and <sup>13</sup>C NMR Spectra of compound **3ma**

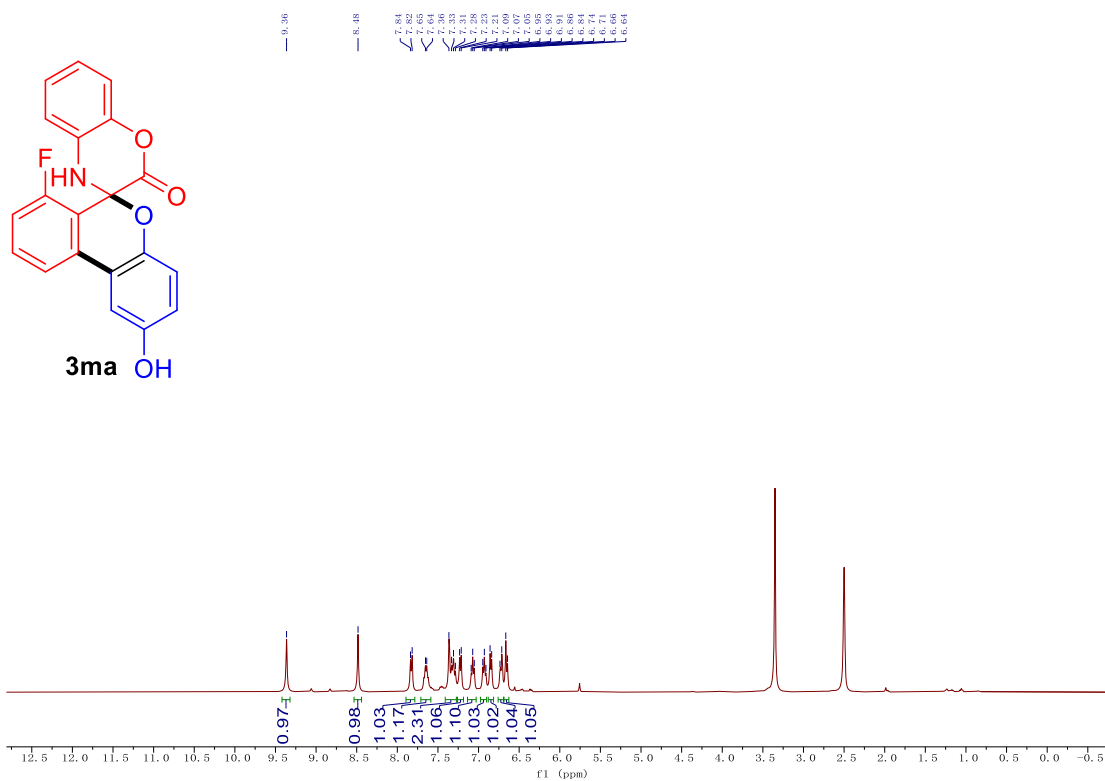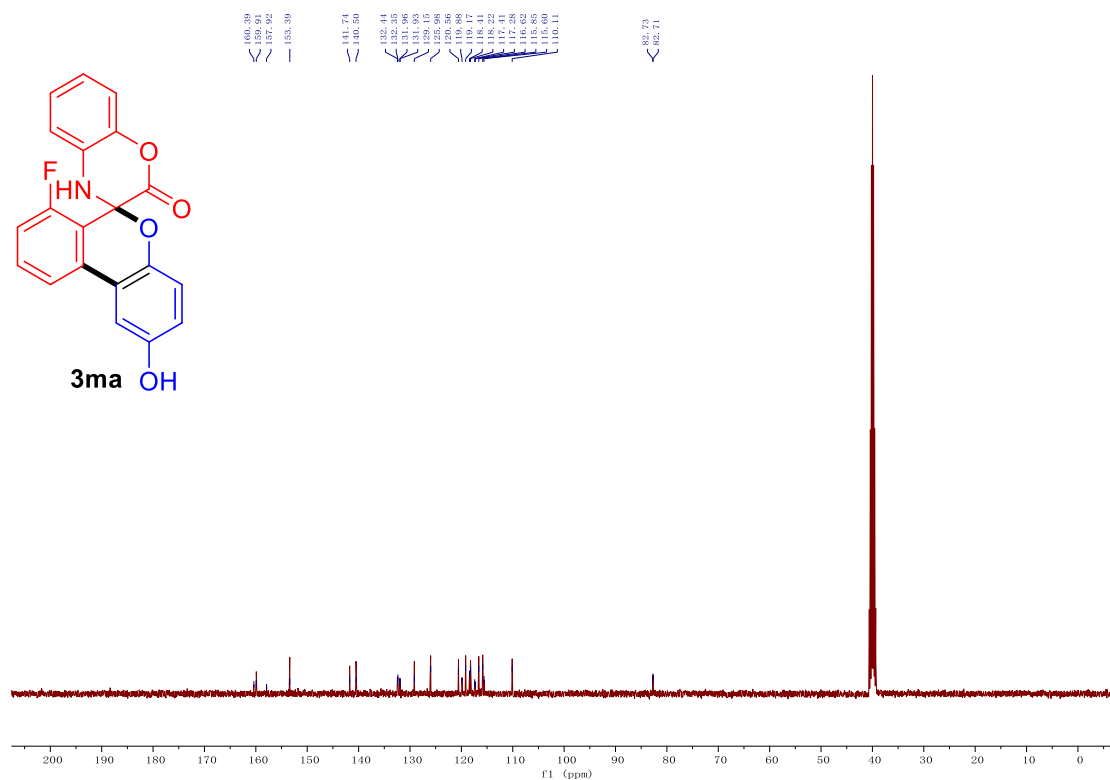

<sup>1</sup>H and <sup>13</sup>C NMR Spectra of compound **3na**

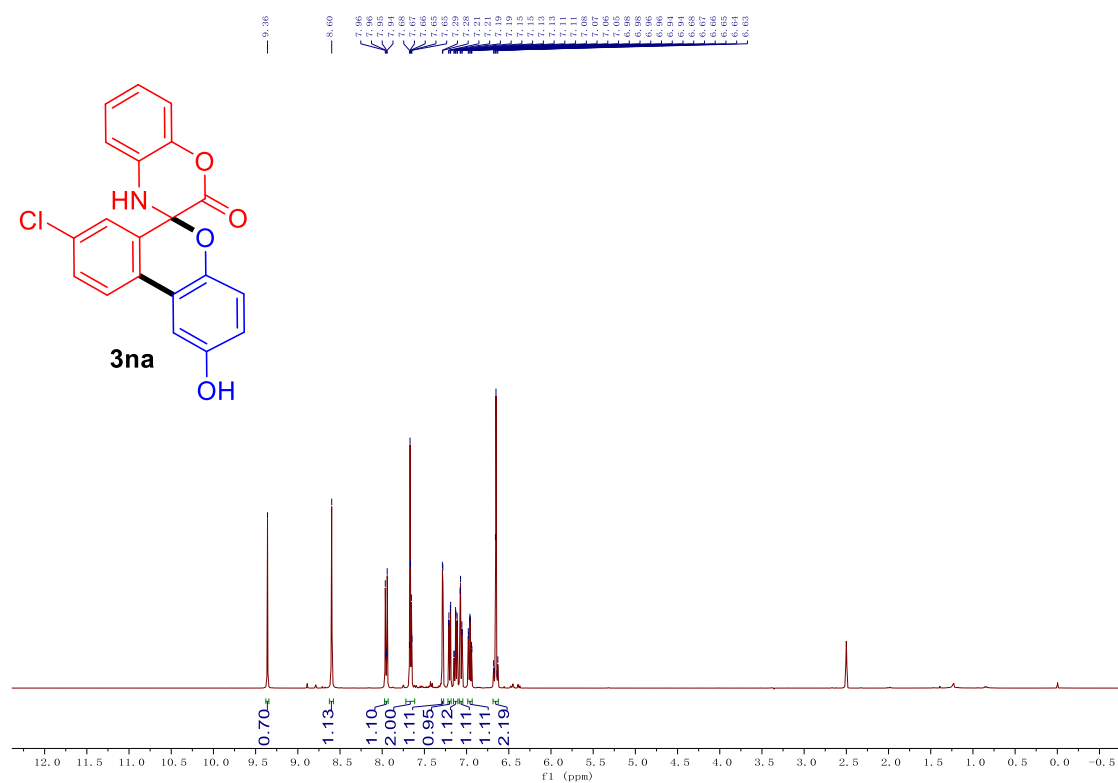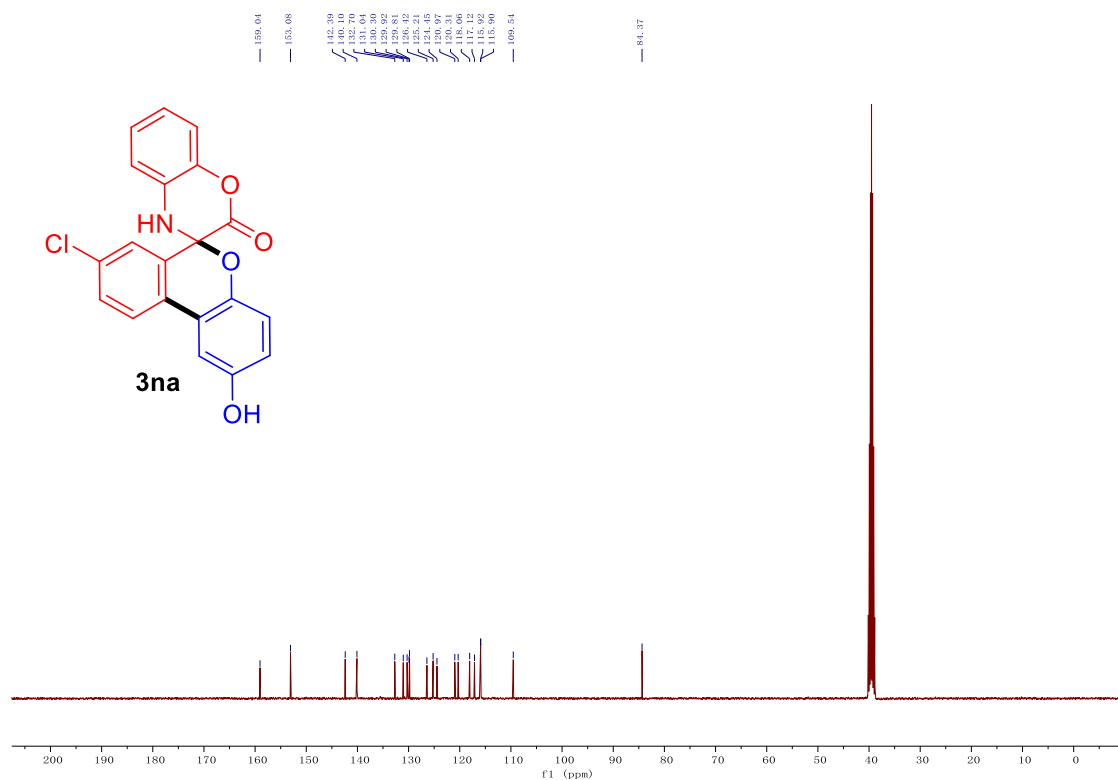

<sup>1</sup>H and <sup>13</sup>C NMR Spectra of compound **3oa**

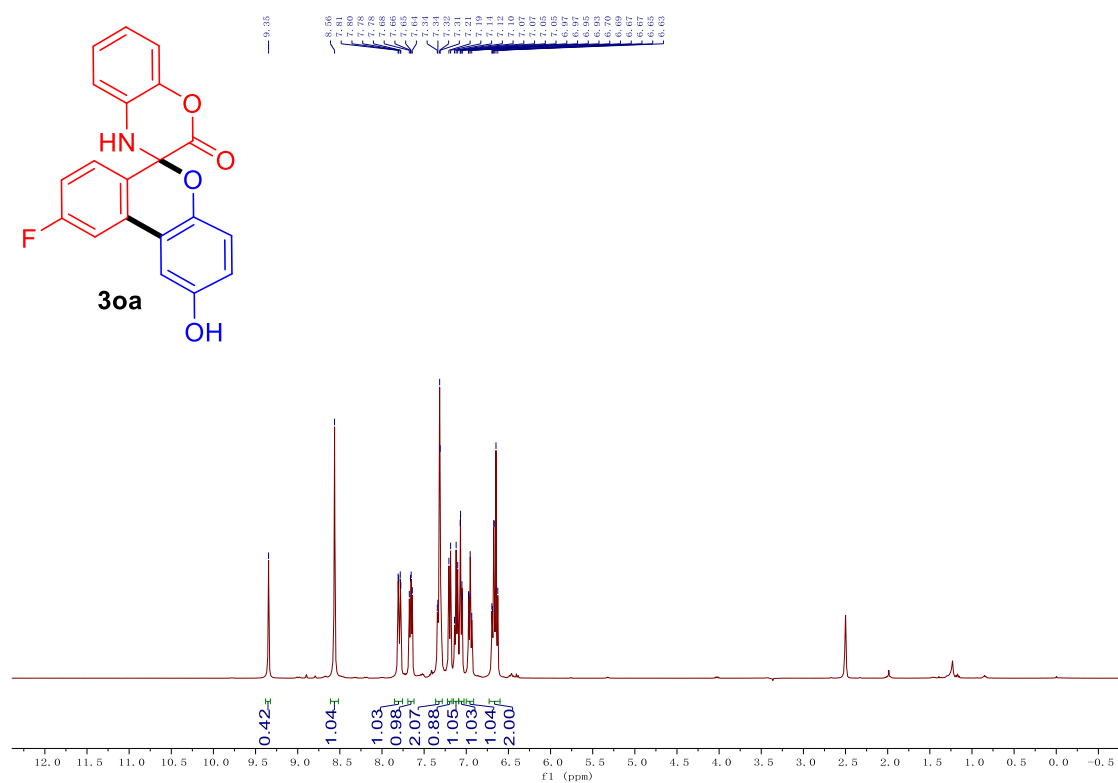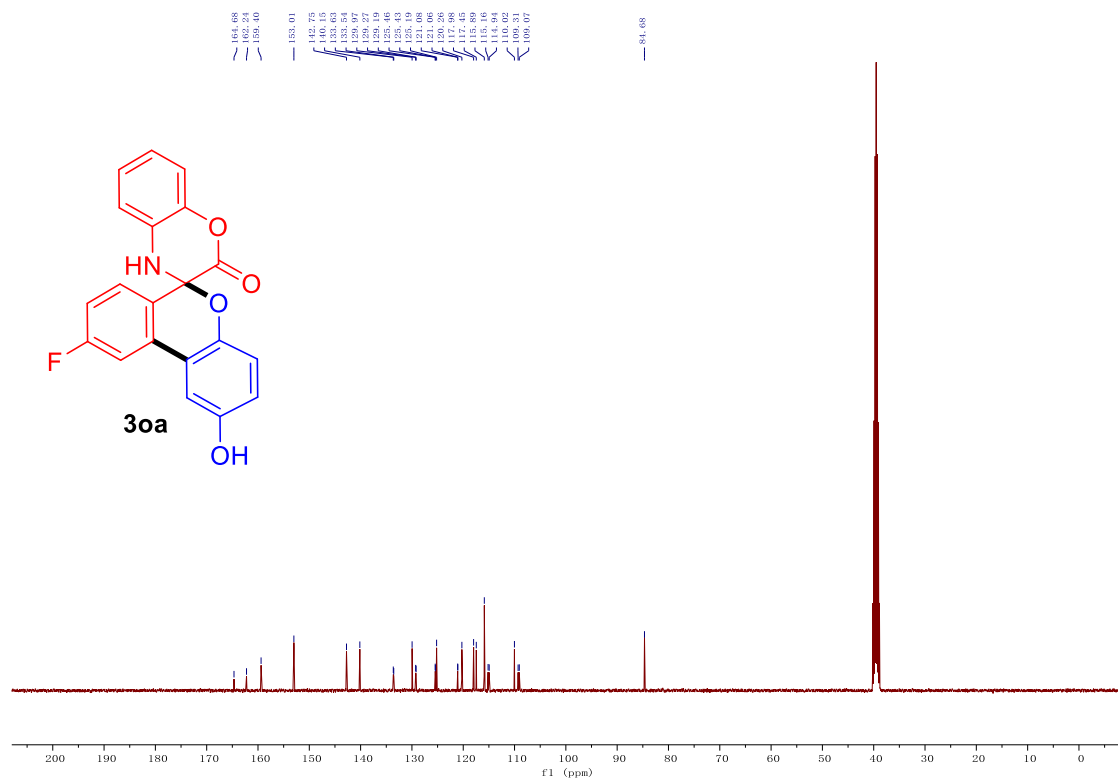

<sup>1</sup>H and <sup>13</sup>C NMR Spectra of compound **3pa**

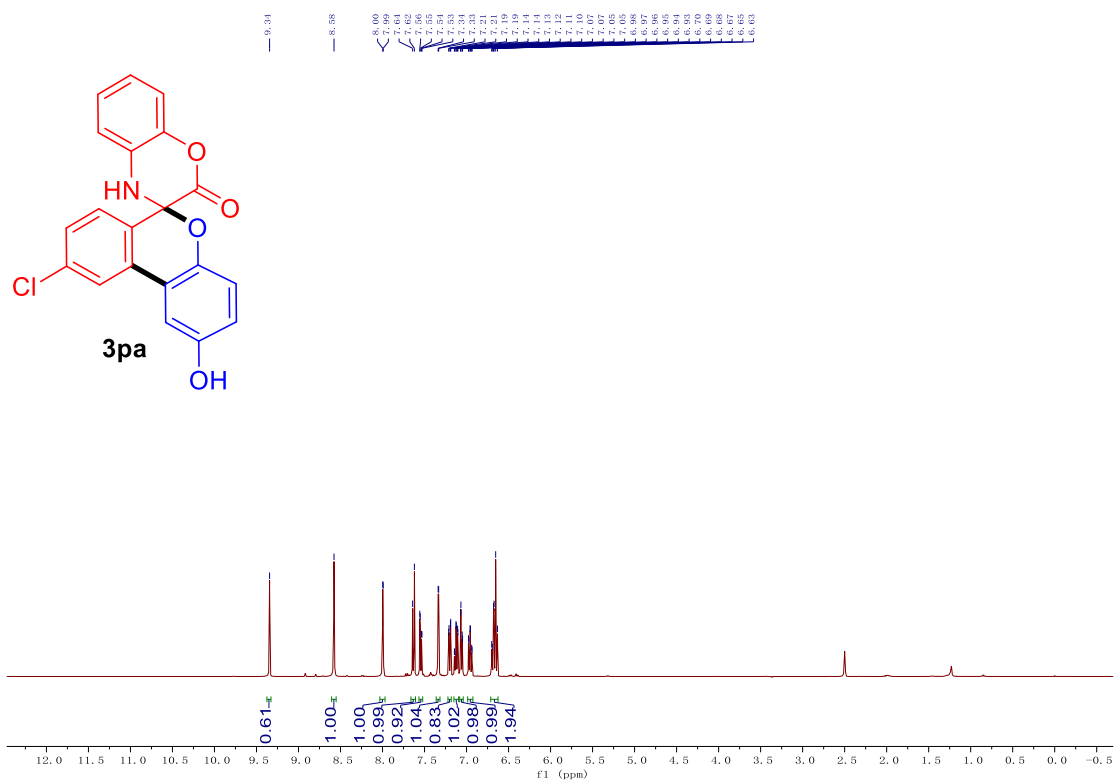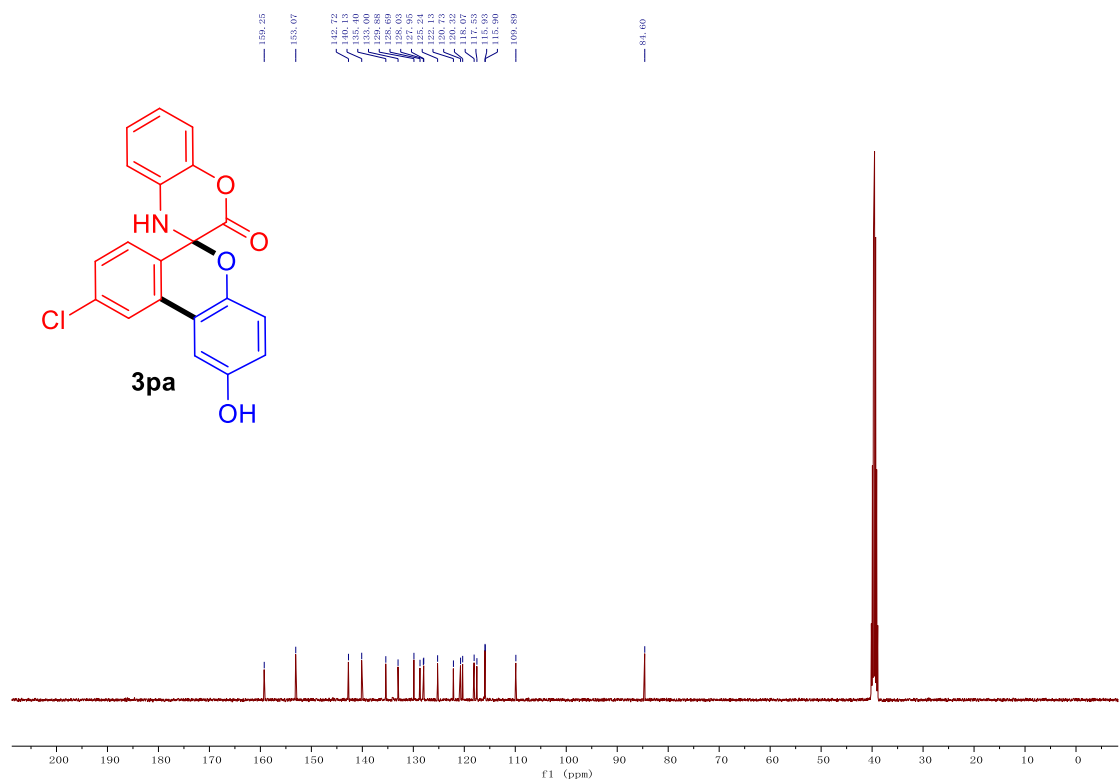

<sup>1</sup>H and <sup>13</sup>C NMR Spectra of compound **3qa**

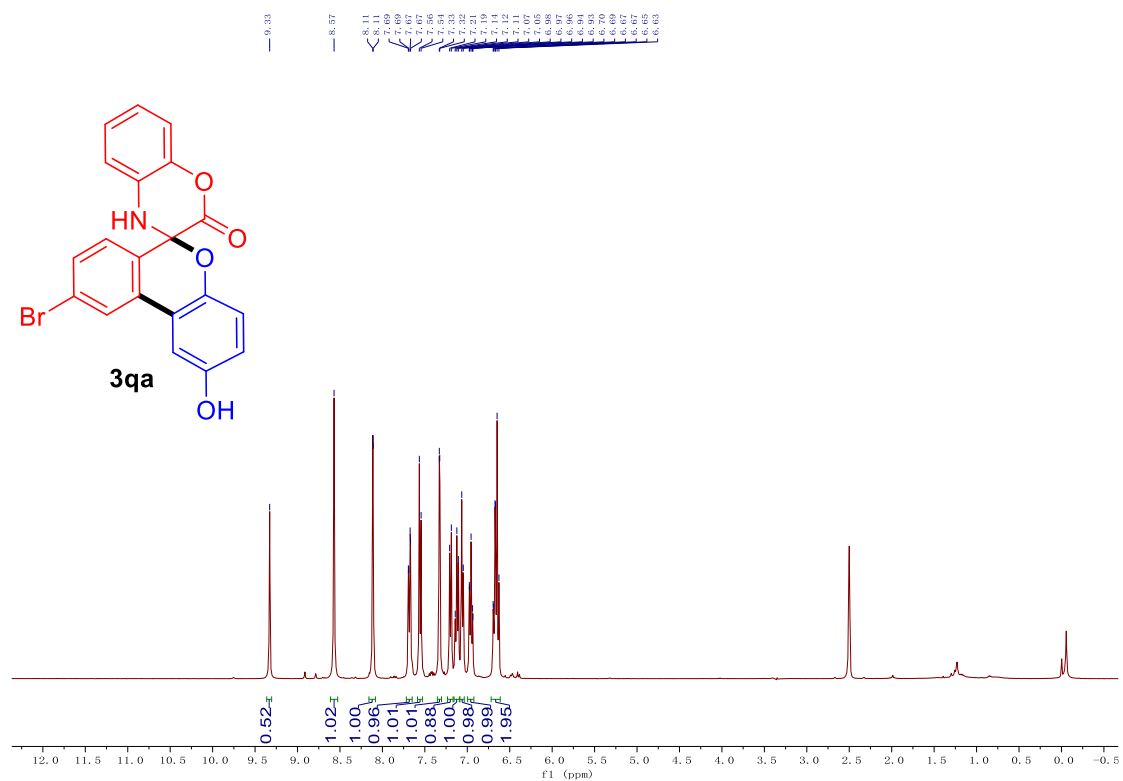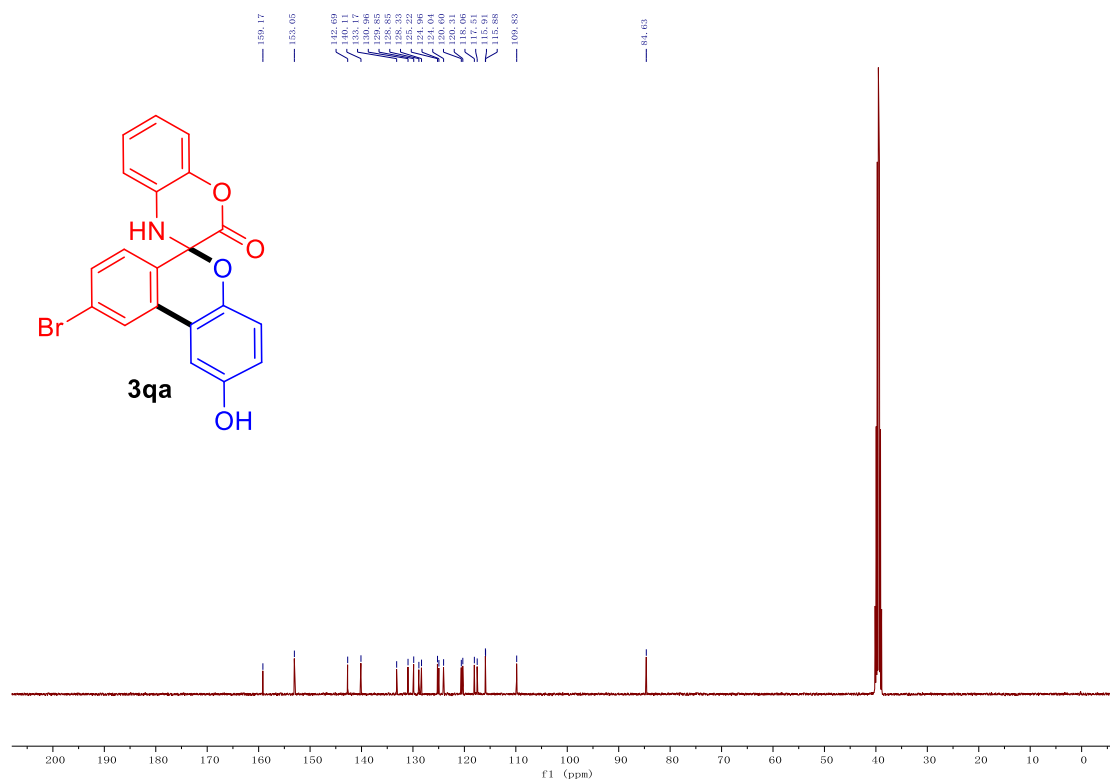

<sup>1</sup>H and <sup>13</sup>C NMR Spectra of compound **3ra**

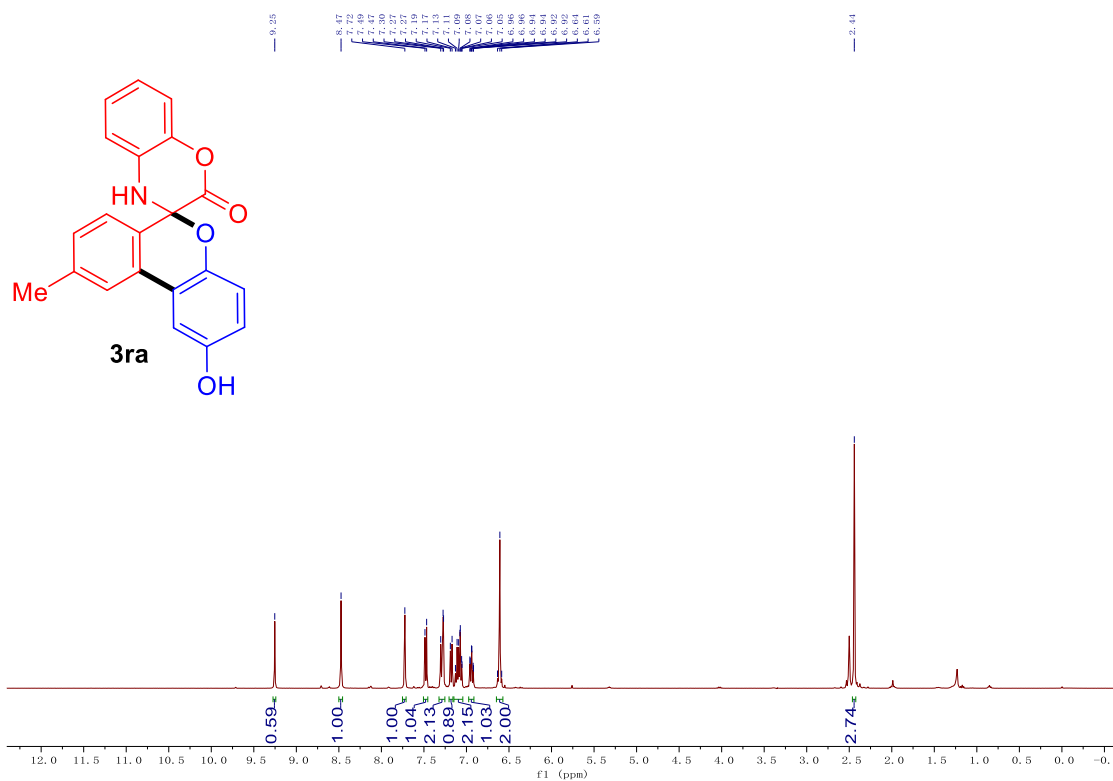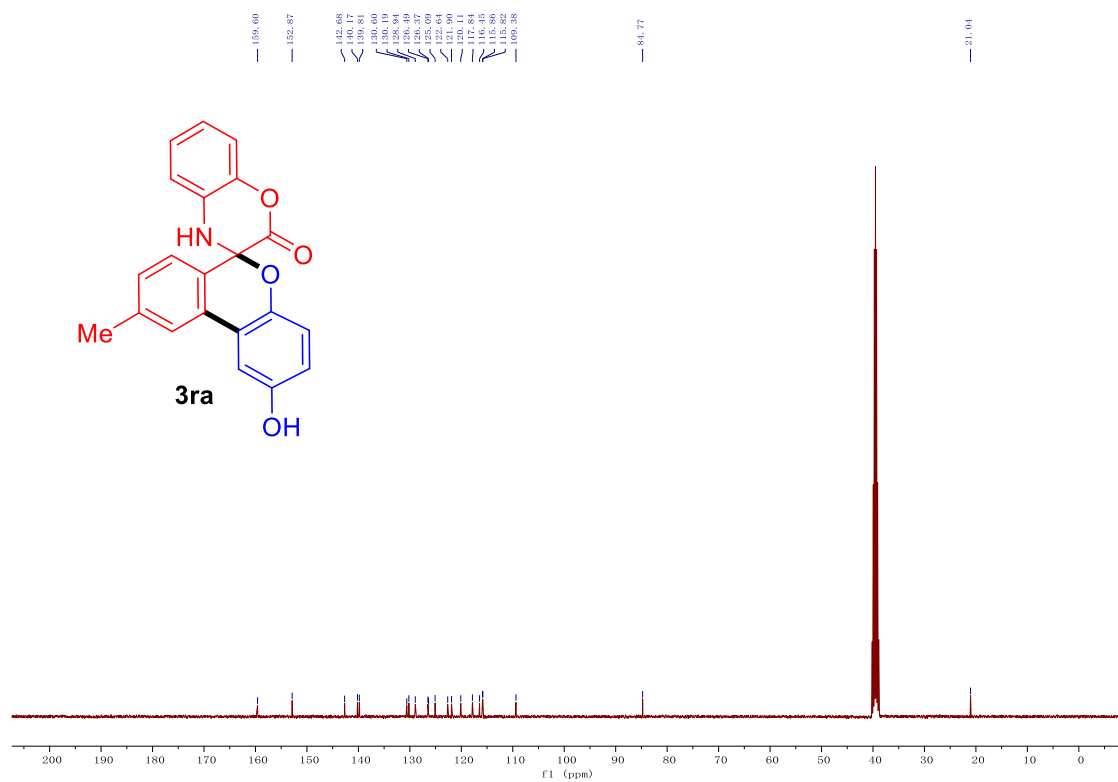





<sup>1</sup>H and <sup>13</sup>C NMR Spectra of compound **3ta**

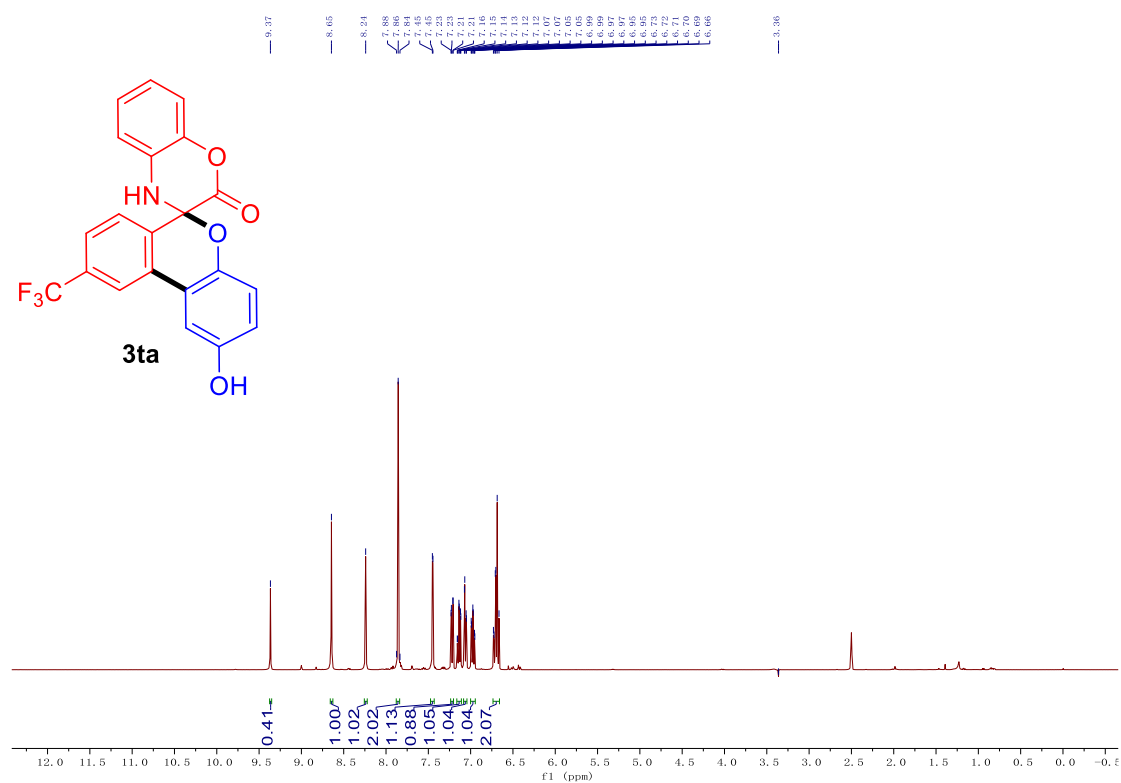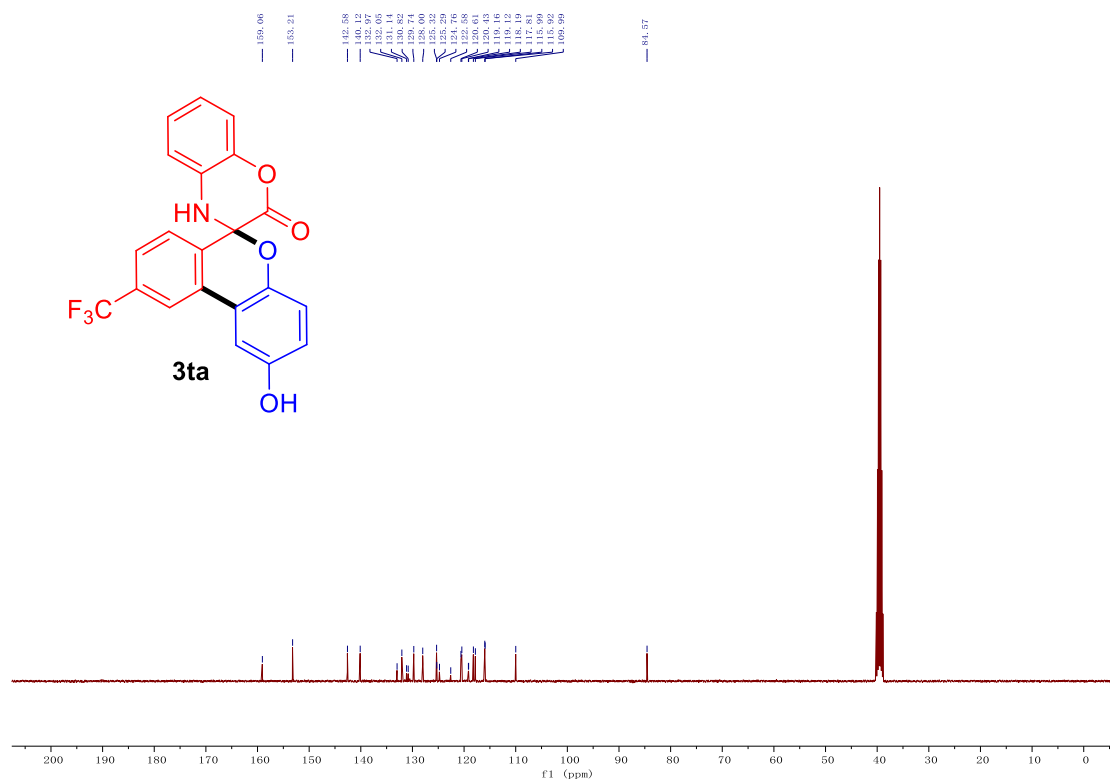

<sup>1</sup>H and <sup>13</sup>C NMR Spectra of compound **3ab**

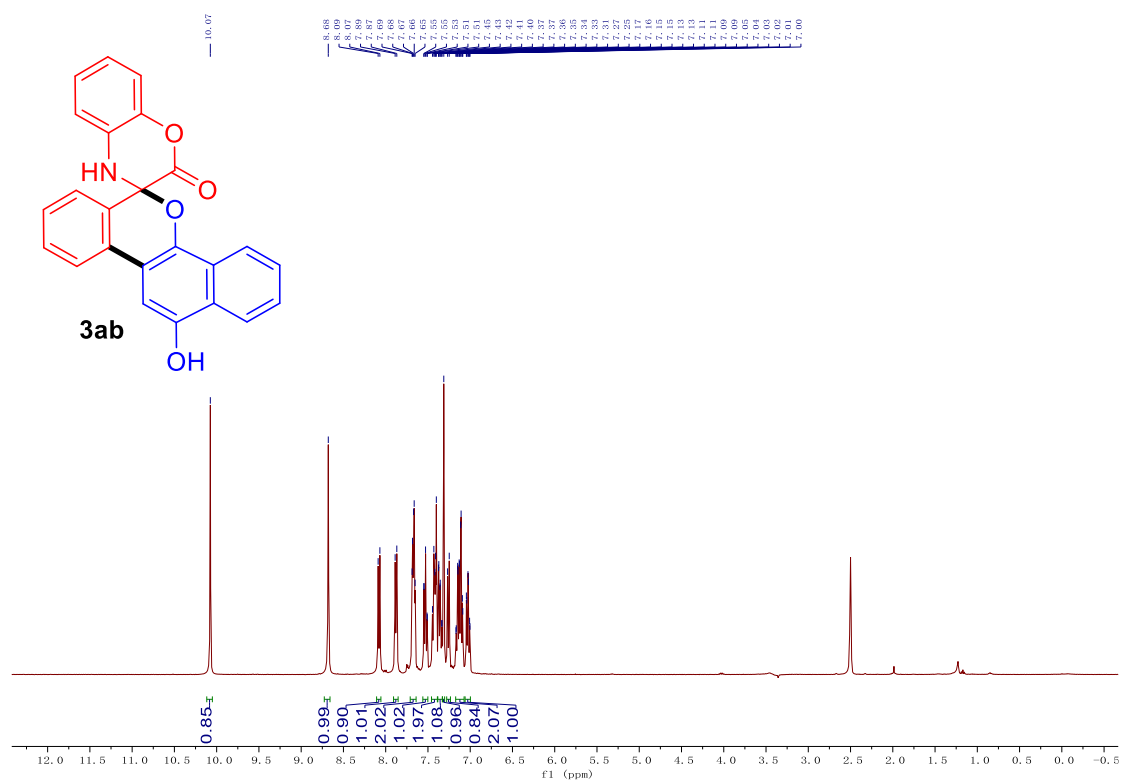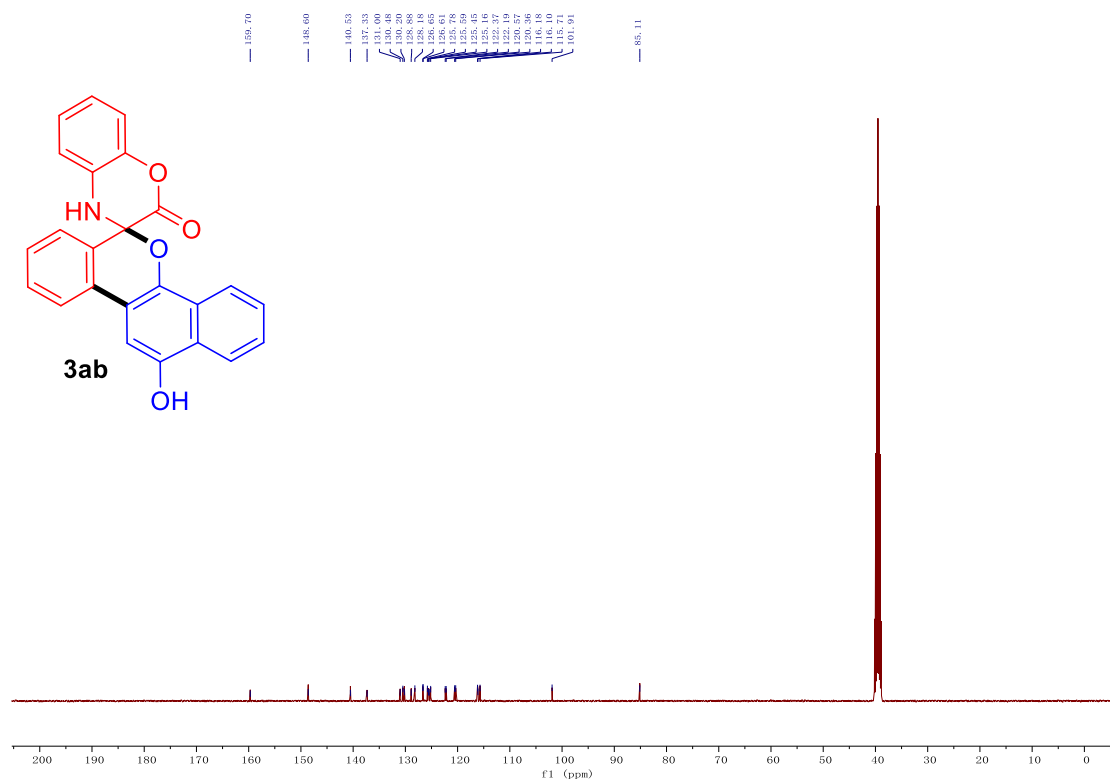

# <sup>1</sup>H and <sup>13</sup>C NMR Spectra of compound **3ac**

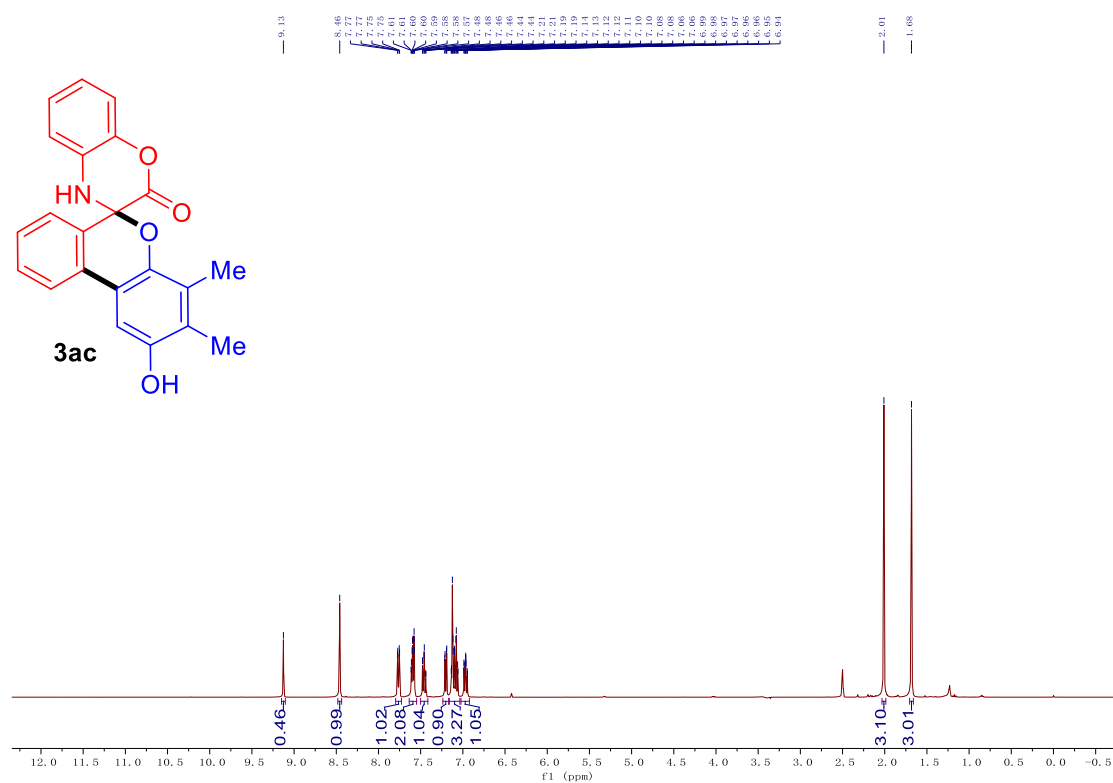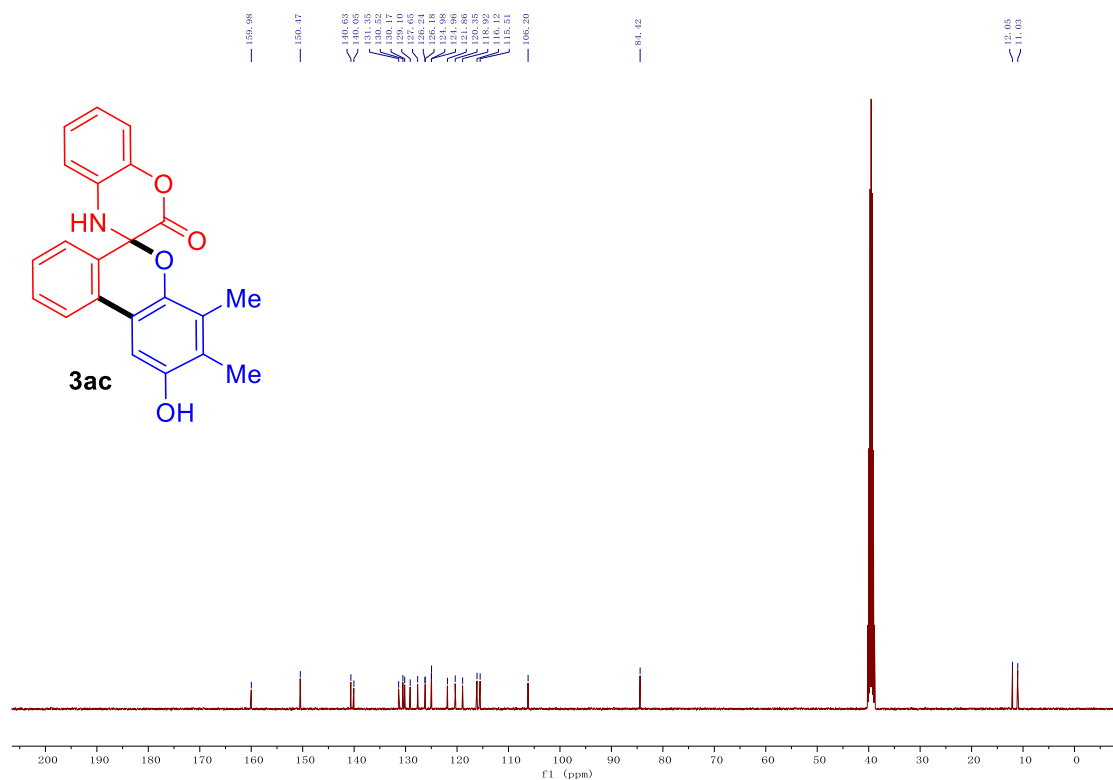

<sup>1</sup>H and <sup>13</sup>C NMR Spectra of compound **3ae**

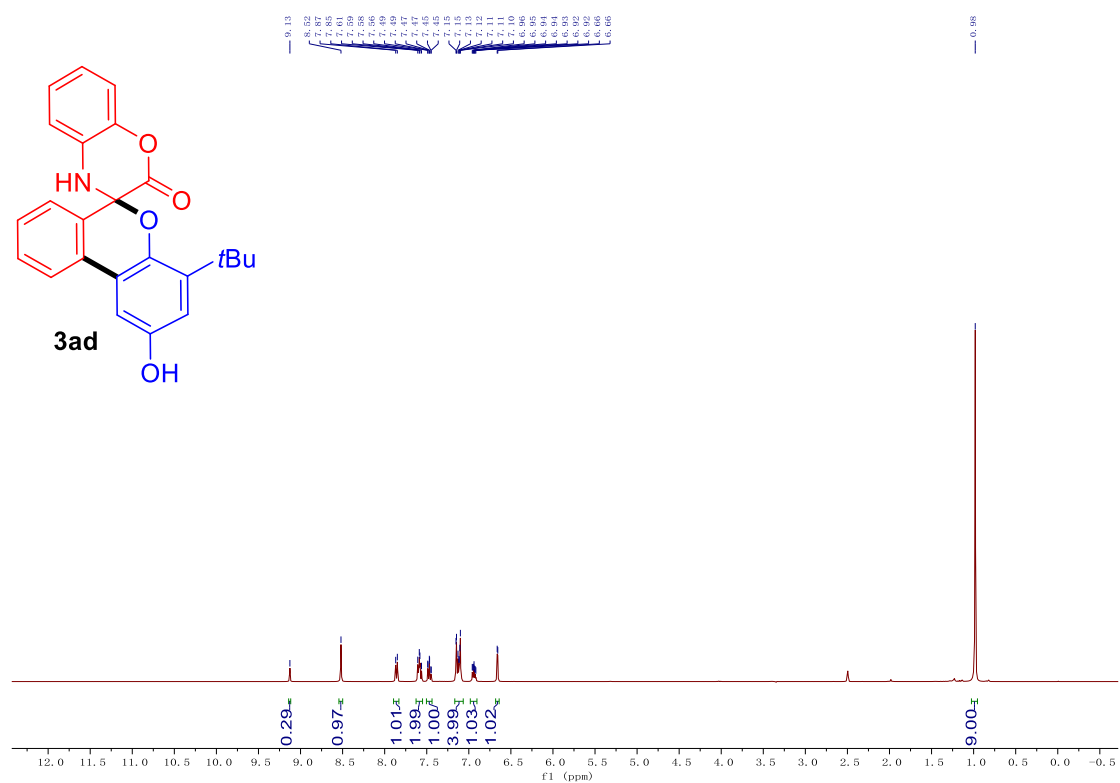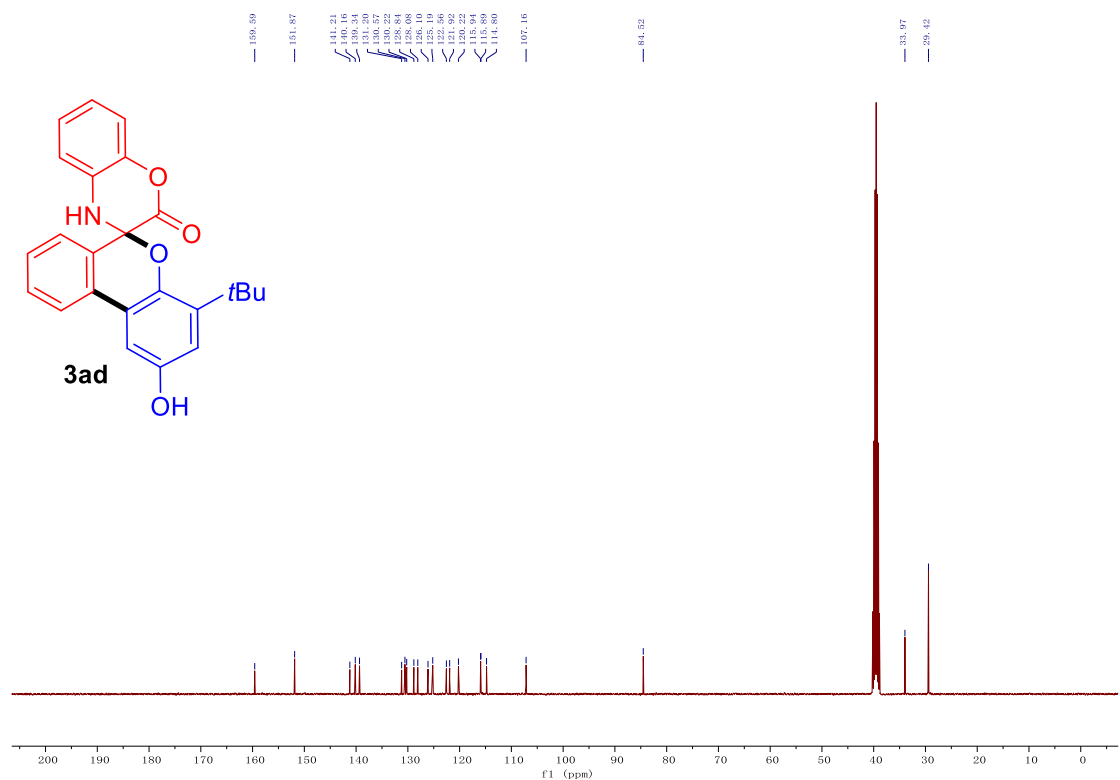

# <sup>1</sup>H and <sup>13</sup>C NMR Spectra of compound 4aa

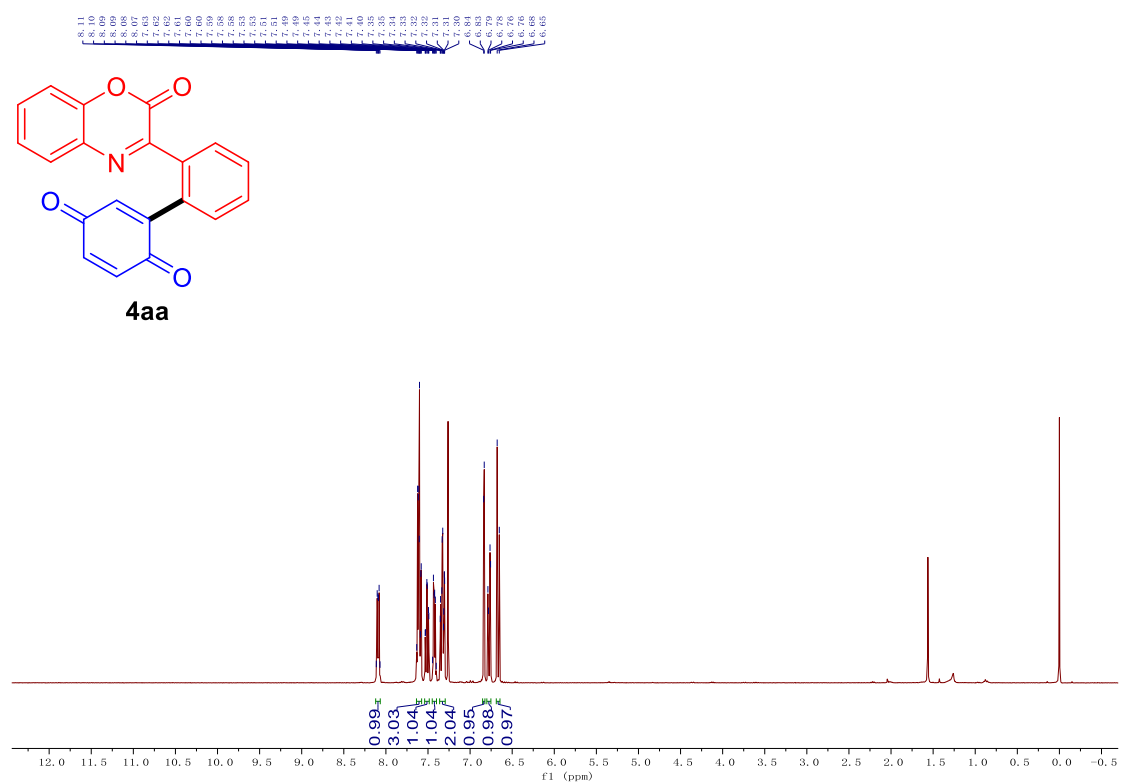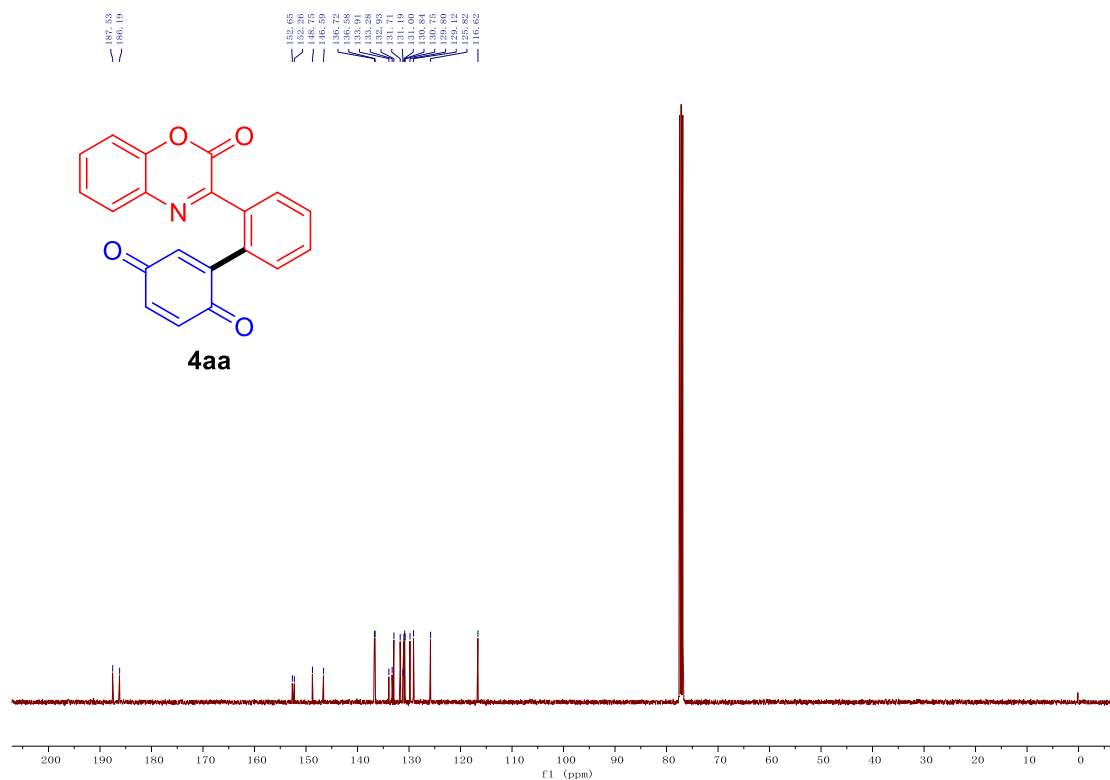

<sup>1</sup>H and <sup>13</sup>C NMR Spectra of compound **4ba**

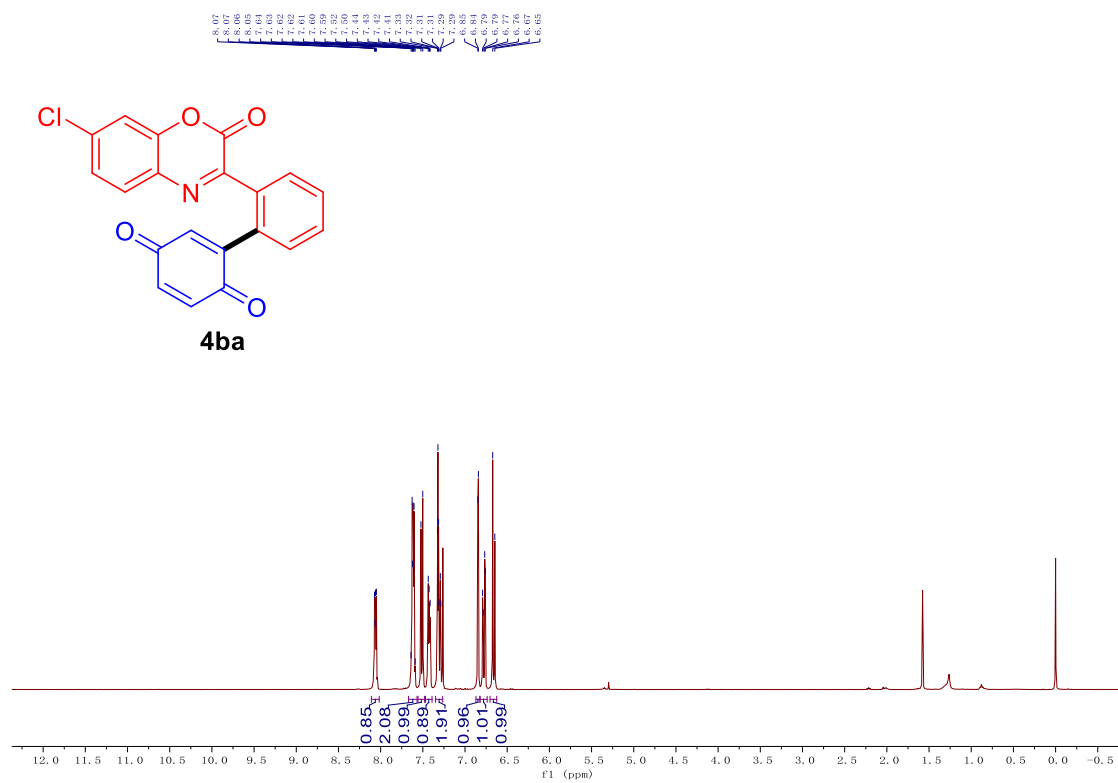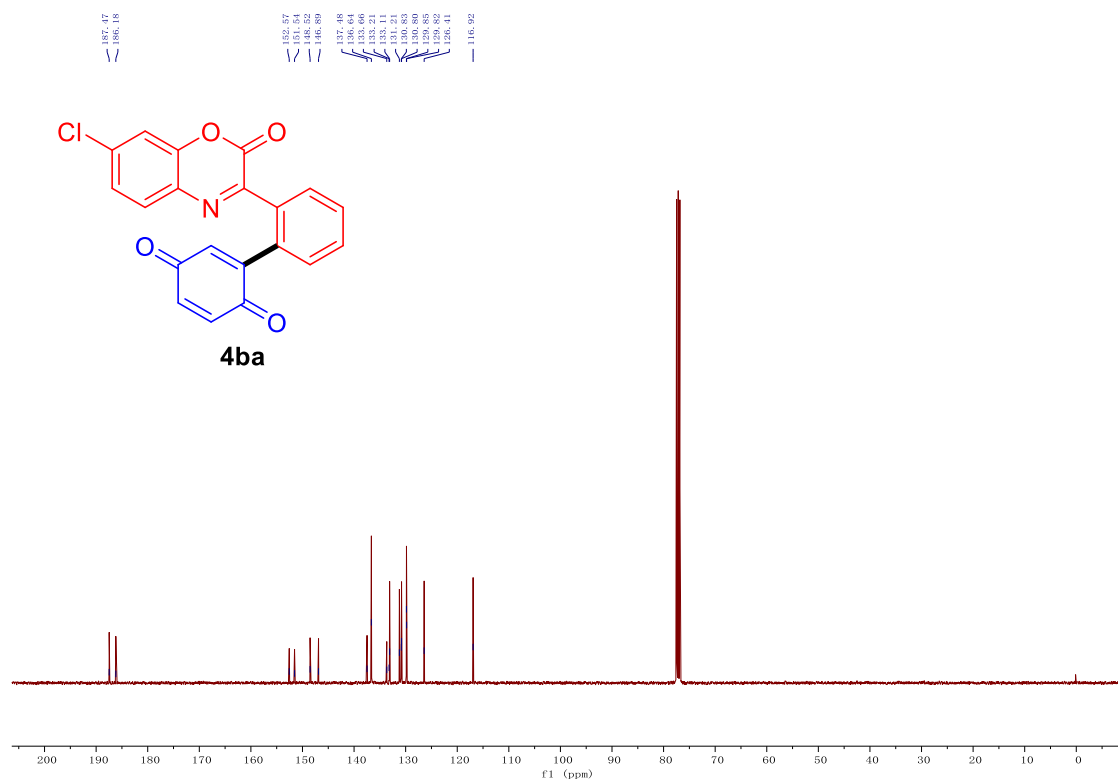

# <sup>1</sup>H and <sup>13</sup>C NMR Spectra of compound 4da

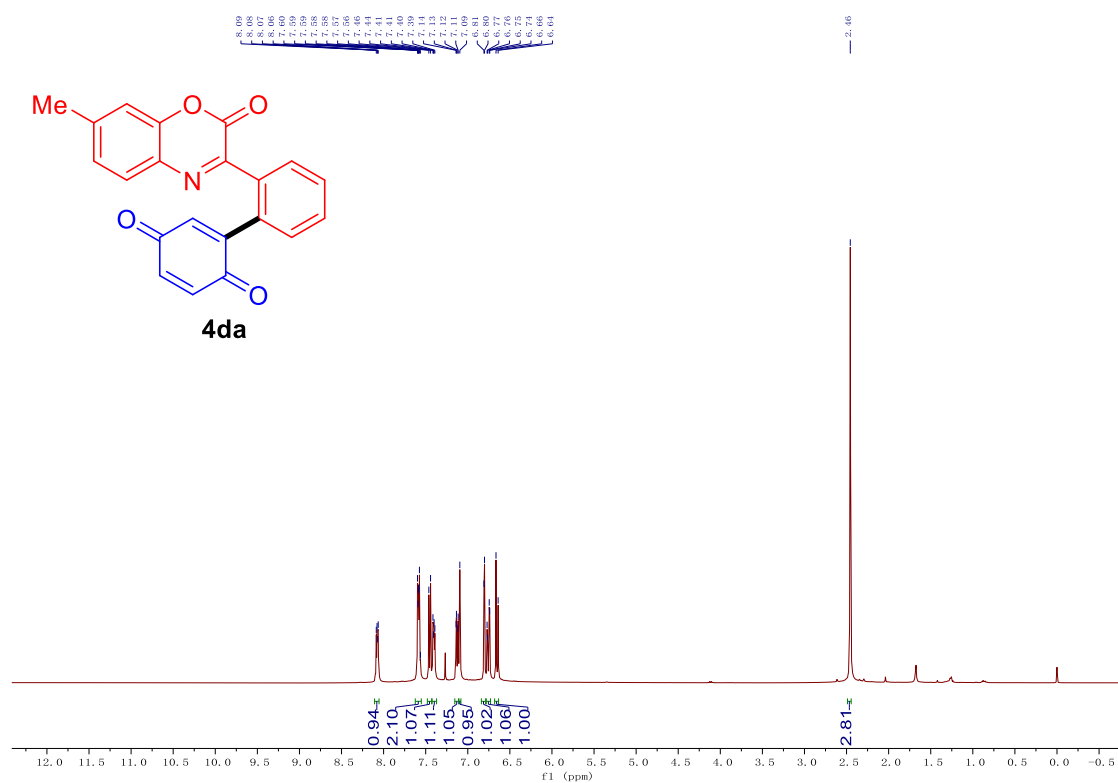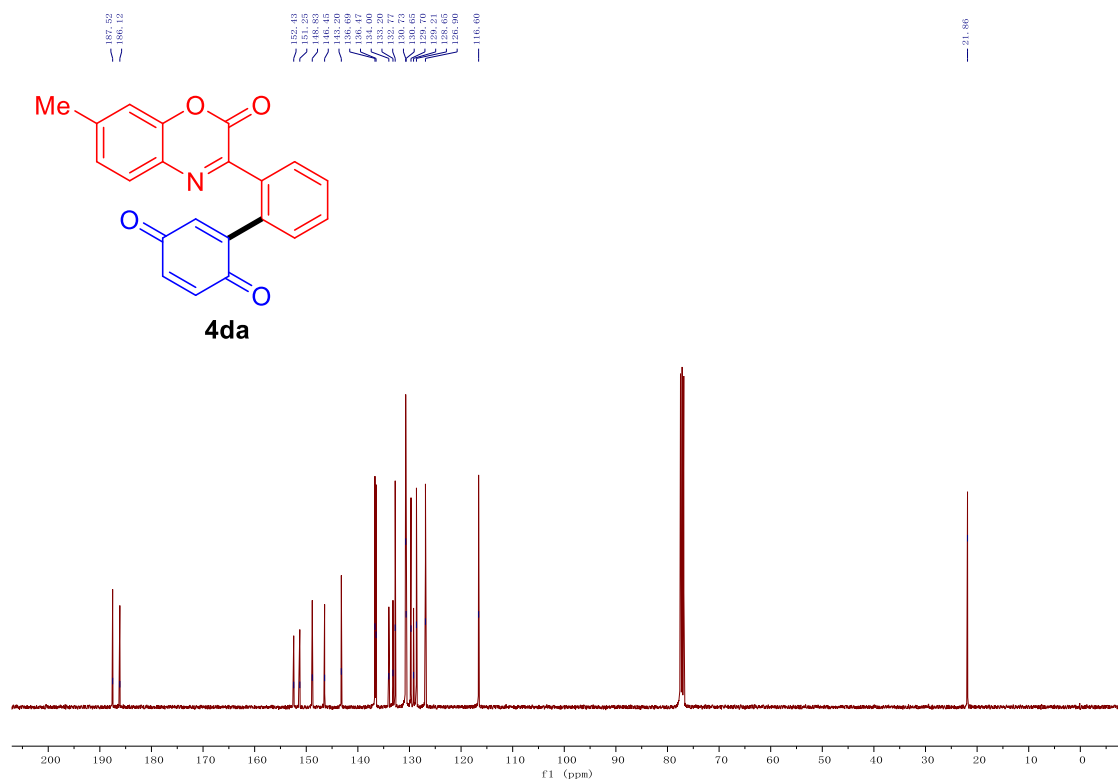



# $^1\text{H}$ and $^{13}\text{C}$ NMR Spectra of compound **4fa**

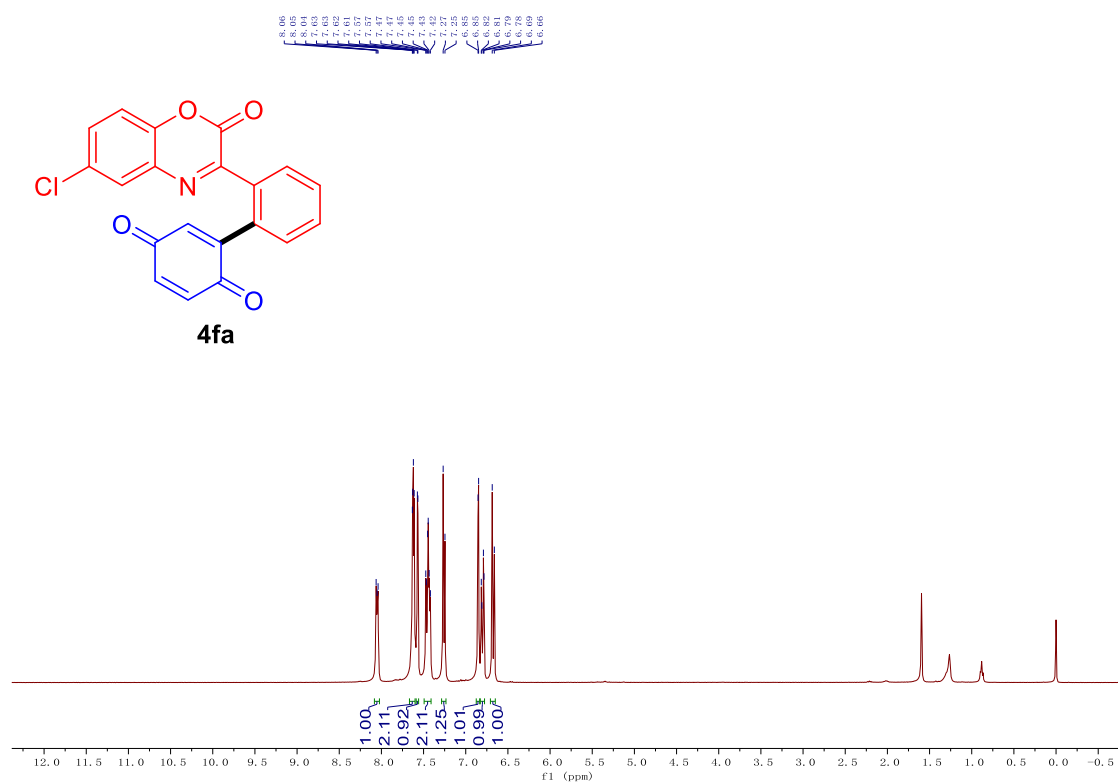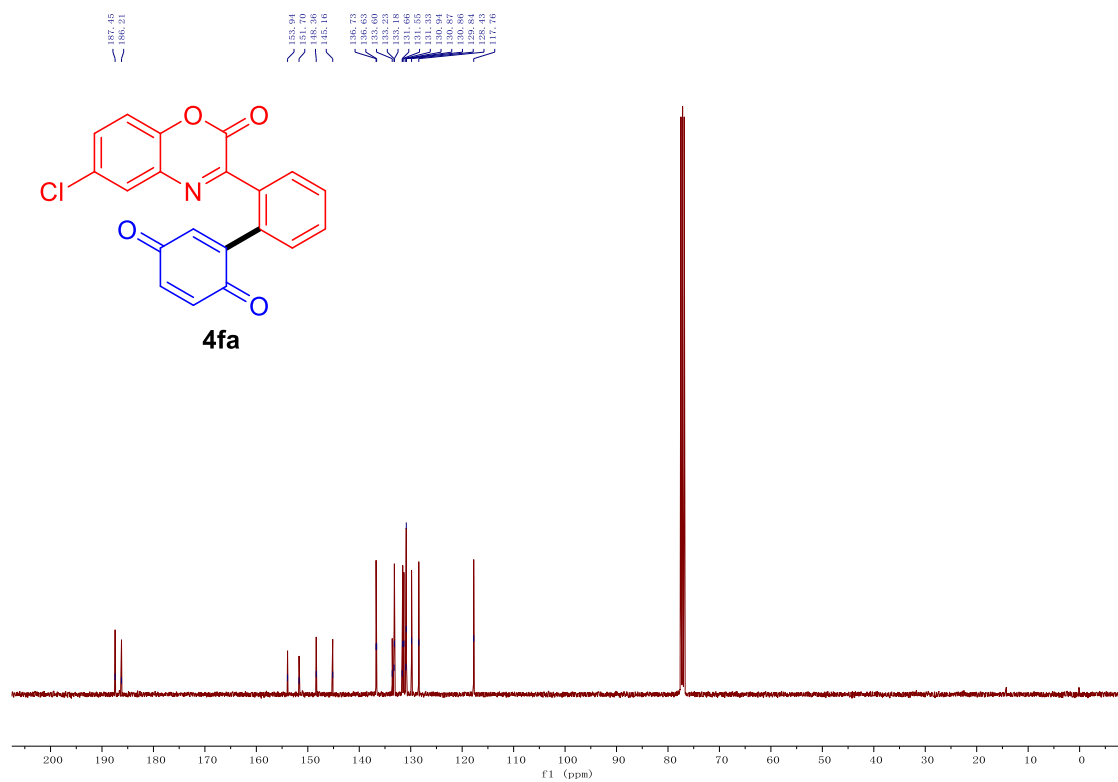

# <sup>1</sup>H and <sup>13</sup>C NMR Spectra of compound 4ia

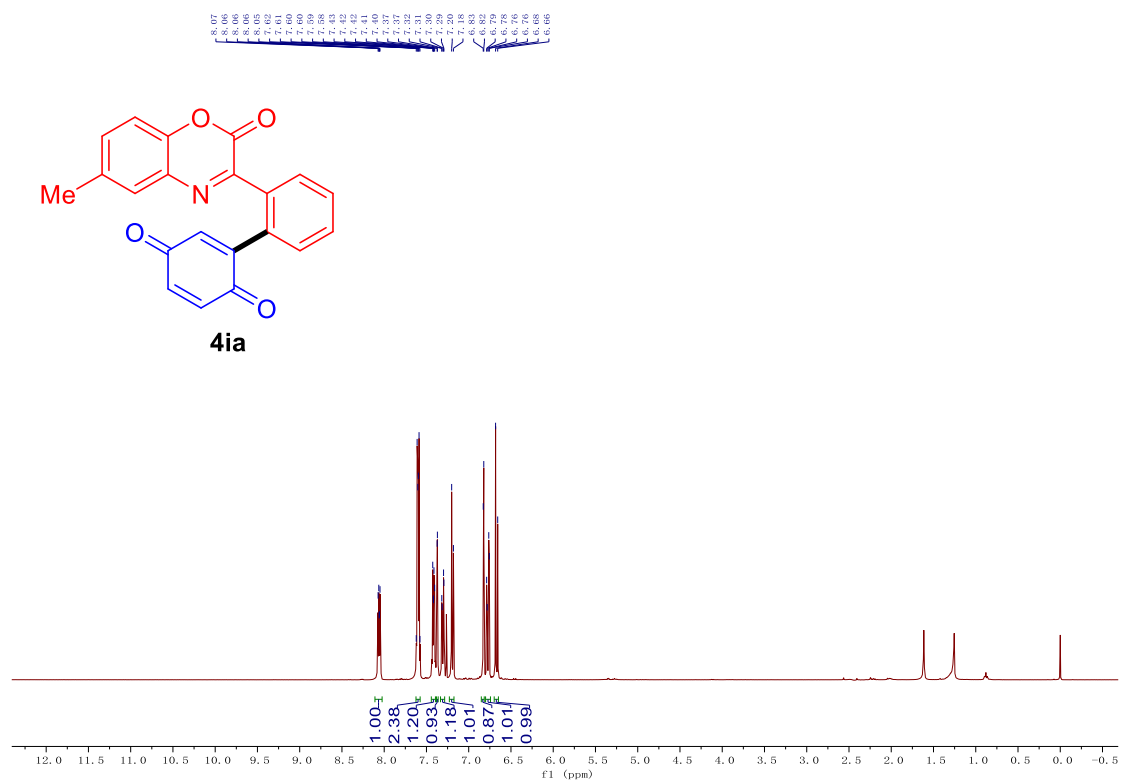

<sup>1</sup>H and <sup>13</sup>C NMR Spectra of compound **4ma**

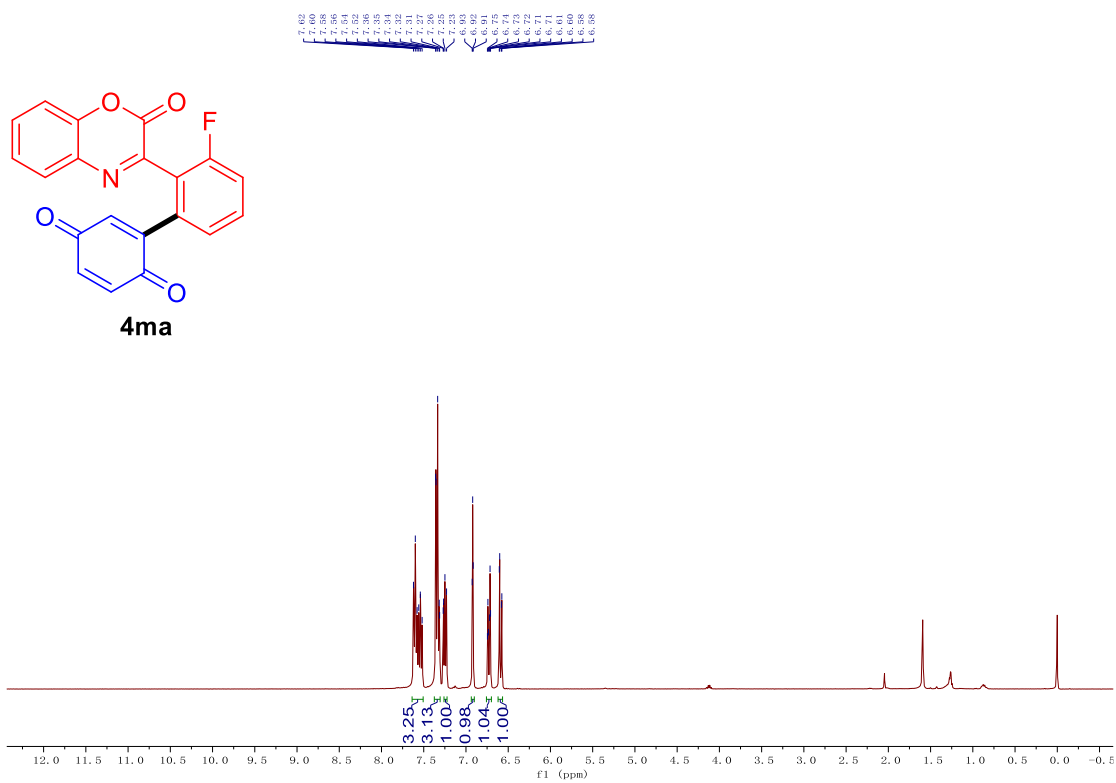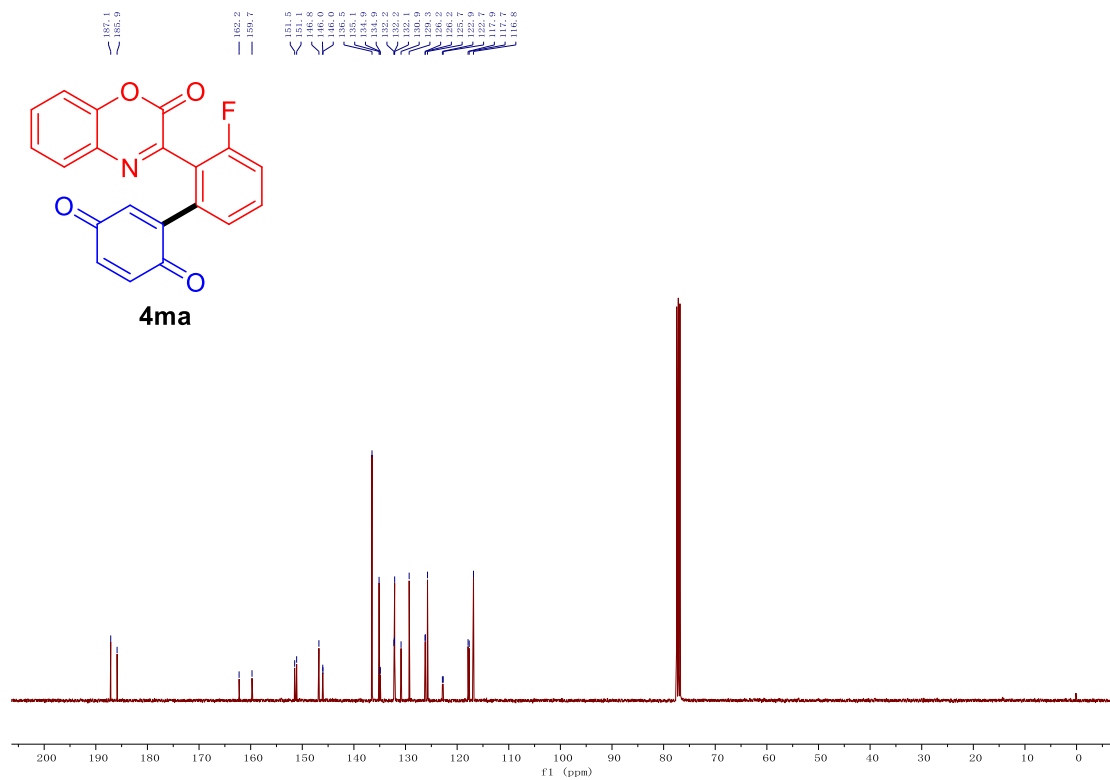



# <sup>1</sup>H and <sup>13</sup>C NMR Spectra of compound 4ra

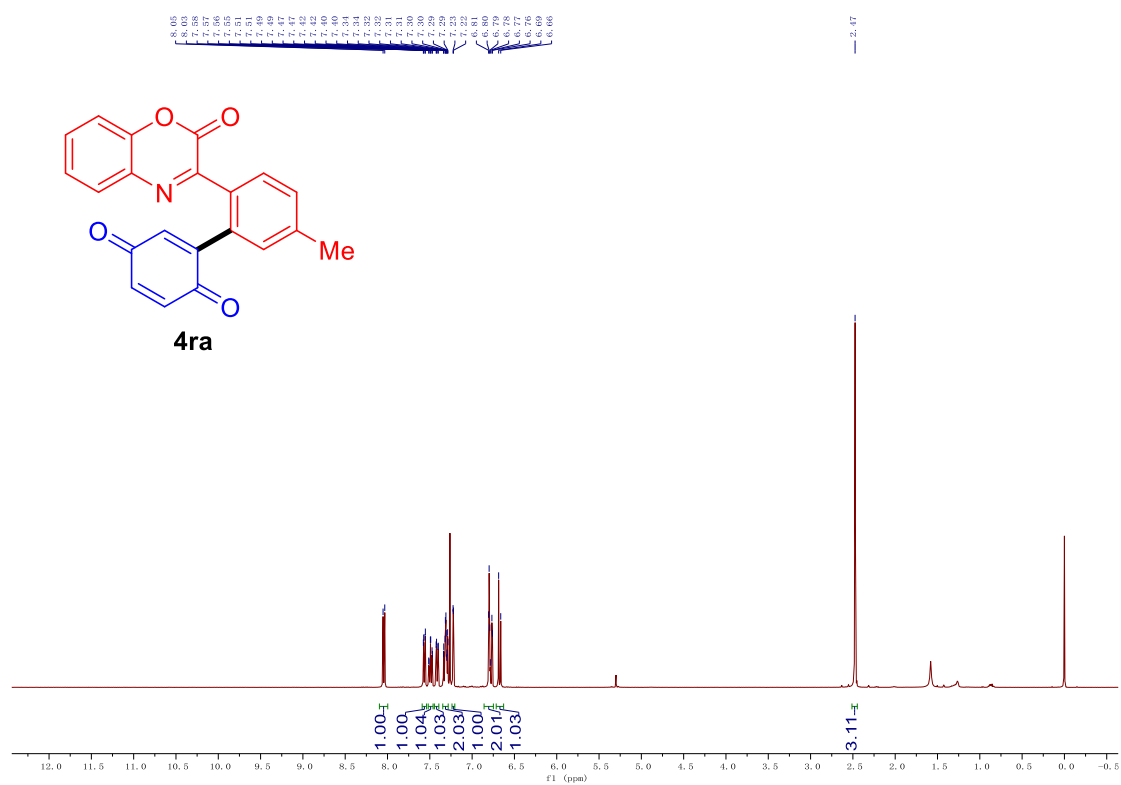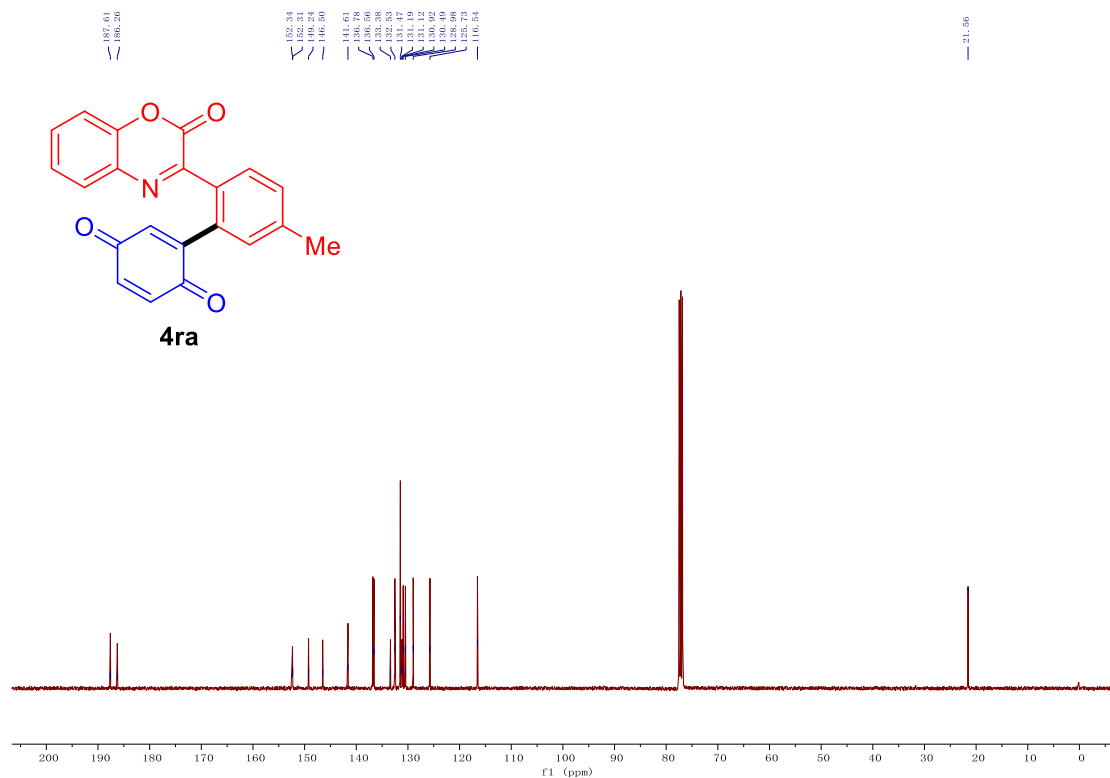

# <sup>1</sup>H and <sup>13</sup>C NMR Spectra of compound 4sa

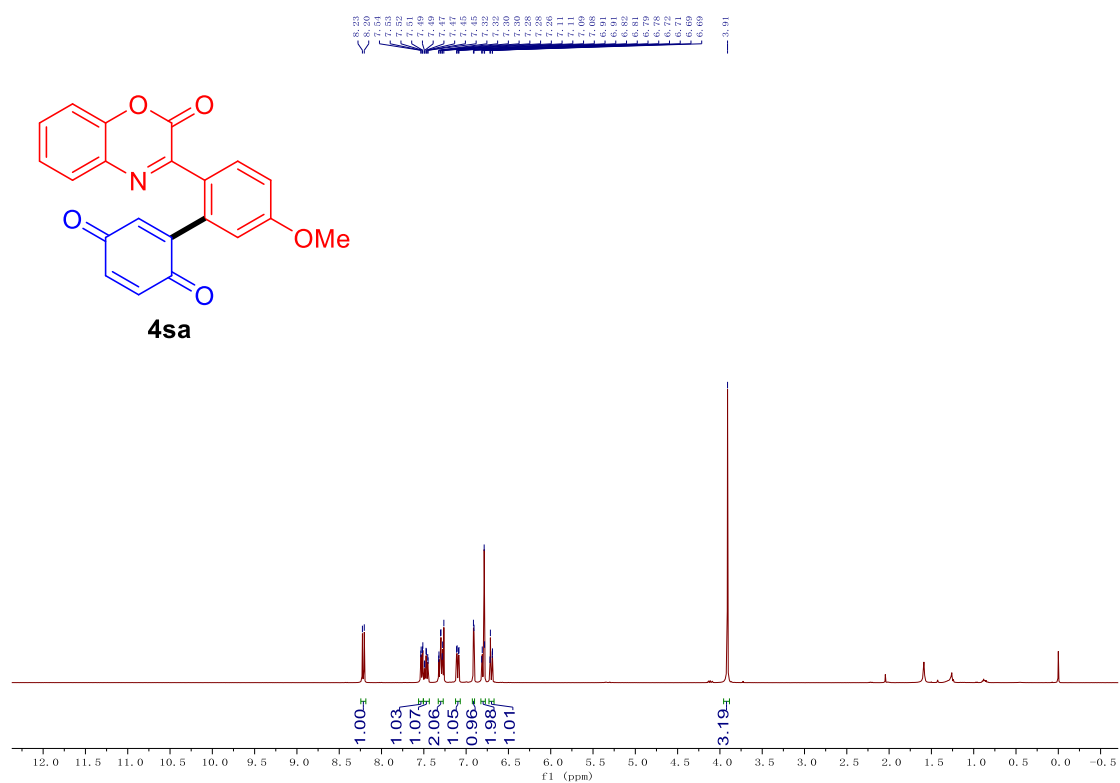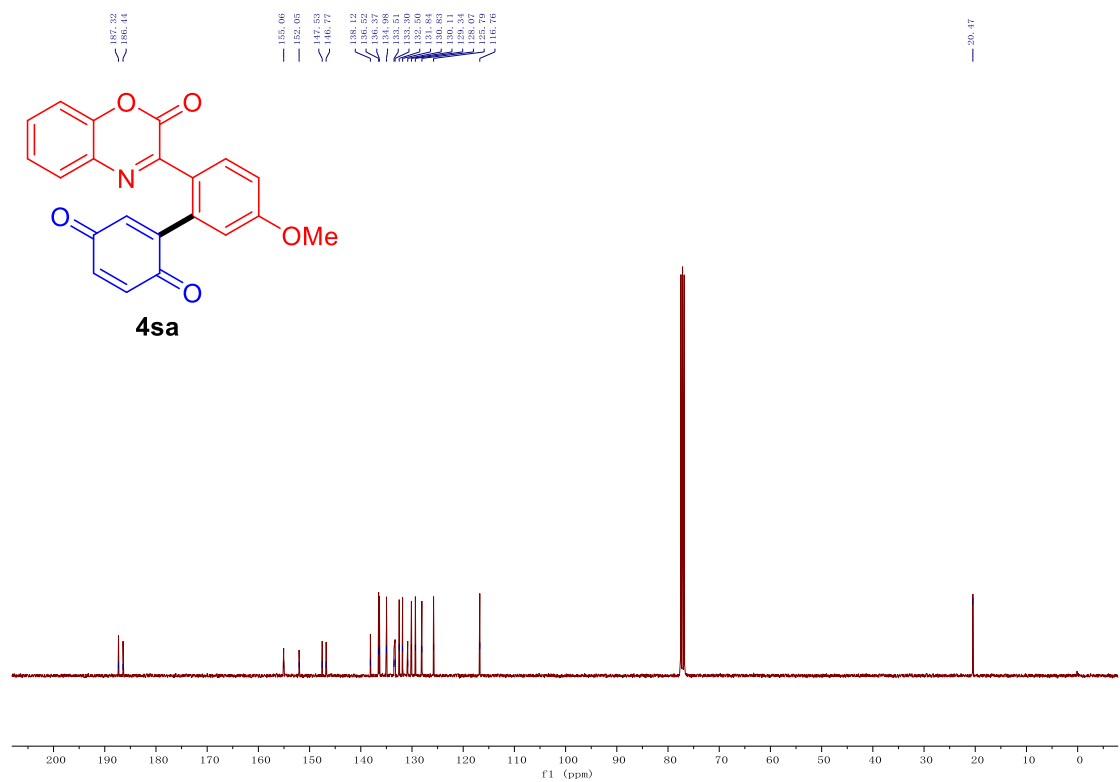



<sup>1</sup>H and <sup>13</sup>C NMR Spectra of compound **4ab**

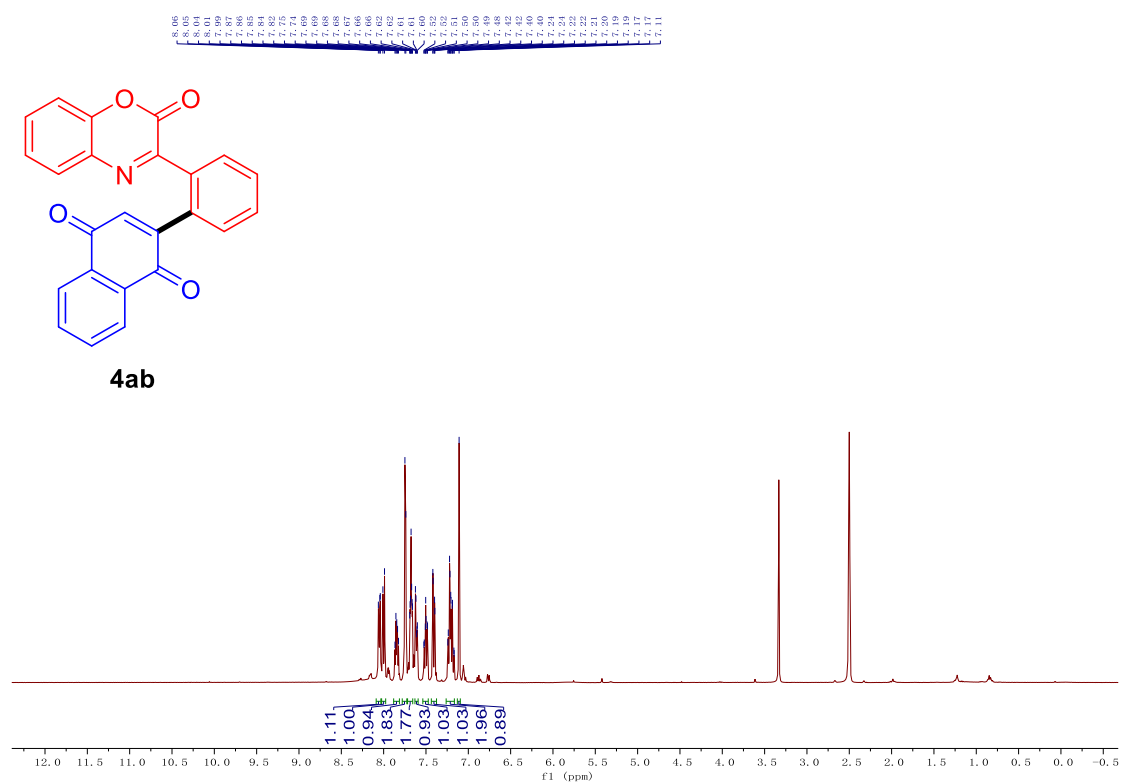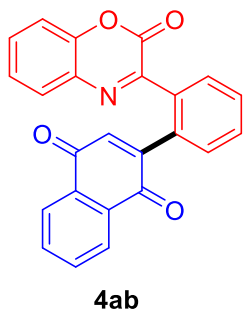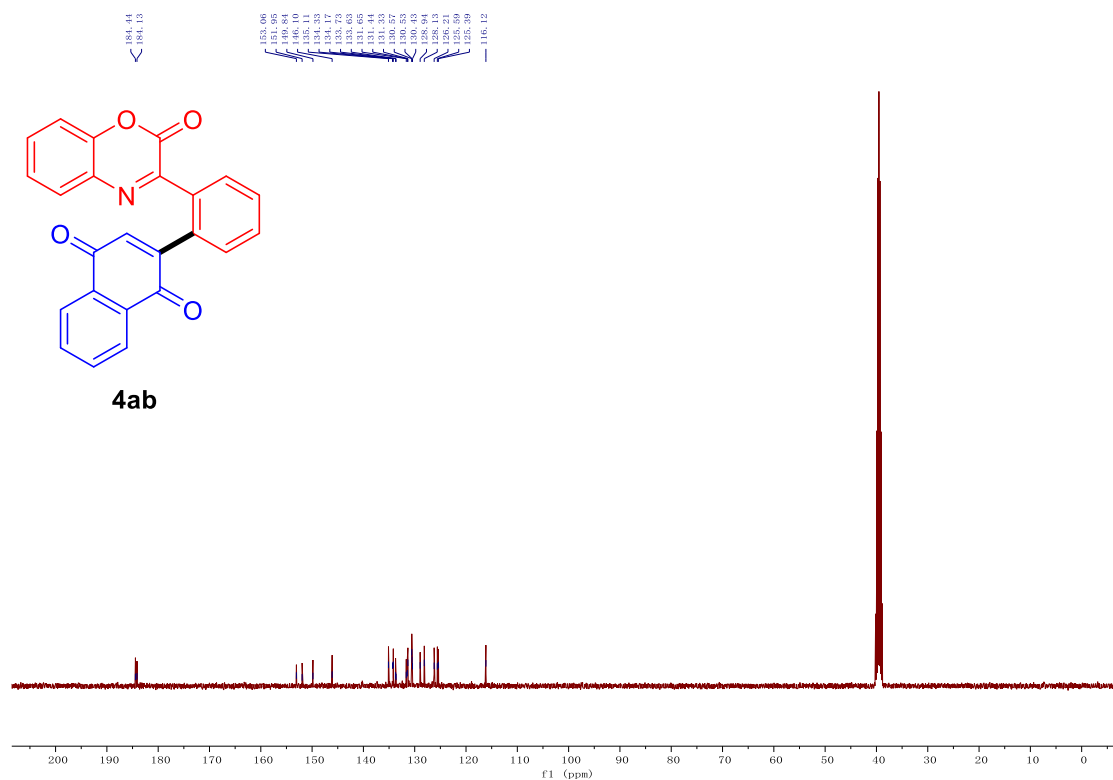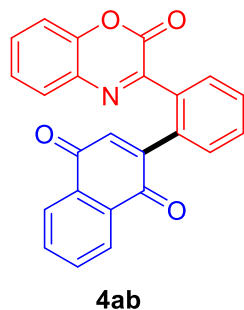



# <sup>1</sup>H and <sup>13</sup>C NMR Spectra of compound 6aa

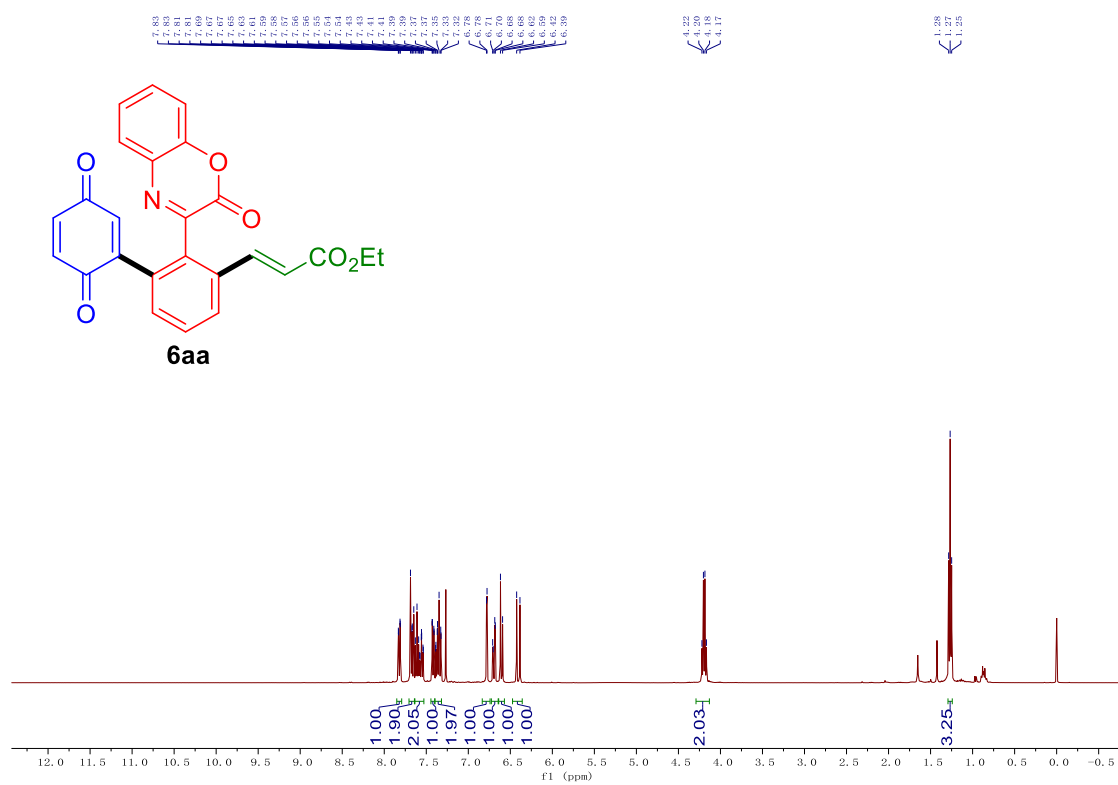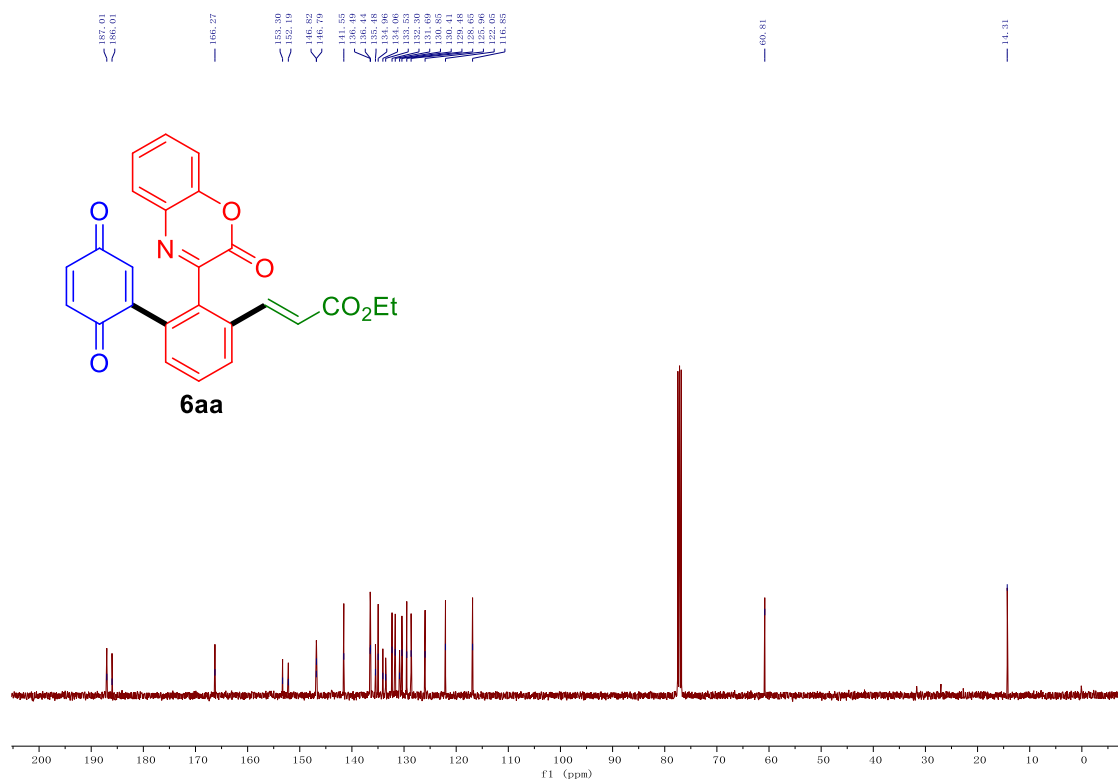

<sup>1</sup>H and <sup>13</sup>C NMR Spectra of compound **7aa**

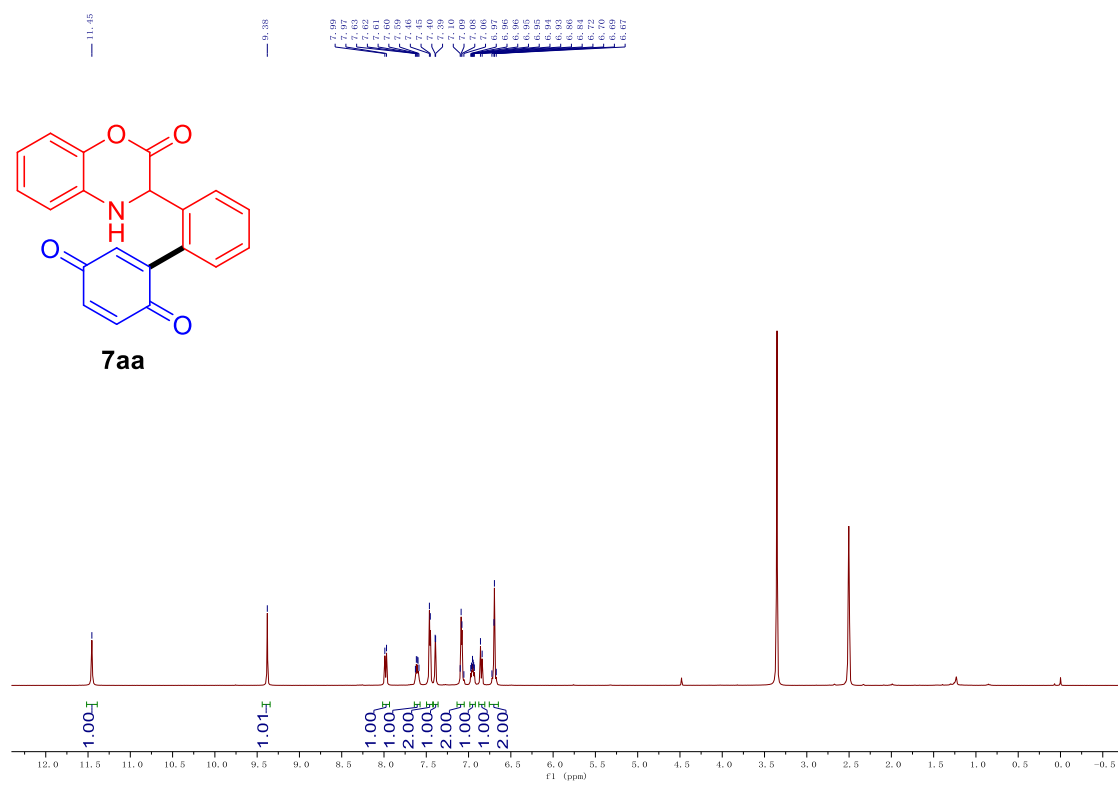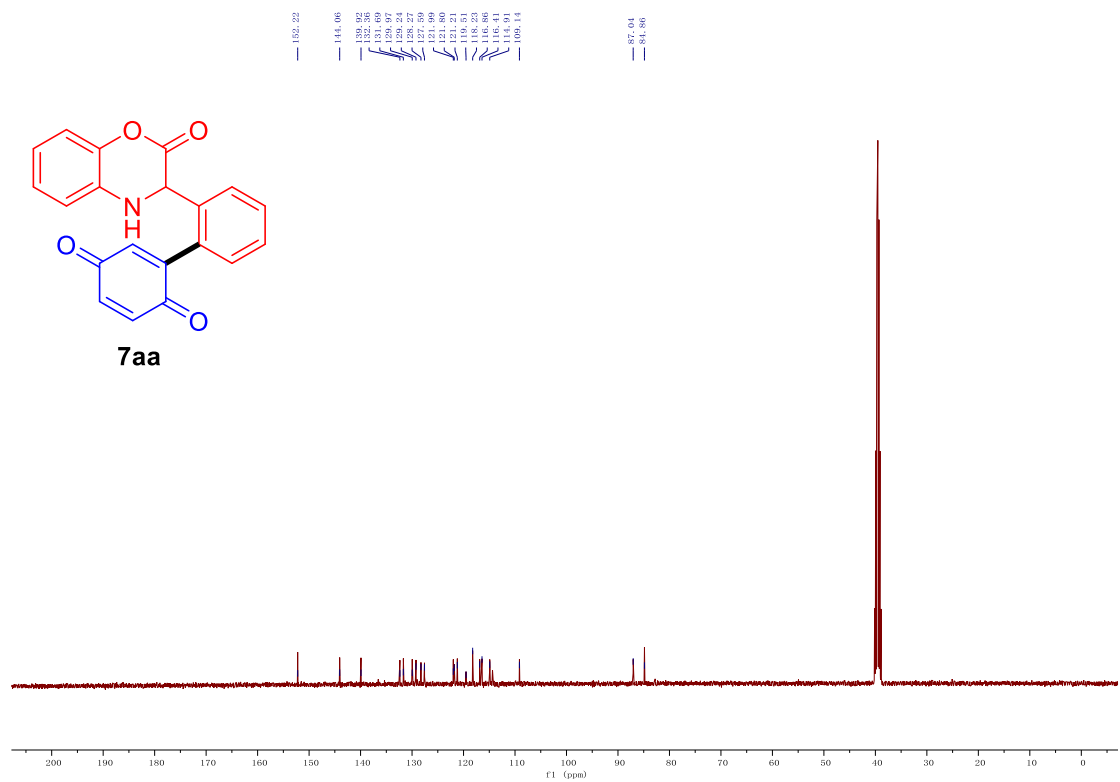

<sup>1</sup>H and <sup>13</sup>C NMR Spectra of compound **8aa**

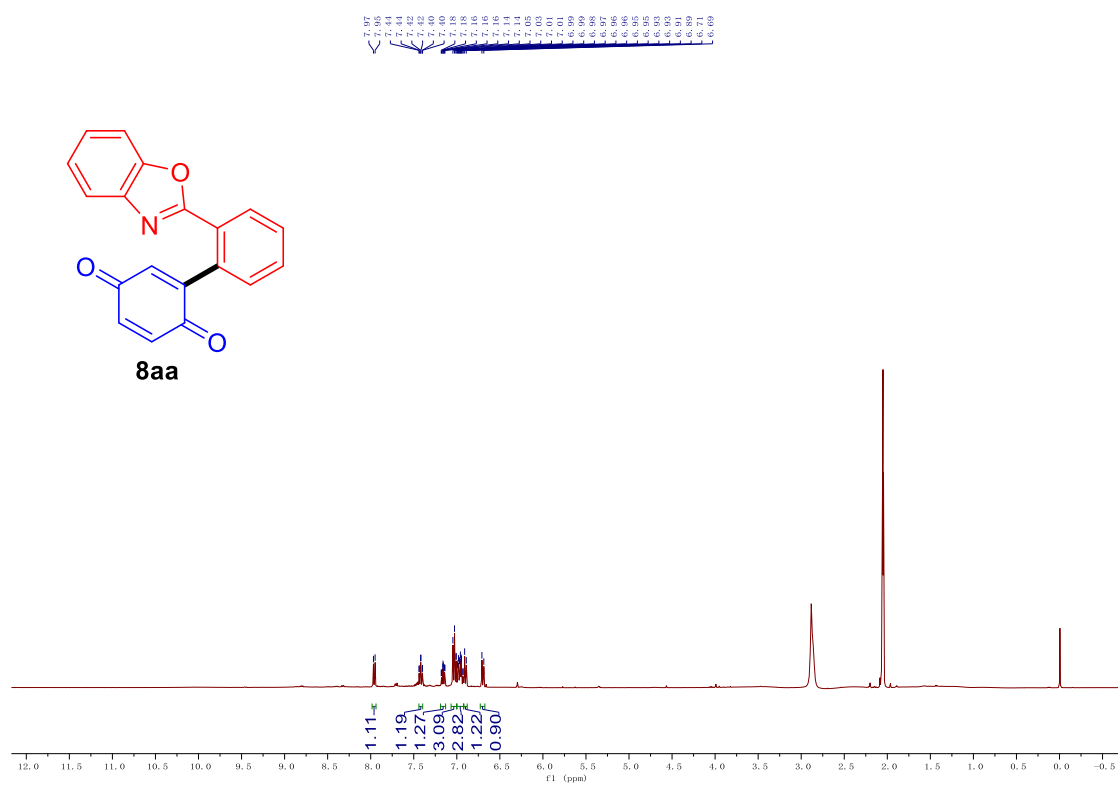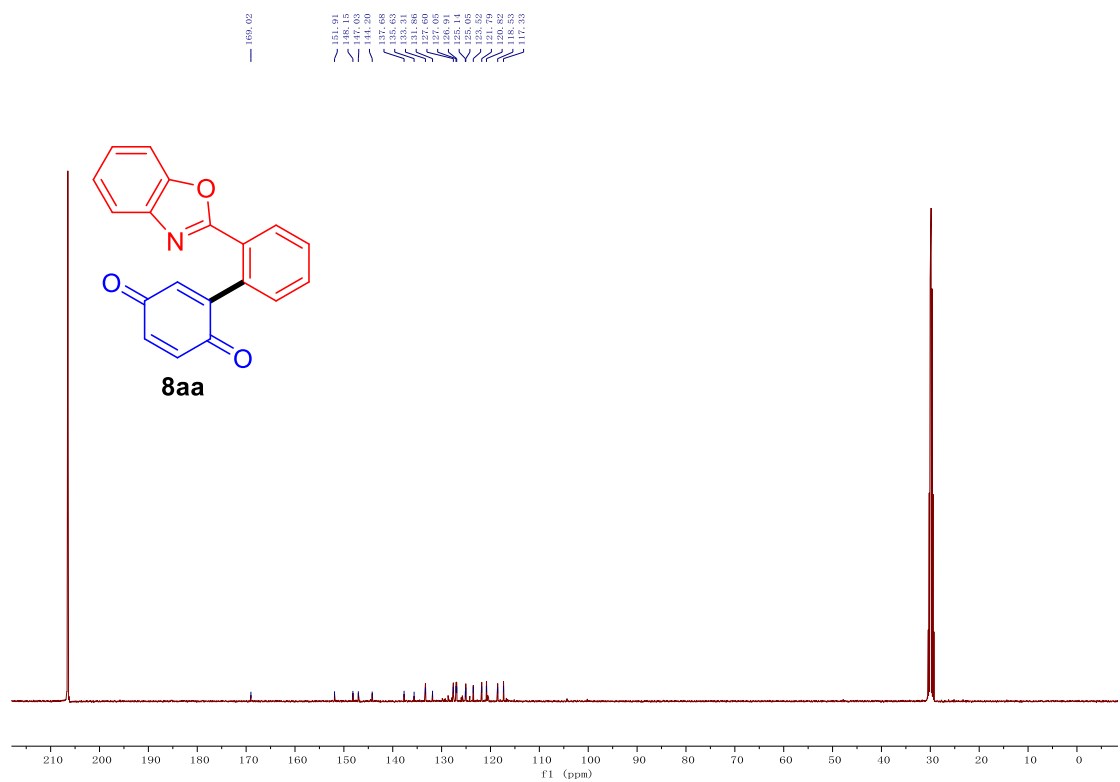



<sup>1</sup>H and <sup>13</sup>C NMR Spectra of compound **11u**

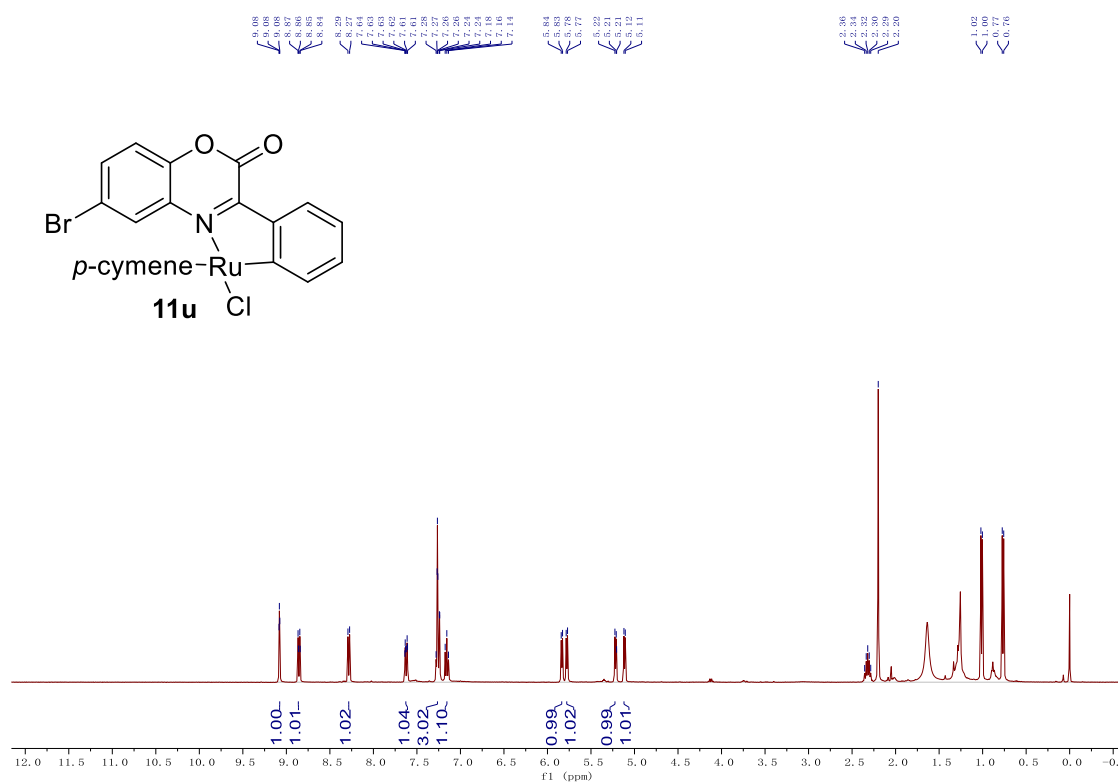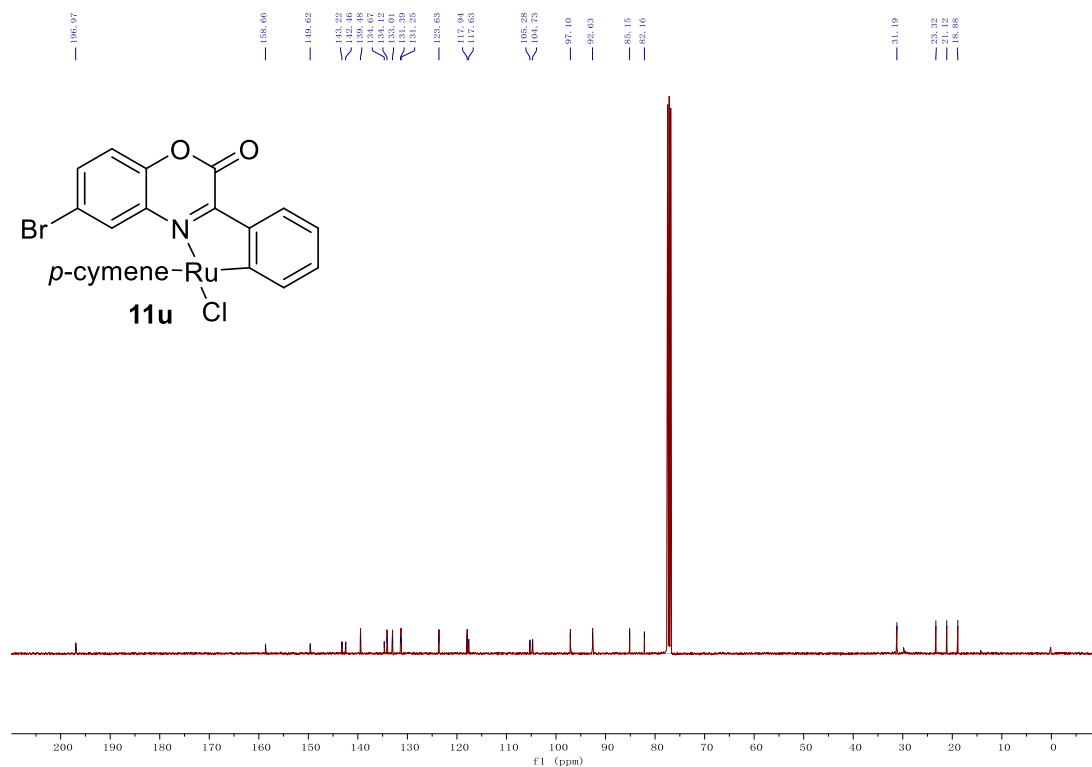

Supplement: d3cc03395c1.pdf [file d3cc03395c1.pdf]
